# Supplementary material for: Viral targeting of TFIIB impairs de novo polymerase II recruitment and affects antiviral immunity
Source: PLoS Pathog. 2018 Apr 30;14(4):e1006980. doi: 10.1371/journal.ppat.1006980 (PMC5927403; doi:10.1371/journal.ppat.1006980)
Supplement: S4 Table — Number of genes regulated by transcription factors, identified with iRegulon as upstream regulators. (XLSX) [file ppat.1006980.s011.xlsx]

## Sheet: Summary
S4 Table
Results of upstream regulator analysis
Number of genes regulated by transcription factors, identified with iRegulon as upstream regulators

## Sheet: iRegulon
transcription factor	number of target genes
IRF8	196
IRF3	207
FOS	142
STAT	151
IRF4	131
RELA	120
STAT3	145
SPI1	58
