# Supplementary material for: Viral targeting of TFIIB impairs de novo polymerase II recruitment and affects antiviral immunity
Source: PLoS Pathog. 2018 Apr 30;14(4):e1006980. doi: 10.1371/journal.ppat.1006980 (PMC5927403; doi:10.1371/journal.ppat.1006980)
Supplement: S5 Table — Presented are FPKM values and contrasts (fold change and q values). (XLSX) [file ppat.1006980.s012.xlsx]

## Sheet: Summary
S5 Table
Transcriptome analysis of HeLa cells before and after TFIIB depletion and TNF-a treatment
Presented are FPKM values and contrasts (fold change and q values)

## Sheet: TNF_transcriptome
Ensembl ID	Gene symbol	siTFIIB FPKM	siScr+TNF FPKM	siTFIIB + TNF FPKM	siScr FPKM	siTFIIB vs. siScr qvalue	siScr + TNF vs. siScr qvalue	siTFIIB + TNF vs. siScr qvalue	siScr + TNF vs. siTFIIB qvalue	siTFIIB + TNF vs. siTFIIB qvalue	siScr + TNF vs. siTFIIB + TNF qvalue	siTFIIB vs. siScr stabilized logfc	siScr + TNF vs. siScr stabilized logfc	siTFIIB + TNF vs. siScr stabilized logfc	siScr + TNF vs. siTFIIB + TNF stabilized logfc	siTFIIB + TNF vs. siTFIIB stabilized logfc	siScr + TNF vs. siTFIIB stabilized logfc
ENSG00000000003	TSPAN6	8.83606	12.2135	9.40641	10.5179	0.618292	0.6645	0.810968	0.0987371	0.935086	0.241367	-0.208152	0.183269	-0.134148	0.317417	0.0740045	0.391422
ENSG00000000419	DPM1	46.9108	48.0608	44.8566	46.5669	0.994184	0.982897	0.978714	0.986928	0.976767	0.95547	0.0101797	0.0437079	-0.0517211	0.0954291	-0.0619008	0.0335283
ENSG00000000457	SCYL3	1.62635	2.80439	1.79989	2.65566	0.513691	0.983814	0.606686	0.605534	0.966778	0.675289	-0.360468	0.0453676	-0.293028	0.338396	0.0674395	0.405835
ENSG00000000460	C1orf112	14.688	20.1323	14.1695	10.3887	0.381889	0.496552	0.412551	0.782847	0.980977	0.736909	0.429786	0.837129	0.38425	0.452878	-0.045536	0.407342
ENSG00000001036	FUCA2	105.563	105.714	107.158	113.469	0.846049	0.838059	0.896801	0.997207	0.983952	0.984346	-0.102324	-0.1003	-0.0810877	-0.0192121	0.021236	0.00202388
ENSG00000001084	GCLC	39.104	47.5319	38.4541	42.2682	0.957148	0.917986	0.924719	0.867126	0.99087	0.794939	-0.106992	0.162087	-0.129985	0.292072	-0.0229929	0.269079
ENSG00000001167	NFYA	8.07319	5.37787	5.92288	9.77663	0.580333	0.00582385	0.0180295	0.118782	0.279054	0.911314	-0.225406	-0.67465	-0.57183	-0.102821	-0.346424	-0.449244
ENSG00000001460	STPG1	2.23043	4.37194	2.40552	3.92442	0.428148	0.97268	0.540164	0.451237	0.97736	0.548977	-0.48587	0.105059	-0.427362	0.53242	0.058508	0.590928
ENSG00000001461	NIPAL3	2.32446	2.87523	2.39096	3.26287	0.599638	0.920707	0.636693	0.831356	0.988612	0.864227	-0.28333	-0.110379	-0.261313	0.150934	0.0220164	0.17295
ENSG00000001497	LAS1L	82.4386	72.1933	85.3251	74.9633	0.68581	0.941368	0.484511	0.453719	0.943307	0.246732	0.133732	-0.0528817	0.182226	-0.235107	0.0484937	-0.186614
ENSG00000001617	SEMA3F	53.3942	50.499	52.0274	47.0619	0.766522	0.943554	0.873021	0.952633	0.98007	0.981418	0.175132	0.0976868	0.139088	-0.0414013	-0.0360437	-0.077445
ENSG00000001629	ANKIB1	16.3803	11.141	15.866	10.7006	0.398725	0.984381	0.480008	0.494916	0.985622	0.571512	0.533264	0.0491784	0.49232	-0.443142	-0.0409436	-0.484085
ENSG00000001630	CYP51A1	56.6441	54.698	53.2067	47.73	0.478625	0.641595	0.766522	0.964763	0.910917	0.976026	0.23787	0.189181	0.150727	0.0384545	-0.0871426	-0.0486881
ENSG00000001631	KRIT1	13.9481	16.5169	16.588	12.2608	0.91167	0.682556	0.566855	0.890213	0.842414	0.997168	0.16133	0.376788	0.382317	-0.00552896	0.220987	0.215458
ENSG00000002016	RAD52	4.26876	18.391	3.68553	7.83967	0.682881	0.755816	0.561083	0.566855	0.969858	0.521114	-0.65043	1.05125	-0.791315	1.84257	-0.140885	1.70168
ENSG00000002330	BAD	32.3482	43.6301	33.8644	40.9388	0.883431	0.983952	0.933014	0.849456	0.987505	0.906252	-0.322047	0.0877039	-0.259729	0.347433	0.062318	0.409751
ENSG00000002549	LAP3	31.7062	33.7203	32.4491	29.5423	0.916333	0.886286	0.880519	0.95547	0.980939	0.978474	0.0957261	0.179456	0.127178	0.0522779	0.0314523	0.0837302
ENSG00000002586	CD99	111.907	60.2476	123.124	75.6047	0.0144433	0.39712	0.00176087	0.00176087	0.834516	0.00176087	0.55364	-0.318126	0.689143	-1.00727	0.135502	-0.871766
ENSG00000002746	HECW1	2.956	1.76858	2.22359	2.01521	0.882568	0.973817	0.980236	0.819176	0.933862	0.94234	0.303701	-0.0914544	0.0729943	-0.164449	-0.230706	-0.395155
ENSG00000002822	MAD1L1	72.2657	83.1015	83.5533	62.8549	0.880221	0.576505	0.506474	0.87206	0.835424	0.995516	0.19548	0.391969	0.399608	-0.00763894	0.204127	0.196489
ENSG00000002834	LASP1	214.043	164.087	217.19	174.863	0.07918	0.839152	0.167902	0.0207025	0.982897	0.0503208	0.288686	-0.0906931	0.30955	-0.400243	0.0208635	-0.379379
ENSG00000002919	SNX11	10.5817	20.1183	9.54172	17.6787	0.0872365	0.882878	0.0233574	0.0359232	0.922213	0.00458804	-0.645308	0.168606	-0.769777	0.938382	-0.124469	0.813914
ENSG00000003056	M6PR	265.697	336.193	289.286	341.893	0.216286	0.987097	0.564589	0.466947	0.86602	0.729422	-0.361359	-0.024113	-0.239523	0.21541	0.121835	0.337246
ENSG00000003096	KLHL13	31.1366	39.2018	45.9263	32.8829	0.980741	0.946561	0.870656	0.855253	0.729451	0.962537	-0.0740944	0.240187	0.458298	-0.21811	0.532392	0.314282
ENSG00000003137	CYP26B1	8.30373	4.32219	10.9966	5.49458	0.498163	0.845369	0.0886496	0.215231	0.675728	0.0386801	0.459247	-0.245423	0.794215	-1.03964	0.334968	-0.70467
ENSG00000003249	DBNDD1	7.1724	9.33726	6.00737	8.82759	0.750917	0.978474	0.364695	0.836306	0.849933	0.654903	-0.239341	0.0663598	-0.435312	0.501672	-0.195971	0.305701
ENSG00000003393	ALS2	3.68951	2.05371	3.55722	4.84717	0.765797	0.0215676	0.78287	0.172021	0.987195	0.419893	-0.267203	-0.756265	-0.301144	-0.45512	-0.0339411	-0.489062
ENSG00000003400	CASP10	1.08776	0.694964	0.799175	1.17282	0.980359	0.794159	0.697379	0.864478	0.828778	0.969892	-0.0392051	-0.2355	-0.180764	-0.0547357	-0.141559	-0.196295
ENSG00000003402	CFLAR	15.1973	22.3689	17.9633	13.884	0.942554	0.577899	0.697379	0.669857	0.851907	0.877886	0.114608	0.617467	0.329776	0.287691	0.215168	0.502859
ENSG00000003436	TFPI	33.125	32.4929	34.7578	25.9799	0.404814	0.724098	0.222361	0.988666	0.95632	0.954181	0.328107	0.301909	0.39366	-0.091751	0.0655522	-0.0261988
ENSG00000003509	NDUFAF7	19.2509	29.9488	19.9698	21.8474	0.973554	0.864464	0.980359	0.788891	0.991074	0.803625	-0.166308	0.42193	-0.11831	0.54024	0.0479978	0.588238
ENSG00000003756	RBM5	16.8737	14.632	12.4095	15.5402	0.984346	0.986922	0.935688	0.97166	0.902905	0.958719	0.105712	-0.0767035	-0.283645	0.206941	-0.389357	-0.182416
ENSG00000003987	MTMR7	0.211394	0.220597	0.216408	0.472023	0.56648	0.65352	0.584069	1	1	1	-0.160736	-0.154745	-0.157469	0.00272411	0.00326739	0.0059915
ENSG00000003989	SLC7A2	7.34964	7.32531	11.2739	4.57743	0.00818108	0.0309815	0.00176087	0.995976	0.00176087	0.0520673	0.507387	0.503628	1.013	-0.509369	0.50561	-0.00375913
ENSG00000004059	ARF5	119.284	91.6678	121.332	102.331	0.65243	0.818319	0.610177	0.242696	0.984848	0.202978	0.217221	-0.155543	0.241379	-0.396922	0.0241579	-0.372764
ENSG00000004139	SARM1	0.619767	0.447026	0.748907	0.306493	0.707317	0.916584	0.552655	0.932914	0.965544	0.835033	0.183738	0.0853285	0.253157	-0.167829	0.0694196	-0.0984091
ENSG00000004142	POLDIP2	179.924	177.084	182.241	181.285	0.989159	0.969892	0.991807	0.980873	0.983975	0.961635	-0.0107528	-0.0334523	0.00750543	-0.0409577	0.0182583	-0.0226994
ENSG00000004399	PLXND1	79.3296	86.7298	88.3027	74.9992	0.967415	0.891174	0.788918	0.955099	0.901839	0.990414	0.0789371	0.204575	0.229926	-0.0253504	0.150989	0.125638
ENSG00000004455	AK2	252.539	252.135	251.544	246.398	0.97488	0.976794	0.978474	0.997168	0.994029	0.996175	0.0352332	0.0329415	0.0295826	0.00335895	-0.00565059	-0.00229164
ENSG00000004478	FKBP4	426.607	401.513	454.829	388.007	0.745678	0.960197	0.405359	0.890825	0.869117	0.616803	0.136155	0.0491151	0.228154	-0.179039	0.0919988	-0.0870403
ENSG00000004487	KDM1A	141.768	115.683	141.444	119.065	0.605984	0.978824	0.622884	0.53897	0.996728	0.555569	0.247961	-0.0408759	0.244706	-0.285582	-0.00325497	-0.288837
ENSG00000004534	RBM6	25.957	62.2012	29.8234	29.0123	0.961961	0.653556	0.990414	0.600116	0.945674	0.669371	-0.149631	1.04976	0.0372475	1.01251	0.186878	1.19939
ENSG00000004660	CAMKK1	6.7871	5.48382	4.2072	8.30223	0.371501	0.00582385	0.00176087	0.378768	0.00324853	0.274176	-0.229498	-0.46111	-0.730942	0.269832	-0.501444	-0.231612
ENSG00000004700	RECQL	27.601	24.816	28.6102	25.4617	0.904655	0.984129	0.827106	0.909912	0.977121	0.858205	0.108225	-0.0343269	0.156592	-0.190918	0.0483666	-0.142552
ENSG00000004766	CCDC132	8.33608	33.3269	11.001	12.2494	0.504033	0.346727	0.950807	0.0771335	0.684701	0.262287	-0.463212	1.30987	-0.132279	1.44214	0.330933	1.77308
ENSG00000004776	HSPB6	0.208192	0.225148	0.203774	0.411439	0.661118	0.863702	0.654375	1	1	1	-0.127029	-0.115993	-0.129918	0.013925	-0.00288934	0.0110357
ENSG00000004777	ARHGAP33	2.04663	0.947326	1.56898	0.606698	0.0644441	0.873585	0.280182	0.708146	0.903192	0.852803	0.634497	0.177183	0.453288	-0.276105	-0.181209	-0.457314
ENSG00000004779	NDUFAB1	189.888	214.514	180.979	182.358	0.933756	0.380139	0.989889	0.59993	0.912942	0.341275	0.0577545	0.23195	-0.0108319	0.242782	-0.0685864	0.174196
ENSG00000004799	PDK4	1.65257	1.02862	1.19963	1.42111	0.858205	0.631946	0.866413	0.329155	0.561998	0.912167	0.0944474	-0.175804	-0.0965594	-0.0792445	-0.191007	-0.270251
ENSG00000004864	SLC25A13	77.2918	104.971	84.4234	110.209	0.43193	0.973675	0.547487	0.557568	0.944825	0.67856	-0.500945	-0.0689687	-0.376695	0.307726	0.12425	0.431976
ENSG00000004866	ST7	42.9835	41.4947	46.2533	33.9406	0.426135	0.72518	0.134009	0.982063	0.92542	0.901848	0.323781	0.275225	0.425013	-0.149788	0.101232	-0.0485563
ENSG00000004897	CDC27	87.3327	90.0577	103.241	87.1353	0.997873	0.982771	0.807713	0.984109	0.823448	0.876062	0.00319148	0.0465415	0.239628	-0.193087	0.236437	0.04335
ENSG00000004961	HCCS	117.271	98.027	123.586	93.7685	0.117869	0.934095	0.0241497	0.321783	0.901197	0.107511	0.31662	0.0627664	0.391053	-0.328286	0.0744323	-0.253854
ENSG00000004975	DVL2	27.9589	31.7834	31.8415	24.1248	0.694799	0.173218	0.171724	0.763836	0.766063	0.997375	0.197565	0.370895	0.373374	-0.00247899	0.175809	0.17333
ENSG00000005007	UPF1	24.5855	35.7303	21.7902	39.1199	0.00176087	0.79937	0.00176087	0.0426481	0.687911	0.00704704	-0.629197	-0.124113	-0.789469	0.665356	-0.160272	0.505084
ENSG00000005020	SKAP2	7.94764	3.03887	9.20093	3.93001	0.0867002	0.770198	0.0353284	0.00176087	0.926984	0.00176087	0.74632	-0.234934	0.917512	-1.15245	0.171192	-0.981254
ENSG00000005022	SLC25A5	828.744	707.179	870.062	746.69	0.756328	0.945904	0.556291	0.658966	0.937815	0.50221	0.150035	-0.0782187	0.220062	-0.298281	0.0700267	-0.228254
ENSG00000005059	CCDC109B	9.89749	6.55843	8.22385	6.08099	0.741847	0.986594	0.893954	0.81976	0.939386	0.942554	0.558053	0.0828141	0.339335	-0.256521	-0.218719	-0.475239
ENSG00000005073	HOXA11	4.54547	4.32637	2.71506	6.33564	0.21804	0.195921	0.00176087	0.970351	0.0661081	0.15163	-0.348796	-0.397915	-0.822017	0.424102	-0.473221	-0.0491189
ENSG00000005075	POLR2J	68.4348	64.0976	69.8492	69.0191	0.991544	0.897027	0.989042	0.919379	0.982307	0.86826	-0.0119187	-0.103609	0.016765	-0.120374	0.0286837	-0.0916905
ENSG00000005100	DHX33	19.7291	25.3547	20.1791	22.8288	0.896801	0.935769	0.930369	0.71577	0.989889	0.771217	-0.192386	0.139774	-0.162814	0.302588	0.0295724	0.33216
ENSG00000005102	MEOX1	1.42112	1.27902	2.66049	1.19589	0.919602	0.978891	0.0942448	0.961635	0.169805	0.0816533	0.098251	0.0370469	0.544264	-0.507217	0.446013	-0.061204
ENSG00000005156	LIG3	58.8384	82.5224	78.4819	76.3241	0.868254	0.965413	0.991807	0.603158	0.832506	0.978474	-0.364474	0.109877	0.0392081	0.0706694	0.403682	0.474352
ENSG00000005175	RPAP3	38.9053	28.5304	39.8422	35.4663	0.944762	0.776268	0.907026	0.618732	0.987652	0.536059	0.126694	-0.295347	0.159365	-0.454712	0.0326709	-0.422041
ENSG00000005189	AC004381.6	9.02981	18.0532	8.12666	5.51184	0.490404	0.437208	0.657826	0.675289	0.961123	0.626855	0.55417	1.41659	0.43092	0.985674	-0.12325	0.862425
ENSG00000005194	CIAPIN1	216.94	173.015	215.528	214.167	0.993509	0.925135	0.996629	0.893928	0.996175	0.91377	0.0183893	-0.304668	0.00905482	-0.313723	-0.00933444	-0.323057
ENSG00000005206	SPPL2B	16.659	21.3123	18.0246	24.1271	0.0386801	0.687911	0.116651	0.261835	0.895239	0.551709	-0.485675	-0.164456	-0.383774	0.219318	0.101902	0.32122
ENSG00000005238	FAM214B	4.56428	2.23591	2.66355	3.54811	0.748819	0.475113	0.712941	0.143632	0.278771	0.903852	0.24264	-0.389324	-0.250568	-0.138757	-0.493208	-0.631965
ENSG00000005302	MSL3	33.0201	32.5706	32.5061	30.8339	0.92893	0.969858	0.958787	0.990884	0.988409	0.998348	0.0929971	0.0743595	0.0716653	0.00269422	-0.0213318	-0.0186376
ENSG00000005339	CREBBP	44.8346	53.1617	42.1761	25.8625	0.557776	0.602867	0.585197	0.960361	0.98152	0.9212	0.74925	0.985342	0.664941	0.320401	-0.0843087	0.236092
ENSG00000005436	GCFC2	30.6521	25.8024	29.9602	20.495	0.493846	0.855253	0.476695	0.924516	0.989926	0.932454	0.537571	0.305605	0.506672	-0.201067	-0.0308993	-0.231966
ENSG00000005448	WDR54	2.11409	4.41153	3.2455	3.61154	0.398865	0.880634	0.963439	0.0919062	0.5687	0.74401	-0.447823	0.192272	-0.0973165	0.289588	0.350507	0.640095
ENSG00000005483	MLL5	9.43755	20.8423	10.0052	10.7012	0.914103	0.600329	0.974686	0.524088	0.979891	0.577729	-0.151187	0.846743	-0.0813054	0.928048	0.0698814	0.99793
ENSG00000005486	RHBDD2	65.4474	101.261	67.011	99.134	0.00176087	0.982307	0.00176087	0.121553	0.973554	0.160126	-0.584433	0.0300274	-0.55137	0.581397	0.0330635	0.614461
ENSG00000005700	IBTK	8.20393	11.0512	8.85695	9.49286	0.529854	0.514012	0.867158	0.0420311	0.84597	0.197724	-0.171613	0.183445	-0.082119	0.265564	0.089494	0.355058
ENSG00000005801	ZNF195	9.64369	13.6576	6.9569	13.725	0.437712	0.996071	0.0420311	0.482761	0.564201	0.0574364	-0.433512	-0.00619692	-0.811989	0.805792	-0.378477	0.427315
ENSG00000005810	MYCBP2	14.5472	41.0925	13.4124	11.2707	0.564589	0.370152	0.653142	0.512821	0.931421	0.467759	0.318343	1.69919	0.215847	1.48335	-0.102496	1.38085
ENSG00000005812	FBXL3	23.2393	34.2156	26.162	22.6363	0.978474	0.158073	0.633398	0.208025	0.762973	0.454522	0.0348863	0.555826	0.192964	0.362861	0.158078	0.520939
ENSG00000005882	PDK2	48.2204	54.7042	45.6714	51.1987	0.95547	0.964856	0.865125	0.88622	0.958787	0.789215	-0.0831175	0.0920646	-0.158267	0.250332	-0.0751495	0.175182
ENSG00000005884	ITGA3	189.553	208.648	184.597	207.591	0.965544	0.997171	0.95234	0.963306	0.989159	0.950257	-0.129833	0.00725745	-0.167651	0.174908	-0.0378178	0.137091
ENSG00000005889	ZFX	21.758	21.7732	15.2962	22.7788	0.979508	0.977469	0.280999	0.999533	0.445605	0.292236	-0.0606929	-0.0597702	-0.518651	0.458881	-0.457958	0.000922719
ENSG00000005893	LAMP2	22.1934	26.318	24.778	26.6257	0.404296	0.988034	0.872542	0.473136	0.739772	0.908678	-0.242697	-0.0155916	-0.0962628	0.0806712	0.146435	0.227106
ENSG00000005955	GGNBP2	46.6405	35.729	40.7453	37.2103	0.427904	0.978371	0.872184	0.630834	0.745707	0.872133	0.310925	-0.0555588	0.124533	-0.180092	-0.186392	-0.366484
ENSG00000006007	GDE1	112.969	153.404	105.859	142.033	0.232439	0.863715	0.0781487	0.061101	0.903546	0.0134839	-0.325154	0.109624	-0.417253	0.526877	-0.0920983	0.434779
ENSG00000006015	C19orf60	60.4216	41.622	52.7038	47.1136	0.908869	0.9751	0.973554	0.811417	0.958812	0.912083	0.345923	-0.171067	0.155518	-0.326585	-0.190404	-0.516989
ENSG00000006016	CRLF1	18.8693	50.1153	22.1941	32.2052	0.726262	0.877972	0.8693	0.580508	0.966127	0.69097	-0.712833	0.607491	-0.49956	1.10705	0.213273	1.32032
ENSG00000006025	OSBPL7	1.28411	2.22927	0.897227	1.47787	0.961924	0.65003	0.661918	0.650889	0.875721	0.29042	-0.0827016	0.282205	-0.263531	0.545736	-0.18083	0.364906
ENSG00000006062	MAP3K14	14.3937	11.0251	12.7826	9.96886	0.0848972	0.869543	0.409842	0.313423	0.807523	0.72739	0.453856	0.122009	0.304614	-0.182606	-0.149241	-0.331847
ENSG00000006114	SYNRG	7.42098	12.841	6.80958	10.9514	0.232127	0.883614	0.0942448	0.29156	0.932204	0.186845	-0.459159	0.19648	-0.555963	0.752443	-0.0968039	0.655639
ENSG00000006118	TMEM132A	35.058	33.0969	34.1601	28.2851	0.89746	0.935729	0.899829	0.982307	0.990414	0.98902	0.291177	0.212735	0.25579	-0.0430551	-0.0353864	-0.0784414
ENSG00000006125	AP2B1	122.021	59.0091	129.504	63.1121	0.0163159	0.969205	0.0104001	0.0144433	0.958765	0.00582385	0.929587	-0.0939012	1.01411	-1.10801	0.0845223	-1.02349
ENSG00000006194	ZNF263	31.2302	22.9255	27.5942	30.4725	0.981114	0.444968	0.855015	0.382965	0.780777	0.705873	0.0332765	-0.381596	-0.133904	-0.247692	-0.167181	-0.414873
ENSG00000006282	SPATA20	11.4399	20.5258	13.3655	17.9603	0.0114792	0.899559	0.329155	0.650714	0.720808	0.731073	-0.570611	0.174445	-0.377439	0.551884	0.193172	0.745056
ENSG00000006327	TNFRSF12A	273.453	283.445	287.849	228.996	0.522102	0.299931	0.314483	0.961635	0.942554	0.984755	0.253938	0.305345	0.327434	-0.0220887	0.0734953	0.0514066
ENSG00000006432	MAP3K9	2.25558	1.82018	1.81702	2.54285	0.833751	0.330723	0.185598	0.671053	0.592168	0.99805	-0.0942419	-0.249957	-0.251151	0.00119387	-0.156909	-0.155715
ENSG00000006451	RALA	51.2903	34.0782	48.4578	47.2522	0.973213	0.705596	0.990414	0.607637	0.982307	0.729088	0.113685	-0.449061	0.0348891	-0.48395	-0.0787956	-0.562746
ENSG00000006453	BAIAP2L1	28.0962	19.9478	28.0354	22.4429	0.484408	0.912872	0.491041	0.582854	0.997168	0.58732	0.300166	-0.155339	0.297248	-0.452588	-0.00291746	-0.455505
ENSG00000006459	JHDM1D	1.34073	1.04654	2.42349	1.16861	0.967095	0.977944	0.530881	0.901374	0.540609	0.33608	0.0763133	-0.0566784	0.481335	-0.538013	0.405022	-0.132992
ENSG00000006530	AGK	6.275	2.29486	7.3408	2.34527	0.139336	0.994021	0.0728869	0.438546	0.934563	0.346342	0.929313	-0.0168347	1.1041	-1.12094	0.174787	-0.946148
ENSG00000006534	ALDH3B1	32.7315	49.0128	33.6968	49.3355	0.00582385	0.992831	0.0163159	0.0215676	0.97603	0.045264	-0.563712	-0.00909755	-0.524162	0.515065	0.03955	0.554615
ENSG00000006576	PHTF2	13.9799	15.4048	14.1024	13.0349	0.954468	0.828116	0.946561	0.939858	0.993509	0.950005	0.0879431	0.21117	0.0989605	0.11221	0.0110174	0.123227
ENSG00000006606	CCL26	1.27578	0.575984	1.10711	1.2998	0.993867	0.732279	0.963477	0.749215	0.971073	0.814423	-0.0105401	-0.357255	-0.0868053	-0.27045	-0.0762652	-0.346715
ENSG00000006607	FARP2	15.892	28.3664	17.9811	22.1903	0.832485	0.875599	0.936126	0.461235	0.969978	0.669012	-0.435114	0.328047	-0.275793	0.60384	0.159321	0.763161
ENSG00000006611	USH1C	1.27841	3.41724	1.41565	5.13124	0.142348	0.921155	0.194673	0.592909	0.970592	0.639584	-1.12116	-0.396595	-1.06199	0.665398	0.0591639	0.724562
ENSG00000006625	GGCT	67.316	80.5633	67.8047	74.0977	0.919538	0.945377	0.931481	0.791862	0.994029	0.80493	-0.134664	0.117648	-0.124529	0.242176	0.0101358	0.252312
ENSG00000006634	DBF4	43.2634	35.7015	29.9188	37.6112	0.807235	0.966346	0.700339	0.704702	0.423311	0.818976	0.192437	-0.0712865	-0.311502	0.240216	-0.503939	-0.263723
ENSG00000006638	TBXA2R	25.9066	15.1531	28.0312	13.4731	0.00176087	0.79828	0.00176087	0.00176087	0.852955	0.00176087	0.850844	0.148707	0.9567	-0.807993	0.105856	-0.702137
ENSG00000006652	IFRD1	27.8539	35.6012	27.1397	38.3675	0.562902	0.962197	0.373293	0.810106	0.988328	0.726731	-0.435275	-0.102416	-0.470208	0.367793	-0.0349334	0.332859
ENSG00000006695	COX10	18.6481	22.1993	20.0634	20.1454	0.896463	0.858083	0.994716	0.619136	0.906859	0.849719	-0.100998	0.127958	-0.00535193	0.13331	0.0956461	0.228956
ENSG00000006704	GTF2IRD1	43.6708	31.5367	42.3187	31.6531	0.534086	0.997207	0.597736	0.530989	0.983975	0.585493	0.440533	-0.00499867	0.397176	-0.402175	-0.0433565	-0.445531
ENSG00000006712	PAF1	47.6492	49.256	49.0074	57.5095	0.219452	0.390552	0.363718	0.954462	0.964763	0.992487	-0.26135	-0.215399	-0.222413	0.00701433	0.0389361	0.0459504
ENSG00000006715	VPS41	23.9454	31.3957	34.1553	28.2574	0.87218	0.971119	0.885427	0.862677	0.624249	0.980236	-0.221809	0.142374	0.256919	-0.114545	0.478728	0.364184
ENSG00000006744	ELAC2	173.286	158.844	175.285	185.119	0.943472	0.76735	0.961635	0.919602	0.991307	0.904344	-0.0942453	-0.218294	-0.0778856	-0.140408	0.0163597	-0.124049
ENSG00000006757	PNPLA4	44.7569	57.1015	51.5152	52.3045	0.684334	0.922069	0.988008	0.5931	0.732716	0.897727	-0.215892	0.122123	-0.021123	0.143246	0.194769	0.338015
ENSG00000006831	ADIPOR2	59.1194	51.9311	54.1183	44.1724	0.419893	0.818319	0.640633	0.884254	0.920989	0.978474	0.4046	0.224087	0.281441	-0.0573538	-0.123159	-0.180513
ENSG00000006837	CDKL3	1.55841	0.903332	1.74024	2.22652	0.908005	0.566441	0.957451	0.816178	0.983597	0.778785	-0.248238	-0.541761	-0.176339	-0.365421	0.0718981	-0.293523
ENSG00000007038	PRSS21	183.426	154.616	196.913	160.731	0.673014	0.966783	0.41124	0.611337	0.894497	0.378176	0.188354	-0.0552575	0.289648	-0.344906	0.101294	-0.243612
ENSG00000007047	MARK4	22.7726	21.0364	26.5645	24.5091	0.971119	0.94016	0.96566	0.97736	0.903006	0.87096	-0.0977424	-0.202572	0.107736	-0.310308	0.205478	-0.10483
ENSG00000007080	CCDC124	318.954	271.058	311.113	316.098	0.98902	0.447412	0.982307	0.404814	0.972906	0.54575	0.0128952	-0.220264	-0.0227879	-0.197476	-0.0356831	-0.233159
ENSG00000007168	PAFAH1B1	160.503	117.76	166.891	107.115	0.00931705	0.829325	0.00176087	0.073984	0.964318	0.0309815	0.574617	0.134297	0.630243	-0.495946	0.0556261	-0.44032
ENSG00000007202	KIAA0100	127.641	94.2536	120.336	99.0657	0.815889	0.978474	0.875119	0.653188	0.977955	0.723641	0.359229	-0.070381	0.275556	-0.345937	-0.083673	-0.42961
ENSG00000007237	GAS7	2.43686	2.12727	1.60531	4.43189	0.533126	0.472999	0.226461	0.970351	0.811189	0.923212	-0.535704	-0.640055	-0.835119	0.195065	-0.299416	-0.104351
ENSG00000007255	TRAPPC6A	6.77355	25.6211	7.73012	18.4546	0.433515	0.827387	0.532649	0.271016	0.981418	0.370814	-1.22119	0.433345	-1.0719	1.50524	0.149297	1.65454
ENSG00000007264	MATK	89.561	95.4387	91.5517	81.9519	0.793634	0.698743	0.70314	0.92542	0.977944	0.964318	0.12517	0.214932	0.156201	0.058731	0.0310307	0.0897617
ENSG00000007341	ST7L	45.2132	72.1809	50.5576	46.7112	0.987186	0.696178	0.972133	0.661767	0.952353	0.799107	-0.0450633	0.606794	0.109646	0.497148	0.154709	0.651858
ENSG00000007372	PAX6	16.791	7.96694	11.3013	14.5669	0.964691	0.763029	0.923898	0.641517	0.806261	0.911801	0.181738	-0.733081	-0.316736	-0.416345	-0.498475	-0.914819
ENSG00000007376	RPUSD1	70.4474	51.7519	66.0482	58.0764	0.423506	0.76377	0.703307	0.07918	0.903713	0.242696	0.270136	-0.160483	0.179759	-0.340241	-0.0903769	-0.430618
ENSG00000007384	RHBDF1	6.0647	5.18085	4.91163	5.15634	0.865302	0.996639	0.978474	0.90775	0.810968	0.97978	0.172399	0.00493269	-0.0501959	0.0551286	-0.222595	-0.167466
ENSG00000007392	LUC7L	54.4092	87.7062	63.8321	81.2196	0.00176087	0.908067	0.277375	0.0225126	0.611288	0.254772	-0.560993	0.108284	-0.338132	0.446416	0.222861	0.669277
ENSG00000007516	BAIAP3	0.186839	0.525332	0.562353	0.875735	0.0605625	0.79369	0.841417	0.305354	0.252344	0.987606	-0.395084	-0.187458	-0.166461	-0.0209962	0.228622	0.207626
ENSG00000007520	TSR3	213.785	192.951	210.707	233.635	0.72273	0.158073	0.640464	0.66509	0.982287	0.73787	-0.126959	-0.273442	-0.147686	-0.125756	-0.0207271	-0.146483
ENSG00000007541	PIGQ	73.9346	97.7234	67.2295	99.096	0.472068	0.992501	0.29042	0.554297	0.855754	0.371994	-0.412897	-0.0197219	-0.546267	0.526545	-0.13337	0.393175
ENSG00000007545	CRAMP1L	16.2712	91.9075	14.6968	15.9342	0.995476	0.179056	0.987983	0.179879	0.984755	0.14327	0.026858	2.38853	-0.103142	2.49167	-0.13	2.36167
ENSG00000007866	TEAD3	11.8963	14.729	12.9558	16.2027	0.368567	0.937815	0.611038	0.747838	0.92542	0.891085	-0.389452	-0.121801	-0.283447	0.161646	0.106004	0.26765
ENSG00000007923	DNAJC11	128.746	134.327	112.048	127.229	0.993501	0.98152	0.933297	0.985455	0.929541	0.912083	0.016837	0.0771415	-0.180289	0.25743	-0.197126	0.0603045
ENSG00000007944	MYLIP	1.16198	1.32906	0.629773	0.948255	0.868453	0.716283	0.631768	0.938307	0.278565	0.150822	0.100967	0.175254	-0.164923	0.340177	-0.26589	0.0742866
ENSG00000007968	E2F2	6.6104	4.41969	5.01295	4.88971	0.284836	0.815467	0.978474	0.0991657	0.338159	0.713774	0.321637	-0.10194	0.0255782	-0.127518	-0.296059	-0.423577
ENSG00000008018	PSMB1	292.217	302.039	298.924	288.186	0.981477	0.89721	0.934844	0.945556	0.969892	0.986016	0.0199027	0.0672785	0.0524213	0.0148572	0.0325186	0.0473758
ENSG00000008083	JARID2	6.05773	9.25156	6.30868	9.94509	0.00176087	0.868594	0.00176087	0.00176087	0.955102	0.00176087	-0.567972	-0.0862927	-0.523727	0.437434	0.0442458	0.48168
ENSG00000008086	CDKL5	5.80284	5.01626	6.8097	3.52423	0.157395	0.478998	0.00176087	0.9028	0.818319	0.553366	0.498226	0.344929	0.67332	-0.328391	0.175094	-0.153297
ENSG00000008128	CDK11A	11.0613	9.3209	10.0102	10.7353	0.987652	0.938504	0.966122	0.927923	0.94835	0.975707	0.0364656	-0.169844	-0.0845728	-0.0852715	-0.121038	-0.20631
ENSG00000008130	NADK	53.6099	57.5887	56.7194	48.8796	0.970588	0.852803	0.950264	0.968196	0.986275	0.992469	0.128254	0.227951	0.20675	0.0212015	0.0784955	0.099697
ENSG00000008256	CYTH3	11.8412	16.7662	14.4878	13.2553	0.932252	0.844159	0.965215	0.673458	0.844884	0.948239	-0.140342	0.298826	0.112088	0.186738	0.25243	0.439168
ENSG00000008277	ADAM22	2.07857	1.12711	1.67737	1.84529	0.970653	0.631768	0.977955	0.530667	0.934885	0.767405	0.084971	-0.298262	-0.0644181	-0.233844	-0.149389	-0.383233
ENSG00000008282	SYPL1	67.2438	60.9972	67.9007	57.01	0.699009	0.949595	0.680331	0.904119	0.991807	0.890058	0.230725	0.0943282	0.244347	-0.150019	0.013622	-0.136397
ENSG00000008283	CYB561	40.2208	17.295	32.6894	15.823	0.00176087	0.946561	0.00176087	0.00176087	0.644195	0.0215676	1.24421	0.114487	0.960755	-0.846268	-0.283459	-1.12973
ENSG00000008294	SPAG9	35.3851	52.8604	30.037	22.6394	0.313592	0.379943	0.224063	0.744819	0.744819	0.581288	0.601496	1.1548	0.378772	0.776026	-0.222724	0.553302
ENSG00000008300	CELSR3	0.585012	0.365413	0.731258	0.689524	0.955492	0.624231	0.988951	0.773893	0.953745	0.733894	-0.0571799	-0.185259	0.0222147	-0.207474	0.0793946	-0.128079
ENSG00000008323	PLEKHG6	0.168278	1.2401	0.167756	0.345975	0.538129	0.0400065	0.506227	0.00324853	1	0.00704704	-0.113638	0.465851	-0.113985	0.579836	-0.000347362	0.579489
ENSG00000008324	SS18L2	13.0015	13.1086	10.7868	11.5862	0.955255	0.956302	0.97736	0.995976	0.892238	0.895337	0.142965	0.153228	-0.0874867	0.240715	-0.230451	0.0102632
ENSG00000008382	MPND	21.8882	19.9626	26.3211	25.2311	0.912771	0.728388	0.983261	0.948983	0.877713	0.682056	-0.188957	-0.310206	0.056622	-0.366828	0.245579	-0.121249
ENSG00000008394	MGST1	1454.83	1380.39	1421.43	1207.7	0.592081	0.796967	0.659799	0.961635	0.982307	0.97978	0.268183	0.192515	0.234722	-0.0422069	-0.033461	-0.0756679
ENSG00000008405	CRY1	10.4828	11.3619	10.6823	8.3695	0.36816	0.437208	0.384007	0.922913	0.984675	0.958222	0.267595	0.365779	0.29047	0.0753088	0.0228748	0.0981836
ENSG00000008441	NFIX	5.57323	5.36242	3.66881	3.71806	0.918409	0.935769	0.995616	0.993102	0.832716	0.867262	0.405383	0.364654	-0.0124798	0.377134	-0.417863	-0.0407287
ENSG00000008513	ST3GAL1	16.3309	10.5751	12.6767	9.32229	0.045264	0.893564	0.518791	0.266753	0.661422	0.828544	0.695112	0.151404	0.374362	-0.222958	-0.32075	-0.543708
ENSG00000008516	MMP25	0.696243	0.507361	0.367664	0.325522	0.904632	0.971162	0.990113	0.975812	0.917537	0.977816	0.213396	0.108615	0.0259098	0.0827054	-0.187486	-0.104781
ENSG00000008517	IL32	7.95369	9.58799	13.5161	6.36635	0.854871	0.806073	0.100078	0.93308	0.213466	0.786719	0.250633	0.46996	0.891096	-0.421136	0.640463	0.219327
ENSG00000008710	PKD1	15.2645	10.802	15.8168	10.3545	0.697502	0.987652	0.713285	0.74865	0.98902	0.757958	0.482772	0.0513326	0.528202	-0.476869	0.0454297	-0.431439
ENSG00000008735	MAPK8IP2	0.466693	0.411755	0.525172	0.782819	0.637264	0.684864	0.739355	0.978474	0.973657	0.942554	-0.173969	-0.206464	-0.140165	-0.0662983	0.0338035	-0.0324948
ENSG00000008838	MED24	117.562	154.965	126.54	105.315	0.893218	0.61998	0.704275	0.755465	0.940136	0.824193	0.155907	0.548591	0.260366	0.288226	0.104458	0.392684
ENSG00000008853	RHOBTB2	23.9091	18.8919	17.2348	14.7693	0.343967	0.836634	0.896801	0.871878	0.684593	0.972316	0.627636	0.317121	0.197896	0.119225	-0.42974	-0.310515
ENSG00000008869	HEATR5B	4.82954	3.82994	4.81734	4.48112	0.954643	0.782863	0.940272	0.573897	0.997108	0.447651	0.0755453	-0.152762	0.0729658	-0.225728	-0.00257947	-0.228307
ENSG00000008952	SEC62	275.511	367.117	268.396	333.82	0.663224	0.917367	0.590666	0.455504	0.982624	0.399089	-0.275143	0.13639	-0.312614	0.449004	-0.0374711	0.411533
ENSG00000008988	RPS20	3117.35	2871.32	3193.13	3148.3	0.986677	0.712215	0.981782	0.761075	0.968137	0.629131	-0.0142438	-0.132771	0.0203854	-0.153156	0.0346292	-0.118527
ENSG00000009307	CSDE1	876.963	740.49	940.371	667.817	0.357433	0.867816	0.174535	0.642615	0.926123	0.383625	0.392035	0.148605	0.492528	-0.343924	0.100493	-0.243431
ENSG00000009335	UBE3C	29.8697	33.5133	32.0203	31.0468	0.976767	0.943554	0.978474	0.880519	0.936126	0.972671	-0.0523251	0.103849	0.0418853	0.0619636	0.0942104	0.156174
ENSG00000009413	REV3L	7.31748	2.29449	6.62941	6.02375	0.952425	0.346727	0.981129	0.073984	0.976794	0.0628294	0.215663	-0.90179	0.104985	-1.00678	-0.110678	-1.11745
ENSG00000009780	FAM76A	1.8194	0.758923	1.63945	1.70764	0.979852	0.319069	0.986378	0.262512	0.963831	0.350977	0.0428448	-0.426396	-0.0267807	-0.399615	-0.0696256	-0.469241
ENSG00000009790	TRAF3IP3	1.35546	0.577453	0.780043	1.50952	0.981782	0.597413	0.681921	0.721833	0.813575	0.945005	-0.0647632	-0.445328	-0.336167	-0.109161	-0.271403	-0.380564
ENSG00000009830	POMT2	38.7331	74.4257	50.0996	51.9735	0.689426	0.728347	0.982852	0.417118	0.728541	0.676658	-0.40605	0.501807	-0.0509789	0.552786	0.355071	0.907856
ENSG00000009844	VTA1	34.8803	38.5526	37.3472	34.2216	0.981647	0.718173	0.818319	0.796967	0.887395	0.96975	0.0260001	0.162944	0.119411	0.0435334	0.0934106	0.136944
ENSG00000009950	MLXIPL	0.292037	0.408724	0.367269	0.958039	0.221132	0.721852	0.512321	0.911904	0.941885	0.985364	-0.368011	-0.296372	-0.321417	0.0250454	0.0465933	0.0716388
ENSG00000009954	BAZ1B	53.5664	52.8289	53.2287	53.1691	0.988987	0.991019	0.99714	0.982897	0.990145	0.989889	0.0103523	-0.00892392	0.00155772	-0.0104816	-0.00879461	-0.0192762
ENSG00000010017	RANBP9	44.1404	49.0279	48.8311	39.2657	0.920463	0.790393	0.752627	0.945556	0.938106	0.997108	0.161087	0.306343	0.300768	0.00557482	0.139681	0.145256
ENSG00000010072	SPRTN	11.0883	10.4173	9.18338	8.18787	0.612743	0.791241	0.925527	0.977469	0.828544	0.932336	0.361425	0.285499	0.134504	0.150995	-0.226921	-0.0759262
ENSG00000010165	METTL13	56.6859	73.3585	55.473	59.6346	0.939012	0.392517	0.901266	0.17518	0.9812	0.189703	-0.0707265	0.29003	-0.100856	0.390886	-0.0301296	0.360756
ENSG00000010244	ZNF207	105.478	75.8207	111.315	71.6198	0.00176087	0.904069	0.00176087	0.0114792	0.885827	0.00176087	0.545876	0.0800601	0.622173	-0.542113	0.0762975	-0.465816
ENSG00000010256	UQCRC1	426.426	558.288	426.516	395.919	0.864431	0.195582	0.874854	0.372659	0.999581	0.392862	0.106571	0.493694	0.106874	0.38682	0.000303037	0.387123
ENSG00000010270	STARD3NL	15.824	16.4262	15.5135	16.7025	0.957671	0.9884	0.929559	0.977944	0.986562	0.960361	-0.06941	-0.0214726	-0.0947637	0.0732911	-0.0253537	0.0479374
ENSG00000010278	CD9	119.93	98.4686	116.946	100.084	0.257289	0.981727	0.40286	0.22791	0.970124	0.348291	0.256296	-0.0230121	0.22055	-0.243562	-0.0357464	-0.279308
ENSG00000010292	NCAPD2	174.831	220.241	192.746	202.906	0.947758	0.97736	0.985357	0.884398	0.973349	0.956501	-0.212591	0.117163	-0.0733685	0.190531	0.139222	0.329754
ENSG00000010318	PHF7	0.990602	0.572994	0.912054	1.00638	0.996151	0.823512	0.985455	0.806073	0.985772	0.854337	-0.00759145	-0.224579	-0.0459903	-0.178589	-0.0383988	-0.216988
ENSG00000010322	NISCH	7.26669	16.3115	7.0504	7.44481	0.986677	0.582854	0.970355	0.56648	0.985759	0.545797	-0.0274677	0.955156	-0.0615402	1.0167	-0.0340726	0.982624
ENSG00000010327	STAB1	0.0672481	0.587439	0.0028849	0.106389	1	0.611243	1	0.463101	1	0.0445736	-0.0270603	0.296753	-0.0726924	0.369445	-0.045632	0.323813
ENSG00000010404	IDS	8.83972	13.4203	9.0706	10.6223	0.787134	0.832674	0.831187	0.642615	0.986275	0.665646	-0.219647	0.288856	-0.189241	0.478097	0.0304059	0.508503
ENSG00000010539	ZNF200	12.1481	21.9775	12.8439	14.6882	0.456896	0.0771335	0.687221	0.00176087	0.937317	0.00324853	-0.23822	0.522853	-0.168958	0.691811	0.0692619	0.761073
ENSG00000010626	LRRC23	3.8197	7.77195	4.2565	6.18074	0.761982	0.942554	0.835795	0.630622	0.977944	0.692791	-0.491287	0.256415	-0.386876	0.643291	0.104411	0.747702
ENSG00000010704	HFE	7.74485	15.9669	8.68602	7.16838	0.941207	0.166014	0.709862	0.24347	0.885317	0.369011	0.0879731	0.970603	0.220986	0.749617	0.133013	0.88263
ENSG00000010803	SCMH1	13.4327	16.7426	14.2543	13.6012	0.991807	0.848278	0.974567	0.841715	0.966709	0.897399	-0.0156665	0.264664	0.0591644	0.2055	0.0748309	0.280331
ENSG00000010810	FYN	279.219	228.219	280.587	226.17	0.210994	0.990385	0.1851	0.32998	0.993229	0.308036	0.301585	0.0128978	0.308586	-0.295688	0.00700103	-0.288687
ENSG00000010818	HIVEP2	1.4032	7.07804	5.16015	2.10217	0.0996684	0.00176087	0.00324853	0.00176087	0.00176087	0.454641	-0.269495	1.14599	0.803603	0.342391	1.0731	1.41549
ENSG00000011007	TCEB3	18.3565	18.6727	18.3099	20.1183	0.783351	0.835568	0.771031	0.9812	0.995872	0.977944	-0.119751	-0.0975137	-0.123057	0.0255437	-0.0033064	0.0222373
ENSG00000011009	LYPLA2	97.8416	63.5793	98.8201	86.7082	0.853633	0.418537	0.807167	0.191181	0.992159	0.157045	0.170574	-0.435827	0.184644	-0.620471	0.0140703	-0.606401
ENSG00000011021	CLCN6	1.24606	1.21919	0.866391	1.49423	0.914266	0.930514	0.466724	0.992469	0.675783	0.801027	-0.106285	-0.118277	-0.285739	0.167462	-0.179454	-0.0119919
ENSG00000011028	MRC2	4.24193	8.62272	3.97925	7.99329	0.00176087	0.880446	0.00176087	0.00176087	0.938433	0.00176087	-0.678968	0.0881216	-0.740995	0.829117	-0.0620276	0.767089
ENSG00000011052	NME2	785.053	1017.21	710.784	906.977	0.846281	0.918781	0.843398	0.514855	0.940488	0.655181	-0.207783	0.165136	-0.350779	0.515914	-0.142996	0.372919
ENSG00000011105	TSPAN9	3.8351	3.41356	3.99012	5.381	0.815103	0.61729	0.829602	0.965544	0.98902	0.938811	-0.339059	-0.447239	-0.301231	-0.146007	0.0378275	-0.10818
ENSG00000011114	BTBD7	9.02813	8.81274	11.1136	9.9521	0.986145	0.967863	0.984153	0.992487	0.974957	0.923791	-0.116076	-0.144532	0.1338	-0.278332	0.249876	-0.028456
ENSG00000011132	APBA3	12.5428	19.447	12.1805	12.8713	0.985622	0.602867	0.970145	0.594792	0.986071	0.567045	-0.0322257	0.528245	-0.0686224	0.596867	-0.0363967	0.560471
ENSG00000011143	MKS1	10.1025	27.1295	12.9187	13.3307	0.63969	0.379076	0.984848	0.125205	0.766688	0.350654	-0.341118	0.926057	-0.0393017	0.965359	0.301817	1.26718
ENSG00000011198	ABHD5	13.75	14.2377	15.5125	9.78891	0.324907	0.538024	0.101604	0.983432	0.864978	0.952303	0.417921	0.461917	0.570955	-0.109038	0.153033	0.0439955
ENSG00000011243	AKAP8L	96.9462	109.573	85.1081	77.7948	0.603497	0.576964	0.916305	0.913413	0.834061	0.716059	0.31035	0.483621	0.126512	0.357109	-0.183837	0.173272
ENSG00000011258	MBTD1	2.13816	3.67933	2.09132	2.51574	0.735254	0.136753	0.713171	0.00704704	0.986275	0.0207025	-0.125973	0.330758	-0.142396	0.473154	-0.016423	0.456731
ENSG00000011260	UTP18	89.6355	124.912	98.0726	91.1758	0.982999	0.597117	0.872133	0.577729	0.818976	0.698888	-0.0240487	0.445801	0.10302	0.342781	0.127068	0.46985
ENSG00000011275	RNF216	24.8267	26.6775	25.4471	21.3325	0.697135	0.690338	0.619704	0.963775	0.985622	0.978383	0.201329	0.297578	0.234313	0.0632655	0.0329841	0.0962497
ENSG00000011295	TTC19	11.2869	16.6125	10.3495	15.9304	0.635666	0.982307	0.476718	0.543181	0.968196	0.387433	-0.432403	0.0538642	-0.537955	0.591819	-0.105552	0.486267
ENSG00000011304	PTBP1	1059.93	911.703	1092.6	907.35	0.846184	0.996175	0.778931	0.837307	0.983321	0.768029	0.223781	0.00688961	0.267496	-0.260607	0.0437151	-0.216891
ENSG00000011332	DPF1	3.30103	6.54633	2.69086	7.62947	0.0459494	0.911314	0.00704704	0.147738	0.884884	0.0483894	-0.861184	-0.172151	-1.0376	0.865453	-0.17642	0.689032
ENSG00000011347	SYT7	7.87192	5.99327	7.00453	7.62742	0.982287	0.456334	0.914133	0.485679	0.877743	0.703307	0.0361815	-0.268363	-0.0964983	-0.171865	-0.13268	-0.304545
ENSG00000011376	LARS2	19.4549	30.6323	19.179	31.8028	0.0568633	0.978474	0.201315	0.125205	0.991807	0.281151	-0.655836	-0.0508421	-0.674508	0.623666	-0.0186727	0.604993
ENSG00000011405	PIK3C2A	14.3895	11.7211	12.9405	13.5862	0.986378	0.966486	0.988513	0.930301	0.973426	0.976075	0.0725026	-0.183873	-0.0610408	-0.122832	-0.133543	-0.256376
ENSG00000011422	PLAUR	52.907	47.5389	71.0554	34.2806	0.0114792	0.194144	0.00176087	0.827408	0.0712334	0.0490283	0.597792	0.449364	1.00979	-0.560429	0.412001	-0.148428
ENSG00000011426	ANLN	87.629	100.699	109.774	84.04	0.97736	0.783956	0.51211	0.86602	0.63282	0.939503	0.0589581	0.255343	0.377505	-0.122163	0.318547	0.196385
ENSG00000011451	WIZ	30.7489	30.5518	34.5997	32.7637	0.95234	0.952106	0.966077	0.993412	0.821909	0.836429	-0.0861352	-0.0948443	0.0742502	-0.169095	0.160385	-0.00870913
ENSG00000011454	RABGAP1	10.1931	9.31667	12.3988	10.3093	0.993189	0.939625	0.800087	0.954816	0.794939	0.612363	-0.0136838	-0.121299	0.2262	-0.347499	0.239884	-0.107615
ENSG00000011465	DCN	0.478592	3.40891	1.2805	1.37579	0.0400065	0.0848972	0.97983	0.00176087	0.0831236	0.0756099	-0.445704	0.680113	-0.0413094	0.721422	0.404395	1.12582
ENSG00000011478	QPCTL	22.7019	37.5018	19.7915	29.9605	0.747308	0.81318	0.390016	0.438992	0.921986	0.126907	-0.371668	0.305628	-0.552524	0.858153	-0.180857	0.677296
ENSG00000011485	PPP5C	107.194	96.0288	110.974	105.872	0.99082	0.920761	0.97126	0.897727	0.978474	0.855591	0.0175731	-0.138043	0.0666703	-0.204713	0.0490972	-0.155616
ENSG00000011523	CEP68	4.28651	3.69807	3.58035	4.51899	0.983975	0.877886	0.859951	0.946525	0.936404	0.989056	-0.0523891	-0.194175	-0.224293	0.0301177	-0.171904	-0.141786
ENSG00000011566	MAP4K3	10.1535	13.5645	7.23954	8.17262	0.889351	0.573183	0.945173	0.865563	0.736673	0.40472	0.256681	0.613568	-0.138798	0.752366	-0.395479	0.356887
ENSG00000011638	TMEM159	7.75888	11.8546	10.4026	7.62399	0.991322	0.450994	0.588702	0.48491	0.637397	0.923836	0.0200804	0.525658	0.365936	0.159722	0.345855	0.505578
ENSG00000011677	GABRA3	2.79593	3.24514	2.97246	3.13343	0.923575	0.984967	0.97736	0.929129	0.977944	0.970335	-0.0981125	0.0310582	-0.0459633	0.0770215	0.0521492	0.129171
ENSG00000012048	BRCA1	23.4781	34.4181	26.0478	22.4513	0.976026	0.614644	0.80164	0.672667	0.908207	0.758133	0.0593465	0.574744	0.197976	0.376768	0.13863	0.515398
ENSG00000012061	ERCC1	136.456	134.433	131.252	78.4816	0.108384	0.639823	0.118782	0.993489	0.981083	0.99087	0.782697	0.761462	0.727426	0.0340355	-0.0552704	-0.0212349
ENSG00000012124	CD22	0.876328	4.28936	1.0313	1.31367	0.64228	0.0287552	0.828029	0.00176087	0.92893	0.00324853	-0.204202	0.924483	-0.128493	1.05298	0.0757084	1.12869
ENSG00000012171	SEMA3B	14.2554	20.2515	17.1538	18.9168	0.193182	0.924516	0.849493	0.0786989	0.552326	0.649381	-0.363743	0.0892404	-0.127032	0.216272	0.236712	0.452984
ENSG00000012174	MBTPS2	19.8549	23.8712	19.223	23.3988	0.365667	0.977469	0.197927	0.241894	0.958787	0.117103	-0.216804	0.0265866	-0.259132	0.285718	-0.0423282	0.24339
ENSG00000012211	PRICKLE3	26.6785	23.7649	32.9688	25.3993	0.985472	0.982287	0.860982	0.966778	0.903096	0.823294	0.0658305	-0.088732	0.351929	-0.440661	0.286099	-0.154563
ENSG00000012232	EXTL3	15.576	13.3377	16.1814	14.8594	0.979852	0.940073	0.957671	0.889243	0.983545	0.825283	0.0600536	-0.136471	0.10891	-0.245381	0.0488565	-0.196525
ENSG00000012660	ELOVL5	48.011	42.8907	45.3157	40.782	0.329028	0.922801	0.655191	0.676494	0.877513	0.908869	0.225242	0.0694127	0.145315	-0.0759024	-0.0799265	-0.155829
ENSG00000012822	CALCOCO1	6.28274	10.9125	6.3294	7.22945	0.91167	0.482498	0.909181	0.241367	0.995198	0.216286	-0.156137	0.484452	-0.148032	0.632484	0.00810447	0.640588
ENSG00000012963	UBR7	12.2211	12.8685	14.1363	12.4835	0.986229	0.983975	0.897606	0.962746	0.799937	0.929198	-0.0263772	0.0378488	0.1559	-0.118051	0.182277	0.064226
ENSG00000012983	MAP4K5	17.9661	14.7875	17.3328	16.3285	0.970335	0.970806	0.982624	0.90208	0.98902	0.940136	0.123464	-0.126701	0.0769619	-0.203663	-0.046502	-0.250165
ENSG00000013275	PSMC4	147.962	134.86	160.131	131.031	0.512732	0.961924	0.134378	0.709634	0.77804	0.29042	0.172834	0.0409384	0.285397	-0.244459	0.112563	-0.131896
ENSG00000013288	MAN2B2	1.31326	1.31948	1.35133	1.57791	0.80794	0.860121	0.847695	0.996836	0.986071	0.98997	-0.110866	-0.10816	-0.0943833	-0.0137765	0.0164823	0.00270584
ENSG00000013306	SLC25A39	378.908	420.153	390.745	390.848	0.955336	0.82715	0.999581	0.673594	0.955444	0.825734	-0.0445286	0.103795	-0.000378307	0.104173	0.0441503	0.148323
ENSG00000013364	MVP	100.653	161.793	123.107	108.84	0.981418	0.890071	0.971482	0.8117	0.926123	0.932204	-0.110703	0.563395	0.174684	0.388711	0.285387	0.674098
ENSG00000013374	NUB1	66.2664	65.9745	69.7811	74.0054	0.814066	0.783485	0.938244	0.994353	0.948873	0.935086	-0.154926	-0.161108	-0.0824979	-0.0786104	0.0724284	-0.00618204
ENSG00000013375	PGM3	83.587	32.1424	96.2792	35.5114	0.570948	0.966551	0.342595	0.47958	0.978474	0.235509	1.19006	-0.135765	1.38956	-1.52532	0.199494	-1.32583
ENSG00000013392	RWDD2A	1.81336	1.29359	1.91751	2.20461	0.944285	0.808737	0.965003	0.922381	0.987451	0.892998	-0.140909	-0.352311	-0.102035	-0.250276	0.0388742	-0.211402
ENSG00000013441	CLK1	9.11373	11.5781	12.1667	5.42303	0.171385	0.0180295	0.00458804	0.727875	0.631836	0.976923	0.582263	0.871202	0.932424	-0.0612221	0.350161	0.288939
ENSG00000013503	POLR3B	19.7511	19.92	21.4893	23.9354	0.819269	0.836777	0.93664	0.994387	0.95547	0.962061	-0.253834	-0.242675	-0.142919	-0.0997559	0.110915	0.0111594
ENSG00000013523	ANGEL1	6.06236	5.98416	4.97153	6.94164	0.905389	0.877513	0.433515	0.992564	0.730008	0.729451	-0.149337	-0.163399	-0.359064	0.195665	-0.209727	-0.0140616
ENSG00000013561	RNF14	53.4727	60.6018	53.9001	45.0136	0.737386	0.480343	0.69867	0.893317	0.993509	0.899937	0.2387	0.413126	0.249773	0.163353	0.0110729	0.174426
ENSG00000013563	DNASE1L1	19.0243	20.7224	20.4681	20.3248	0.985455	0.994103	0.99748	0.978629	0.983545	0.995976	-0.0865895	0.025468	0.00923088	0.0162371	0.0958204	0.112057
ENSG00000013573	DDX11	42.4599	37.0925	49.3605	38.3892	0.880634	0.977955	0.408543	0.8216	0.748201	0.372257	0.138535	-0.0470777	0.34669	-0.393767	0.208155	-0.185613
ENSG00000013583	HEBP1	42.3642	53.3403	43.2429	47.2451	0.706598	0.647334	0.792111	0.170489	0.978683	0.237277	-0.150584	0.16835	-0.122289	0.290639	0.0282955	0.318935
ENSG00000013588	GPRC5A	357.517	197.746	428.603	153.561	0.00176087	0.192691	0.00176087	0.00176087	0.412551	0.00176087	1.20858	0.360686	1.46888	-1.10819	0.260298	-0.847893
ENSG00000013619	MAMLD1	15.8861	17.7138	18.2777	12.649	0.555248	0.41609	0.0882043	0.917639	0.799295	0.981787	0.288037	0.428404	0.469092	-0.0406881	0.181055	0.140367
ENSG00000013810	TACC3	52.5885	51.1921	48.9392	52.453	0.997036	0.982287	0.926984	0.98152	0.931371	0.964916	0.00358552	-0.0337995	-0.0962352	0.0624357	-0.0998208	-0.0373851
ENSG00000014123	UFL1	4.98016	4.90698	5.10102	5.79479	0.613603	0.560591	0.710907	0.987097	0.979008	0.964615	-0.15925	-0.174455	-0.134484	-0.0399712	0.0247662	-0.0152051
ENSG00000014138	POLA2	43.7347	40.5772	45.1843	36.281	0.621518	0.836244	0.509344	0.919104	0.97736	0.843928	0.256661	0.153453	0.301678	-0.148226	0.0450177	-0.103208
ENSG00000014164	ZC3H3	21.7876	19.0413	20.0623	22.7583	0.927855	0.278255	0.55392	0.515922	0.776307	0.906859	-0.0577025	-0.234688	-0.166329	-0.0683594	-0.108627	-0.176986
ENSG00000014216	CAPN1	135.926	204.819	132.519	124.53	0.964856	0.675728	0.97931	0.722796	0.989314	0.745124	0.124415	0.708889	0.0883305	0.620559	-0.0360845	0.584474
ENSG00000014641	MDH1	152.833	170.622	150.556	144.025	0.901487	0.670233	0.935603	0.829073	0.983952	0.771583	0.0844976	0.241401	0.0631235	0.178277	-0.0213741	0.156903
ENSG00000014824	SLC30A9	18.6524	19.3548	19.6012	18.0122	0.970779	0.923433	0.876062	0.969634	0.943779	0.989042	0.0454297	0.0936806	0.110232	-0.0165511	0.064802	0.0482509
ENSG00000014914	MTMR11	1.6892	1.01721	1.31456	1.94592	0.969871	0.519274	0.744091	0.733628	0.902841	0.879685	-0.0970537	-0.387147	-0.251544	-0.135602	-0.154491	-0.290093
ENSG00000014919	COX15	23.3893	27.2154	26.3264	29.3676	0.544114	0.94102	0.871878	0.820229	0.86711	0.982049	-0.305055	-0.102546	-0.147128	0.0445818	0.157927	0.202508
ENSG00000015133	CCDC88C	3.632	8.17869	4.89132	6.02836	0.477412	0.878285	0.925527	0.398064	0.788129	0.748137	-0.511458	0.342375	-0.220325	0.5627	0.291133	0.853833
ENSG00000015153	YAF2	69.7835	54.2411	67.6	55.5997	0.924516	0.993317	0.925563	0.92425	0.990145	0.924304	0.317591	-0.0344365	0.273026	-0.307462	-0.044565	-0.352027
ENSG00000015171	ZMYND11	20.2734	38.0138	22.696	23.8823	0.748343	0.625333	0.963983	0.481291	0.85778	0.579533	-0.216644	0.628532	-0.0676884	0.69622	0.148956	0.845176
ENSG00000015475	BID	28.4517	33.0152	28.9168	31.7561	0.966277	0.989042	0.971876	0.961161	0.993753	0.96566	-0.148625	0.0528331	-0.126757	0.17959	0.0218682	0.201459
ENSG00000015479	MATR3	403.201	351.908	420.495	355.807	0.908937	0.992831	0.834516	0.893966	0.980359	0.813864	0.179456	-0.0158072	0.239753	-0.25556	0.0602965	-0.195263
ENSG00000015532	XYLT2	6.19809	2.26504	6.03604	3.79321	0.0189271	0.142675	0.0257461	0.00176087	0.979508	0.00176087	0.500925	-0.441804	0.472122	-0.913925	-0.0288031	-0.942729
ENSG00000015676	NUDCD3	57.6678	134.999	52.64	86.5516	0.159053	0.435021	0.0233574	0.0295439	0.91377	0.0114792	-0.569566	0.629575	-0.696561	1.32614	-0.126995	1.19914
ENSG00000016082	ISL1	1.21182	0.412112	0.969407	0.816148	0.707208	0.475616	0.933756	0.17849	0.923575	0.38625	0.189668	-0.223426	0.0764517	-0.299878	-0.113216	-0.413094
ENSG00000016391	CHDH	4.13431	6.93346	4.26486	5.59137	0.444397	0.457955	0.69097	0.0964469	0.987983	0.429181	-0.307459	0.234859	-0.277078	0.511937	0.0303812	0.542318
ENSG00000016864	GLT8D1	33.245	35.4853	29.376	29.2477	0.963983	0.929198	0.99784	0.983597	0.967415	0.936126	0.173669	0.262575	0.00591144	0.256664	-0.167757	0.0889063
ENSG00000017260	ATP2C1	121.011	95.3083	135.703	95.8173	0.521933	0.995271	0.177447	0.558424	0.839354	0.219967	0.330626	-0.00752678	0.493398	-0.500925	0.162773	-0.338153
ENSG00000017483	SLC38A5	175.683	163.45	186.594	164.578	0.891174	0.991945	0.666864	0.867142	0.899709	0.61794	0.0931078	-0.00980258	0.179086	-0.188888	0.0859781	-0.10291
ENSG00000017621	MAGIX	6.31701	3.22272	7.04562	3.56648	0.325668	0.96881	0.160972	0.281151	0.94729	0.16309	0.5793	-0.091964	0.700454	-0.792418	0.121154	-0.671264
ENSG00000017797	RALBP1	30.7351	25.5469	26.7493	27.9199	0.868559	0.893954	0.963065	0.640373	0.727057	0.963408	0.129733	-0.119215	-0.0575785	-0.0616369	-0.187312	-0.248948
ENSG00000018189	RUFY3	7.48567	11.0972	9.90235	7.83679	0.983952	0.837083	0.862318	0.808239	0.812169	0.975812	-0.0524379	0.412999	0.274987	0.138012	0.327425	0.465437
ENSG00000018236	CNTN1	1.1043	1.26695	1.9894	1.66705	0.742746	0.898492	0.963488	0.949468	0.592498	0.771003	-0.240352	-0.166676	0.121552	-0.288227	0.361904	0.0736764
ENSG00000018408	WWTR1	67.9062	53.5147	67.0524	44.9391	0.156229	0.793937	0.156442	0.629629	0.99105	0.64228	0.57463	0.24208	0.556901	-0.314822	-0.0177289	-0.332551
ENSG00000018510	AGPS	29.0091	19.1204	27.912	20.2542	0.495998	0.9802	0.603475	0.631123	0.983975	0.692136	0.478614	-0.0754405	0.426647	-0.502087	-0.0519673	-0.554054
ENSG00000018610	CXorf56	35.2337	38.8613	31.4548	34.7527	0.98957	0.852493	0.885533	0.890528	0.862893	0.613334	0.0187587	0.152885	-0.135637	0.288522	-0.154396	0.134126
ENSG00000018699	TTC27	56.8681	75.2566	54.6485	40.7913	0.207042	0.45017	0.417942	0.761143	0.976794	0.745515	0.460169	0.852341	0.40472	0.44762	-0.0554483	0.392172
ENSG00000019144	PHLDB1	15.212	26.1663	13.5233	16.9162	0.9407	0.714363	0.747925	0.66475	0.934844	0.580333	-0.136208	0.574348	-0.285187	0.859535	-0.148979	0.710555
ENSG00000019169	MARCO	1.04928	0.875327	0.632861	0.431531	0.414137	0.768284	0.842791	0.97736	0.80923	0.950257	0.326604	0.241861	0.114766	0.127095	-0.211837	-0.0847426
ENSG00000019485	PRDM11	11.9188	8.16948	9.40073	12.1836	0.987128	0.709288	0.560482	0.727093	0.620026	0.93308	-0.0271889	-0.479978	-0.315098	-0.16488	-0.287909	-0.452789
ENSG00000019549	SNAI2	9.28354	5.08036	11.1211	7.04092	0.239774	0.209299	0.00704704	0.00176087	0.526172	0.00176087	0.319678	-0.352647	0.537347	-0.889994	0.217669	-0.672325
ENSG00000019995	ZRANB1	10.249	16.1196	10.452	11.2018	0.863715	0.357874	0.921075	0.224362	0.984848	0.261331	-0.108071	0.456816	-0.0843572	0.541174	0.0237135	0.564887
ENSG00000020129	NCDN	26.9843	21.3721	26.8195	23.1849	0.735655	0.937276	0.744212	0.627259	0.993753	0.638728	0.202713	-0.107772	0.194486	-0.302258	-0.00822634	-0.310484
ENSG00000020181	GPR124	1.18563	1.34618	0.621139	1.53785	0.935227	0.977469	0.273097	0.98348	0.696694	0.687091	-0.151294	-0.0803578	-0.432679	0.352321	-0.281385	0.0709363
ENSG00000020256	ZFP64	15.998	11.1223	15.1254	14.5989	0.920884	0.423311	0.978257	0.215473	0.963306	0.288198	0.116749	-0.339067	0.04505	-0.384117	-0.0716989	-0.455816
ENSG00000020426	MNAT1	15.8426	19.6805	15.9257	21.33	0.602815	0.957671	0.602815	0.764485	0.996275	0.766688	-0.38686	-0.105788	-0.380157	0.274369	0.0067036	0.281072
ENSG00000020577	SAMD4A	9.04091	5.96741	13.0644	2.99159	0.288899	0.586353	0.0144433	0.851907	0.847194	0.422615	1.14529	0.674611	1.59357	-0.91896	0.448284	-0.470676
ENSG00000020633	RUNX3	1.74909	1.20365	2.16353	1.97985	0.964615	0.532939	0.978371	0.621226	0.90679	0.406592	-0.0861736	-0.312998	0.0650932	-0.378091	0.151267	-0.226824
ENSG00000020922	MRE11A	19.1678	12.6194	18.249	15.6633	0.44637	0.711734	0.616456	0.396681	0.941582	0.46588	0.261116	-0.272871	0.197096	-0.469967	-0.0640207	-0.533987
ENSG00000021355	SERPINB1	54.0477	52.4454	55.0808	48.0643	0.788891	0.874692	0.720751	0.9757	0.983597	0.946561	0.162873	0.121028	0.189223	-0.0681954	0.0263504	-0.041845
ENSG00000021574	SPAST	7.5736	5.472	7.40599	5.2256	0.00458804	0.946561	0.0125108	0.0332405	0.977446	0.0496622	0.405944	0.0483771	0.380462	-0.332085	-0.0254817	-0.357567
ENSG00000021645	NRXN3	1.14621	1.06248	0.910918	1.33191	0.885187	0.730883	0.44039	0.959293	0.760871	0.865135	-0.0827345	-0.121649	-0.194875	0.0732262	-0.112141	-0.0389145
ENSG00000021762	OSBPL5	47.3022	50.9537	49.6679	65.1099	0.177447	0.69153	0.302285	0.955099	0.960361	0.985622	-0.444874	-0.341794	-0.377257	0.0354632	0.0676162	0.103079
ENSG00000021776	AQR	25.4796	31.116	23.7568	20.3159	0.524478	0.250016	0.705577	0.745095	0.935086	0.566834	0.300289	0.569456	0.206881	0.362575	-0.0934076	0.269167
ENSG00000021826	CPS1	598.85	508.843	615.172	535.625	0.96516	0.983741	0.948063	0.938779	0.99087	0.915307	0.160405	-0.0737203	0.199072	-0.272793	0.0386677	-0.234125
ENSG00000022267	FHL1	0.881767	0.352108	0.541288	0.31896	0.200372	1	0.524088	0.632566	0.690552	0.826952	0.313476	0.0204764	0.132082	-0.111606	-0.181394	-0.292999
ENSG00000022277	RTFDC1	97.0497	94.9999	97.3764	105.993	0.732411	0.63125	0.747783	0.97597	0.993753	0.970527	-0.124713	-0.154883	-0.119963	-0.03492	0.00475067	-0.0301693
ENSG00000022567	SLC45A4	12.5791	24.9031	10.7497	21.2413	0.0406367	0.84688	0.00324853	0.0465167	0.809658	0.00458804	-0.672789	0.211082	-0.866227	1.07731	-0.193438	0.883871
ENSG00000022840	RNF10	531.314	630.591	524.104	557.922	0.971586	0.90246	0.959901	0.833978	0.99087	0.80493	-0.0702407	0.176047	-0.0898778	0.265925	-0.0196372	0.246288
ENSG00000022976	ZNF839	2.57568	1.93957	2.16603	3.17384	0.863517	0.707528	0.647775	0.883614	0.921628	0.9751	-0.177249	-0.393197	-0.312562	-0.0806351	-0.135313	-0.215948
ENSG00000023041	ZDHHC6	16.8092	66.1967	17.825	33.0304	0.0977992	0.154533	0.197096	0.00176087	0.97736	0.00176087	-0.897169	0.961094	-0.821287	1.78238	0.0758824	1.85826
ENSG00000023171	GRAMD1B	21.7875	15.6257	24.8666	12.4766	0.00176087	0.613453	0.00176087	0.301329	0.708256	0.0786989	0.716481	0.283958	0.892091	-0.608133	0.17561	-0.432523
ENSG00000023191	RNH1	175.53	223.834	168.742	152.933	0.514508	0.458944	0.7029	0.659714	0.936126	0.605727	0.196418	0.543618	0.140174	0.403445	-0.0562449	0.3472
ENSG00000023228	NDUFS1	40.5709	53.7859	44.2407	38.9379	0.970351	0.594056	0.800443	0.654207	0.903159	0.789215	0.0564305	0.446463	0.175726	0.270737	0.119296	0.390033
ENSG00000023287	RB1CC1	29.7126	43.3435	32.8662	30.1095	0.988988	0.545017	0.884081	0.533281	0.866533	0.674428	-0.017944	0.497896	0.118829	0.379067	0.136773	0.51584
ENSG00000023318	ERP44	17.0456	15.0449	17.829	17.1203	0.992831	0.521029	0.933862	0.55115	0.921618	0.289171	-0.00564742	-0.165765	0.0525068	-0.218272	0.0581542	-0.160118
ENSG00000023330	ALAS1	45.8545	37.8385	49.4815	24.6348	0.00176087	0.38843	0.00176087	0.743714	0.863262	0.62625	0.845342	0.580851	0.950742	-0.369891	0.105399	-0.264491
ENSG00000023445	BIRC3	3.3972	4.82036	17.1773	1.02664	0.00176087	0.00176087	0.00176087	0.648203	0.00176087	0.00176087	0.834494	1.17213	2.66361	-1.49148	1.82912	0.337637
ENSG00000023516	AKAP11	2.72744	3.11205	2.78299	2.48815	0.819044	0.251818	0.742662	0.648545	0.9812	0.730947	0.0749383	0.187781	0.0917919	0.0959892	0.0168536	0.112843
ENSG00000023572	GLRX2	81.6866	65.2454	81.7341	67.9185	0.38843	0.955465	0.385079	0.223143	0.998981	0.225183	0.259322	-0.0562387	0.260141	-0.31638	0.000818633	-0.315561
ENSG00000023608	SNAPC1	2.508	3.13491	2.80007	3.18766	0.885372	0.993887	0.961854	0.918546	0.971222	0.973154	-0.202596	-0.0147449	-0.112028	0.0972835	0.0905679	0.187851
ENSG00000023697	DERA	60.8197	47.6467	54.7484	53.0379	0.670233	0.895928	0.976026	0.676494	0.81673	0.866517	0.190792	-0.148728	0.0441543	-0.192882	-0.146637	-0.339519
ENSG00000023734	STRAP	294.791	277.958	295.353	272.46	0.80685	0.982307	0.805767	0.918006	0.996629	0.915521	0.112851	0.0286145	0.115581	-0.0869662	0.00272929	-0.0842369
ENSG00000023839	ABCC2	31.9162	30.4266	32.8542	21.8387	0.00176087	0.500526	0.00176087	0.955255	0.956849	0.903556	0.508669	0.443872	0.548027	-0.104155	0.039358	-0.0647968
ENSG00000023909	GCLM	39.7209	39.5293	42.8118	29.5202	0.446715	0.49786	0.327468	0.995956	0.952633	0.952425	0.404494	0.397853	0.507602	-0.109749	0.103108	-0.00664073
ENSG00000024048	UBR2	11.5055	12.4822	12.3223	10.43	0.773647	0.55288	0.444397	0.873021	0.8664	0.98822	0.119721	0.220454	0.204437	0.0160176	0.0847161	0.100734
ENSG00000024422	EHD2	149.823	106.902	142.918	130.102	0.712284	0.550061	0.836634	0.164017	0.956068	0.241692	0.200738	-0.278622	0.133584	-0.412206	-0.0671536	-0.47936
ENSG00000024526	DEPDC1	30.8334	30.095	23.968	28.379	0.956114	0.975669	0.855253	0.98902	0.708008	0.772508	0.11209	0.0792742	-0.226339	0.305614	-0.338429	-0.0328156
ENSG00000024862	CCDC28A	2.9355	3.3001	2.6439	4.14331	0.458682	0.698815	0.250811	0.917535	0.939541	0.750989	-0.31582	-0.212997	-0.403679	0.190683	-0.0878593	0.102823
ENSG00000025156	HSF2	4.11492	9.21721	3.66991	6.01749	0.108384	0.629131	0.0279957	0.26433	0.86826	0.15485	-0.390817	0.484491	-0.499825	0.984316	-0.109008	0.875308
ENSG00000025293	PHF20	39.1184	35.6322	35.3956	43.3014	0.930641	0.773327	0.732061	0.941885	0.924846	0.994368	-0.139772	-0.267588	-0.276687	0.0090991	-0.136916	-0.127816
ENSG00000025423	HSD17B6	6.77112	1.79389	11.0196	9.24532	0.955197	0.435021	0.978371	0.619136	0.916101	0.395078	-0.358492	-1.56757	0.21136	-1.77894	0.569852	-1.20908
ENSG00000025434	NR1H3	20.8402	32.6097	19.2781	27.0724	0.735254	0.895214	0.626855	0.546102	0.967046	0.462986	-0.348075	0.251526	-0.450281	0.701807	-0.102206	0.599601
ENSG00000025708	TYMP	37.656	37.1269	39.607	40.408	0.93402	0.937815	0.985361	0.99087	0.961924	0.95868	-0.0967973	-0.116176	-0.0275102	-0.0886655	0.0692871	-0.0193784
ENSG00000025770	NCAPH2	48.6191	51.6897	49.9706	44.7744	0.886174	0.776064	0.800135	0.948873	0.977944	0.976767	0.113963	0.198926	0.151977	0.0469496	0.0380139	0.0849635
ENSG00000025772	TOMM34	48.7741	54.0104	50.6984	44.9449	0.768983	0.210431	0.562213	0.667133	0.938817	0.852127	0.113124	0.254726	0.166791	0.0879356	0.0536664	0.141602
ENSG00000025796	SEC63	120.509	125.805	115.526	109.575	0.90208	0.80929	0.96516	0.971637	0.974144	0.922702	0.134874	0.19593	0.0749661	0.120964	-0.0599078	0.0610565
ENSG00000025800	KPNA6	21.194	30.1799	20.9572	19.3678	0.869759	0.549871	0.890528	0.64228	0.989573	0.630504	0.118313	0.590721	0.103508	0.487213	-0.014805	0.472408
ENSG00000026025	VIM	1286.78	968.277	1331.74	1027.43	0.0654979	0.869117	0.0406367	0.0134839	0.951326	0.0104001	0.32416	-0.0853772	0.373632	-0.459009	0.0494714	-0.409537
ENSG00000026103	FAS	10.9483	26.2555	13.4552	13.0175	0.839454	0.0877427	0.982624	0.0207025	0.827365	0.125205	-0.213882	0.911887	0.0414477	0.870439	0.25533	1.12577
ENSG00000026297	RNASET2	8.55668	5.9164	7.45304	7.98342	0.966077	0.61156	0.964328	0.459531	0.880418	0.739757	0.0805502	-0.33469	-0.0787558	-0.255934	-0.159306	-0.41524
ENSG00000026508	CD44	685.28	687.592	722.101	651.581	0.930045	0.918499	0.744819	0.99484	0.926984	0.928775	0.0725319	0.077377	0.147825	-0.0704479	0.075293	0.00484506
ENSG00000026950	BTN3A1	8.00366	16.0943	8.31215	15.9091	0.0125108	0.992894	0.0104001	0.0831236	0.982287	0.118782	-0.840165	0.0148425	-0.796348	0.81119	0.0438172	0.855007
ENSG00000027001	MIPEP	11.9335	21.5575	13.9417	14.3923	0.671084	0.532939	0.981957	0.255426	0.738571	0.488163	-0.234461	0.523168	-0.0402128	0.563381	0.194248	0.757629
ENSG00000027075	PRKCH	0.30595	0.126471	0.430156	0.637501	0.129571	0.337056	0.615184	1	0.691524	0.438546	-0.19381	-0.31071	-0.118123	-0.192588	0.0756877	-0.1169
ENSG00000027697	IFNGR1	9.65976	10.3042	14.8646	9.31134	0.9751	0.864898	0.0125108	0.943554	0.0508851	0.115337	0.0437682	0.121381	0.576228	-0.454847	0.53246	0.0776128
ENSG00000027847	B4GALT7	15.0918	22.4619	16.4609	18.0646	0.808058	0.711369	0.935524	0.461002	0.958812	0.602815	-0.231348	0.285884	-0.12018	0.406064	0.111169	0.517232
ENSG00000027869	SH2D2A	6.66269	5.94551	8.25953	7.32688	0.960197	0.834971	0.927634	0.950807	0.821754	0.627981	-0.106579	-0.231255	0.137498	-0.368753	0.244078	-0.124675
ENSG00000028116	VRK2	18.2743	16.5444	18.4955	16.1846	0.815889	0.984967	0.769287	0.873795	0.989314	0.831356	0.156935	0.0282664	0.17259	-0.144324	0.0156551	-0.128669
ENSG00000028203	VEZT	29.3289	48.0029	33.2146	39.2914	0.315582	0.718256	0.725036	0.093825	0.8269	0.312473	-0.398347	0.27617	-0.229668	0.505838	0.16868	0.674518
ENSG00000028310	BRD9	53.1852	65.3496	45.2285	55.1168	0.980062	0.712612	0.63969	0.748983	0.833089	0.271395	-0.0496337	0.237754	-0.274257	0.512012	-0.224624	0.287388
ENSG00000028528	SNX1	80.5928	81.5114	74.3907	86.939	0.956108	0.961123	0.846147	0.992317	0.951702	0.928966	-0.1068	-0.090843	-0.219419	0.128576	-0.112619	0.0159571
ENSG00000028839	TBPL1	12.7937	11.016	13.6355	16.2942	0.712437	0.700387	0.794697	0.9285	0.963859	0.842847	-0.306403	-0.4911	-0.226561	-0.264539	0.0798424	-0.184697
ENSG00000029153	ARNTL2	2.71431	2.609	3.08586	2.93774	0.951457	0.931531	0.975707	0.982287	0.876696	0.861208	-0.0668042	-0.0993971	0.0426409	-0.142038	0.109445	-0.0325929
ENSG00000029363	BCLAF1	131.419	152.693	131.534	130.929	0.995956	0.82338	0.994943	0.834516	0.998981	0.832485	0.00530825	0.218752	0.00655124	0.212201	0.00124299	0.213444
ENSG00000029364	SLC39A9	16.2623	12.1379	18.1011	13.7017	0.765569	0.892998	0.58494	0.501016	0.914266	0.349381	0.217948	-0.151353	0.356354	-0.507707	0.138406	-0.369301
ENSG00000029534	ANK1	0.352795	0.244284	0.271295	0.116214	0.117521	1	1	0.843909	0.918536	1	0.15289	0.0847697	0.10203	-0.0172598	-0.0508605	-0.0681204
ENSG00000029639	TFB1M	11.2587	19.5003	13.6492	12.8434	0.941199	0.813485	0.981477	0.705778	0.884449	0.849951	-0.162882	0.534535	0.0762673	0.458268	0.23915	0.697417
ENSG00000029725	RABEP1	49.8368	75.7594	52.4931	47.0646	0.982999	0.671656	0.966873	0.743577	0.985177	0.807167	0.0792942	0.664335	0.151391	0.512944	0.0720969	0.58504
ENSG00000029993	HMGB3	95.624	82.2129	94.625	94.4779	0.988666	0.786719	0.997571	0.758846	0.990145	0.781159	0.0170374	-0.196157	0.002198	-0.198355	-0.0148394	-0.213195
ENSG00000030066	NUP160	44.4089	53.0455	46.2971	44.5176	0.995616	0.250016	0.939858	0.239774	0.93159	0.48862	-0.00337516	0.242848	0.0541599	0.188688	0.0575351	0.246223
ENSG00000030110	BAK1	17.8259	32.8974	16.9703	27.2173	0.00818108	0.392648	0.00176087	0.00176087	0.94893	0.00176087	-0.559437	0.256297	-0.62308	0.879377	-0.0636439	0.815733
ENSG00000030582	GRN	130.465	126.275	133.554	135.849	0.970797	0.934563	0.987652	0.978474	0.983545	0.957241	-0.0574776	-0.103849	-0.0242211	-0.0796277	0.0332565	-0.0463712
ENSG00000031003	FAM13B	10.2025	9.89569	9.79776	7.32319	0.428939	0.598649	0.472068	0.985256	0.978096	0.993494	0.388281	0.351543	0.339617	0.011926	-0.0486638	-0.0367378
ENSG00000031691	CENPQ	6.03052	4.58423	5.7274	4.70898	0.52227	0.984346	0.675793	0.457137	0.965786	0.612792	0.2594	-0.0270787	0.20389	-0.230968	-0.0555103	-0.286479
ENSG00000031698	SARS	168.791	165.8	171.936	163.724	0.958812	0.984487	0.909181	0.978474	0.978383	0.946377	0.0434494	0.0179602	0.069774	-0.0518138	0.0263246	-0.0254892
ENSG00000031823	RANBP3	227.673	232.668	227.501	219.421	0.970667	0.959442	0.971451	0.986035	0.998981	0.985622	0.0527892	0.0838291	0.0517084	0.0321207	-0.00108083	0.0310399
ENSG00000032219	ARID4A	3.71884	1.6319	2.51081	2.36543	0.639297	0.642602	0.981782	0.177795	0.765358	0.630083	0.389599	-0.265399	0.0472628	-0.312662	-0.342336	-0.654998
ENSG00000032389	TSSC1	22.1626	32.531	27.1215	21.4544	0.976834	0.210701	0.472588	0.257057	0.494361	0.727875	0.0429171	0.558034	0.312226	0.245807	0.269309	0.515116
ENSG00000032444	PNPLA6	99.8596	104.859	111.869	109.32	0.926253	0.9751	0.985383	0.970335	0.886589	0.952172	-0.128131	-0.0590044	0.0326622	-0.0916666	0.160793	0.0691265
ENSG00000032742	IFT88	3.82682	2.8894	5.20289	4.29355	0.941683	0.670045	0.855015	0.796733	0.64746	0.417942	-0.111165	-0.364217	0.194702	-0.558918	0.305867	-0.253051
ENSG00000033011	ALG1	64.5101	74.5887	67.1373	77.5982	0.751468	0.978383	0.826514	0.833751	0.978421	0.906681	-0.259162	-0.0556043	-0.203272	0.147667	0.0558908	0.203558
ENSG00000033030	ZCCHC8	4.6062	6.71436	4.66093	5.26829	0.765447	0.448172	0.792372	0.11613	0.990414	0.126536	-0.137795	0.261779	-0.125892	0.387671	0.011903	0.399574
ENSG00000033050	ABCF2	143.735	201.554	150.975	114.405	0.481735	0.0340204	0.27667	0.288367	0.947111	0.383871	0.324194	0.806259	0.394143	0.412116	0.0699485	0.482064
ENSG00000033100	CHPF2	14.0874	11.4562	14.4348	8.59506	0.00176087	0.0891068	0.00176087	0.281889	0.975508	0.201689	0.602539	0.344879	0.633362	-0.288483	0.0308227	-0.25766
ENSG00000033170	FUT8	4.10383	4.42657	4.11787	4.04466	0.992831	0.966077	0.992159	0.969871	0.997406	0.972289	0.0140536	0.0883878	0.0173683	0.0710195	0.00331467	0.0743342
ENSG00000033178	UBA6	13.5433	12.6653	16.1304	15.733	0.956405	0.934563	0.992487	0.984381	0.9495	0.924846	-0.190144	-0.27403	0.0319741	-0.306004	0.222118	-0.0838863
ENSG00000033327	GAB2	5.11922	4.22215	5.32948	4.65367	0.937815	0.935603	0.886631	0.801188	0.981418	0.738104	0.0975689	-0.0967371	0.139561	-0.236298	0.0419917	-0.194306
ENSG00000033627	ATP6V0A1	66.7697	63.2713	81.1599	58.2798	0.809403	0.926895	0.215977	0.966056	0.65906	0.530667	0.190098	0.114774	0.464213	-0.349439	0.274115	-0.0753243
ENSG00000033800	PIAS1	17.7274	15.5492	17.2827	14.3563	0.769816	0.955636	0.836306	0.890697	0.98816	0.936087	0.270354	0.101559	0.237461	-0.135902	-0.0328938	-0.168796
ENSG00000033867	SLC4A7	4.2607	2.0174	4.33871	2.23361	0.0544748	0.934981	0.02647	0.0257461	0.990145	0.0154383	0.564436	-0.0756263	0.582301	-0.657927	0.0178653	-0.640062
ENSG00000034063	UHRF1	15.2689	14.9246	14.6429	13.5354	0.661834	0.843655	0.838059	0.980359	0.944762	0.983597	0.152617	0.123562	0.0993475	0.0242149	-0.0532693	-0.0290545
ENSG00000034152	MAP2K3	109.85	118.99	141.813	88.2822	0.416148	0.305204	0.00324853	0.918595	0.292832	0.69153	0.309052	0.422374	0.671681	-0.249306	0.362629	0.113323
ENSG00000034510	TMSB10	4035.34	3220.76	3993.04	3737.82	0.764552	0.354056	0.814606	0.0622683	0.985775	0.0786989	0.110436	-0.214672	0.0952411	-0.309913	-0.0151951	-0.325108
ENSG00000034533	ASTE1	6.4845	6.00017	6.11188	6.60415	0.99382	0.976875	0.982307	0.982287	0.987652	0.994029	-0.020203	-0.105002	-0.0849964	-0.0200057	-0.0647933	-0.084799
ENSG00000034677	RNF19A	92.7436	98.8956	87.9638	69.0615	0.905546	0.817935	0.937815	0.984967	0.989056	0.975705	0.41496	0.505723	0.340276	0.165447	-0.0746839	0.0907629
ENSG00000034693	PEX3	21.1749	15.7852	15.7742	15.2823	0.888649	0.992317	0.991044	0.912472	0.870082	0.999581	0.423268	0.041382	0.0404894	0.000892571	-0.382778	-0.381886
ENSG00000034713	GABARAPL2	60.081	83.5733	65.2466	61.4625	0.981418	0.139018	0.931716	0.0796852	0.871162	0.300426	-0.0317526	0.431256	0.083557	0.347699	0.11531	0.463009
ENSG00000035115	SH3YL1	1.53884	0.455812	1.496	1.11653	0.887216	0.282826	0.883282	0.11332	0.992469	0.0538799	0.183336	-0.34374	0.165765	-0.509505	-0.0175714	-0.527076
ENSG00000035141	FAM136A	62.2135	60.1672	58.7043	60.1634	0.95388	0.999832	0.970779	0.95547	0.88418	0.971394	0.0468112	8.81881e-05	-0.0342667	0.0343549	-0.0810779	-0.046723
ENSG00000035403	VCL	128.58	113.94	129.15	118.664	0.905067	0.966645	0.897655	0.791291	0.995127	0.777016	0.113939	-0.0576169	0.120222	-0.177839	0.00628386	-0.171556
ENSG00000035499	DEPDC1B	5.89716	5.22414	5.37522	5.31933	0.930964	0.990145	0.992831	0.908678	0.941185	0.984967	0.109622	-0.0188857	0.0109745	-0.0298602	-0.0986478	-0.128508
ENSG00000035664	DAPK2	3.21443	5.65775	4.37166	3.06345	0.98816	0.527414	0.760871	0.671867	0.852517	0.873006	0.0423889	0.5968	0.331549	0.265251	0.28916	0.554411
ENSG00000035681	NSMAF	29.8312	40.7211	32.3863	33.6433	0.867442	0.73755	0.98007	0.392228	0.94102	0.691908	-0.163189	0.261318	-0.051797	0.313115	0.111392	0.424507
ENSG00000035687	ADSS	31.3476	33.4291	29.2877	34.4616	0.723245	0.961854	0.355275	0.851907	0.833875	0.506383	-0.128795	-0.0414431	-0.220782	0.179339	-0.0919873	0.0873519
ENSG00000035862	TIMP2	86.9083	85.324	86.7499	82.6761	0.886498	0.949976	0.893928	0.976767	0.996071	0.978474	0.0703633	0.0444234	0.0677907	-0.0233673	-0.00257261	-0.0259399
ENSG00000035928	RFC1	67.5934	69.8804	74.6223	63.0997	0.960323	0.936404	0.849031	0.982362	0.933515	0.969892	0.0962996	0.142948	0.235113	-0.0921659	0.138814	0.0466479
ENSG00000036054	TBC1D23	11.5797	14.3591	13.2658	13.353	0.87827	0.966077	0.995156	0.791849	0.888591	0.964095	-0.177069	0.0915728	-0.00821739	0.0997902	0.168852	0.268642
ENSG00000036257	CUL3	67.613	89.6529	54.9723	55.5401	0.72022	0.626435	0.991974	0.803901	0.661422	0.614644	0.274789	0.671613	-0.0143071	0.68592	-0.289096	0.396824
ENSG00000036549	ZZZ3	50.7937	49.1524	52.3547	39.9804	0.588167	0.750668	0.486153	0.98348	0.982049	0.96516	0.33065	0.285086	0.372689	-0.0876029	0.042039	-0.0455638
ENSG00000036672	USP2	3.41932	2.02161	2.95807	3.00562	0.952172	0.739772	0.993776	0.390871	0.923274	0.654243	0.114563	-0.315776	-0.0137701	-0.302005	-0.128333	-0.430339
ENSG00000037042	TUBG2	1.73748	1.71008	1.81667	2.52736	0.488364	0.46798	0.550306	0.992469	0.981782	0.976794	-0.276604	-0.28722	-0.246356	-0.0408642	0.0302486	-0.0106156
ENSG00000037241	RPL26L1	199.989	79.7627	205.084	88.2075	0.00176087	0.858944	0.00704704	0.00176087	0.985853	0.00176087	1.16296	-0.141805	1.1989	-1.3407	0.0359394	-1.30476
ENSG00000037474	NSUN2	227.683	287.273	228.2	219.854	0.945147	0.523335	0.93308	0.590551	0.995577	0.592498	0.0500335	0.382821	0.0532773	0.329544	0.00324375	0.332788
ENSG00000037637	FBXO42	4.81399	6.16655	4.63445	5.89449	0.798765	0.979965	0.732377	0.721905	0.982897	0.649154	-0.212346	0.0488807	-0.250869	0.29975	-0.038523	0.261227
ENSG00000037749	MFAP3	18.399	18.4224	14.8901	20.3381	0.966077	0.972863	0.792111	0.999463	0.877665	0.903656	-0.131008	-0.129354	-0.403329	0.273975	-0.272321	0.00165399
ENSG00000037757	MRI1	43.7267	38.2924	41.968	34.0815	0.550306	0.893954	0.621506	0.874447	0.97629	0.926678	0.341777	0.159248	0.285195	-0.125946	-0.0565829	-0.182529
ENSG00000037897	METTL1	60.2315	71.9928	63.6198	67.386	0.921618	0.97368	0.975696	0.87944	0.977573	0.943561	-0.157	0.0927403	-0.0805134	0.173254	0.0764862	0.24974
ENSG00000038002	AGA	6.01334	8.39071	5.13142	8.07715	0.821667	0.990414	0.696179	0.798286	0.926443	0.674543	-0.330612	0.0442066	-0.498826	0.543033	-0.168214	0.374819
ENSG00000038210	PI4K2B	6.1357	10.6992	6.99002	8.64865	0.387918	0.796424	0.758085	0.158073	0.863262	0.3828	-0.388332	0.254067	-0.244274	0.498341	0.144058	0.642399
ENSG00000038219	BOD1L1	10.5021	8.9473	10.4742	10.1484	0.975707	0.797168	0.976502	0.697502	0.996456	0.680657	0.0414041	-0.150191	0.038181	-0.188372	-0.00322315	-0.191595
ENSG00000038274	MAT2B	37.4627	53.5122	38.056	43.3216	0.566834	0.301329	0.646283	0.0104001	0.983975	0.0241497	-0.199709	0.292606	-0.17818	0.470787	0.0215287	0.492315
ENSG00000038295	TLL1	4.51459	2.81498	4.3243	4.16866	0.977464	0.722796	0.988988	0.640543	0.987513	0.711664	0.0787173	-0.357427	0.0359487	-0.393376	-0.0427686	-0.436145
ENSG00000038358	EDC4	56.1998	49.121	50.2306	44.6002	0.657791	0.93313	0.904914	0.855253	0.897027	0.987652	0.320678	0.13358	0.164559	-0.0309792	-0.156119	-0.187098
ENSG00000038382	TRIO	57.541	35.9098	62.7463	40.0401	0.778115	0.966942	0.735254	0.674212	0.978371	0.624849	0.502117	-0.149195	0.623032	-0.772227	0.120914	-0.651313
ENSG00000038532	CLEC16A	25.5694	31.2523	27.5089	21.6815	0.636246	0.381889	0.329155	0.725264	0.911233	0.85633	0.219307	0.489694	0.31739	0.172304	0.0980823	0.270386
ENSG00000039068	CDH1	0.518296	0.411485	2.23636	0.659913	0.923874	0.880797	0.646486	0.953346	0.574527	0.639388	-0.0789312	-0.141457	0.671446	-0.812903	0.750377	-0.062526
ENSG00000039123	SKIV2L2	119.885	144.929	132.492	111.638	0.935688	0.675289	0.697599	0.793033	0.881831	0.942146	0.101075	0.370674	0.243075	0.127599	0.142	0.269599
ENSG00000039139	DNAH5	1.03419	0.666611	1.07299	1.07929	0.984109	0.50722	0.996629	0.580333	0.986565	0.512937	-0.0212863	-0.20759	-0.00295467	-0.204636	0.0183316	-0.186304
ENSG00000039319	ZFYVE16	22.752	21.7813	22.3201	14.9224	0.683226	0.692141	0.670233	0.987097	0.992982	0.991276	0.548611	0.490893	0.523215	-0.0323216	-0.0253959	-0.0577175
ENSG00000039523	FAM65A	99.977	91.8139	99.443	96.5251	0.984153	0.980359	0.987451	0.961591	0.996629	0.966863	0.0496806	-0.0706896	0.0421061	-0.112796	-0.00757449	-0.12037
ENSG00000039560	RAI14	21.5321	16.7143	23.0996	24.1376	0.966077	0.833854	0.988034	0.905833	0.981129	0.869228	-0.151497	-0.481986	-0.0584623	-0.423523	0.0930343	-0.330489
ENSG00000039650	PNKP	17.8671	19.8351	18.6047	20.6761	0.629629	0.954462	0.777016	0.78287	0.961123	0.90558	-0.190791	-0.0545234	-0.138199	0.0836757	0.0525922	0.136268
ENSG00000040199	PHLPP2	2.1842	3.05028	2.60192	2.98511	0.524951	0.98902	0.890439	0.463617	0.814935	0.863456	-0.252674	0.018738	-0.115389	0.134127	0.137284	0.271412
ENSG00000040275	SPDL1	35.0379	25.0347	33.8085	26.0899	0.753764	0.986677	0.83402	0.693884	0.987097	0.788078	0.398951	-0.0552391	0.350251	-0.40549	-0.0487002	-0.45419
ENSG00000040341	STAU2	34.2074	43.2784	38.8152	38.2173	0.910137	0.885187	0.990414	0.709357	0.900585	0.921325	-0.151532	0.171007	0.0212903	0.149716	0.172822	0.322538
ENSG00000040487	PQLC2	8.27249	11.1573	7.53257	10.8377	0.396865	0.980359	0.140043	0.391294	0.911261	0.159053	-0.321601	0.0354767	-0.42945	0.464926	-0.107849	0.357078
ENSG00000040531	CTNS	11.4802	17.0207	10.4011	22.478	0.00931705	0.476695	0.00176087	0.251818	0.915119	0.0346294	-0.860644	-0.363915	-0.981018	0.617102	-0.120374	0.496728
ENSG00000040608	RTN4R	8.70691	12.4818	6.52015	11.1582	0.322503	0.795754	0.00458804	0.0551388	0.265939	0.00176087	-0.29742	0.138279	-0.627011	0.76529	-0.329591	0.435699
ENSG00000040633	PHF23	61.508	32.4373	48.5458	51.8418	0.638797	0.02647	0.929421	0.00176087	0.403551	0.0661081	0.238212	-0.644755	-0.0911354	-0.553619	-0.329347	-0.882966
ENSG00000040731	CDH10	16.6491	6.77076	18.0873	6.0588	0.00176087	0.831056	0.00176087	0.00176087	0.874854	0.00176087	1.21047	0.122137	1.31765	-1.19551	0.107178	-1.08833
ENSG00000040933	INPP4A	4.95671	5.4488	5.53807	4.56739	0.968329	0.79877	0.871832	0.929815	0.950807	0.990145	0.083085	0.181688	0.198875	-0.0171872	0.11579	0.0986028
ENSG00000041353	RAB27B	9.3076	8.76908	9.49808	8.06352	0.935688	0.973178	0.927201	0.978474	0.991807	0.974036	0.168158	0.09776	0.192258	-0.094498	0.0241002	-0.0703977
ENSG00000041357	PSMA4	275.574	290.398	289.249	265.189	0.946561	0.776069	0.768362	0.915119	0.915279	0.993814	0.0550118	0.130073	0.124392	0.00568035	0.0693807	0.075061
ENSG00000041802	LSG1	38.02	40.3789	39.7508	43.2716	0.671165	0.856947	0.831356	0.898219	0.950891	0.983545	-0.177885	-0.0952602	-0.116802	0.0215423	0.0610827	0.082625
ENSG00000041880	PARP3	5.44628	5.76335	4.31472	8.04223	0.788864	0.887152	0.406023	0.987314	0.87096	0.85564	-0.431488	-0.371328	-0.669289	0.297961	-0.237801	0.0601595
ENSG00000041988	THAP3	17.2121	11.333	13.5872	16.4796	0.992159	0.857599	0.966709	0.87842	0.967415	0.963983	0.0560817	-0.470932	-0.245572	-0.22536	-0.301653	-0.527014
ENSG00000042088	TDP1	19.1985	21.9435	19.2141	17.4664	0.891174	0.671165	0.886645	0.852803	0.99905	0.854011	0.122976	0.298648	0.124037	0.174611	0.00106129	0.175672
ENSG00000042286	AIFM2	18.4107	8.25807	17.1604	10.2119	0.00176087	0.532784	0.00324853	0.00176087	0.920989	0.00176087	0.741038	-0.251528	0.64984	-0.901368	-0.091198	-0.992566
ENSG00000042317	SPATA7	0.528343	1.04818	0.734155	1.70493	0.0114792	0.677293	0.15485	0.496552	0.790308	0.83078	-0.551254	-0.281498	-0.438351	0.156853	0.112903	0.269756
ENSG00000042429	MED17	63.1316	73.249	77.151	63.7562	0.993122	0.904275	0.795108	0.89306	0.770756	0.978383	-0.0137693	0.194545	0.267481	-0.0729352	0.28125	0.208315
ENSG00000042445	RETSAT	30.8683	50.1217	32.3496	38.3587	0.402157	0.209299	0.542392	0.00458804	0.958027	0.00818108	-0.296183	0.369004	-0.232586	0.601591	0.0635965	0.665187
ENSG00000042493	CAPG	243.849	275.336	251.395	254.098	0.95547	0.89661	0.989042	0.799107	0.969858	0.86602	-0.0589235	0.114939	-0.0153079	0.130247	0.0436156	0.173862
ENSG00000042753	AP2S1	494.918	550.305	492.358	550.903	0.860999	0.998692	0.843359	0.871577	0.994891	0.85198	-0.154019	-0.00156121	-0.16147	0.159909	-0.00745162	0.152457
ENSG00000043093	DCUN1D1	44.4532	33.7453	43.2056	46.3836	0.977986	0.564926	0.9495	0.679379	0.983975	0.690996	-0.0587401	-0.436765	-0.0980166	-0.338748	-0.0392765	-0.378024
ENSG00000043143	PHF15	38.9953	26.8599	35.0036	23.7823	0.111548	0.896801	0.29739	0.247271	0.892909	0.540039	0.669078	0.162685	0.521285	-0.358599	-0.147793	-0.506392
ENSG00000043355	ZIC2	24.3379	10.6799	13.7855	21.0978	0.939586	0.277375	0.699639	0.111548	0.521115	0.883282	0.189385	-0.865212	-0.549155	-0.316057	-0.73854	-1.0546
ENSG00000043514	TRIT1	23.9175	41.5535	24.0724	27.8879	0.79937	0.694378	0.867226	0.573065	0.99484	0.589008	-0.205635	0.543227	-0.197038	0.740265	0.00859683	0.748862
ENSG00000044090	CUL7	7.2598	10.222	8.1452	10.0198	0.304692	0.986275	0.675788	0.242445	0.887738	0.611038	-0.37636	0.0240675	-0.244616	0.268683	0.131744	0.400427
ENSG00000044115	CTNNA1	833.087	712.536	856.75	713.5	0.72022	0.998291	0.674538	0.723178	0.980844	0.672575	0.222975	-0.00194507	0.263286	-0.265231	0.0403117	-0.22492
ENSG00000044446	PHKA2	22.425	21.1786	23.8378	24.4733	0.946502	0.87428	0.987371	0.973016	0.971222	0.920434	-0.116179	-0.191745	-0.0350548	-0.15669	0.0811247	-0.0755651
ENSG00000044459	CNTLN	3.42419	2.37623	3.48194	3.35518	0.987652	0.405724	0.978474	0.316378	0.98902	0.278565	0.0184726	-0.291247	0.0337515	-0.324998	0.0152788	-0.309719
ENSG00000044574	HSPA5	308.448	343.084	312.968	321.41	0.909261	0.793033	0.957241	0.540289	0.979008	0.633257	-0.0590127	0.0935833	-0.038159	0.131742	0.0208536	0.152596
ENSG00000046604	DSG2	33.9074	29.3893	34.3474	23.9172	0.00176087	0.0839949	0.00176087	0.365667	0.982307	0.285906	0.470371	0.276363	0.487942	-0.211579	0.017571	-0.194008
ENSG00000046647	GEMIN8	10.8649	11.4101	13.57	13.584	0.57834	0.814222	0.998981	0.976767	0.609275	0.826257	-0.276625	-0.216746	-0.00129664	-0.215449	0.275329	0.0598798
ENSG00000046651	OFD1	15.8118	18.0037	18.3424	15.1254	0.97736	0.719096	0.764714	0.85198	0.87122	0.9882	0.0566956	0.224129	0.248352	-0.024223	0.191657	0.167434
ENSG00000046653	GPM6B	2.03703	1.43447	1.6974	2.11966	0.987983	0.723702	0.924516	0.759396	0.940707	0.956375	-0.029231	-0.262438	-0.156014	-0.106424	-0.126783	-0.233207
ENSG00000047056	WDR37	4.64369	10.1553	4.49458	6.38976	0.382027	0.470173	0.239774	0.109235	0.982379	0.0801609	-0.336645	0.534884	-0.369393	0.904277	-0.0327485	0.871529
ENSG00000047188	YTHDC2	11.3379	10.4297	11.6633	7.88364	0.454641	0.627868	0.345433	0.959314	0.98707	0.927644	0.432417	0.330677	0.467192	-0.136514	0.0347744	-0.10174
ENSG00000047230	CTPS2	21.7253	33.9857	25.1877	28.0645	0.0644441	0.629131	0.829675	0.14302	0.738104	0.55221	-0.341635	0.259363	-0.145107	0.40447	0.196528	0.600997
ENSG00000047249	ATP6V1H	138.326	151.027	136.172	135.216	0.983952	0.893564	0.993289	0.92807	0.988666	0.911233	0.0323336	0.157338	0.0100166	0.147321	-0.0223171	0.125004
ENSG00000047315	POLR2B	81.6335	62.0279	72.9483	82.2203	0.994992	0.658125	0.922069	0.672853	0.931716	0.870656	-0.0100871	-0.395467	-0.168272	-0.227195	-0.158185	-0.38538
ENSG00000047346	FAM214A	3.59717	6.08363	2.58031	4.59226	0.924807	0.820386	0.505943	0.649767	0.849719	0.073984	-0.236076	0.29423	-0.525328	0.819558	-0.289252	0.530306
ENSG00000047365	ARAP2	2.11366	0.986314	3.16415	1.57216	0.873967	0.352967	0.605627	0.567814	0.91167	0.299384	0.203626	-0.258431	0.531734	-0.790165	0.328108	-0.462057
ENSG00000047410	TPR	42.8439	73.67	44.4406	41.4701	0.985622	0.644476	0.965413	0.670715	0.982645	0.68991	0.0448883	0.799698	0.0953632	0.704335	0.0504749	0.75481
ENSG00000047578	KIAA0556	5.7195	5.58412	4.32171	4.91783	0.935603	0.945774	0.938057	0.991807	0.796021	0.803086	0.158188	0.132662	-0.130005	0.262667	-0.288193	-0.0255256
ENSG00000047579	DTNBP1	31.4714	38.817	34.3642	36.8108	0.753435	0.973848	0.946731	0.744819	0.91442	0.904655	-0.213529	0.072712	-0.0939393	0.166651	0.11959	0.286241
ENSG00000047597	XK	1.17971	1.01698	0.959993	1.56997	0.790238	0.76735	0.575818	0.965786	0.921672	0.988372	-0.167017	-0.242807	-0.270318	0.0275114	-0.103301	-0.0757901
ENSG00000047617	ANO2	15.2422	11.2101	15.111	12.2494	0.731242	0.962687	0.75136	0.707185	0.994008	0.727093	0.275043	-0.10926	0.264023	-0.373283	-0.0110198	-0.384302
ENSG00000047621	C12orf4	11.0412	8.34228	11.2824	7.15549	0.225183	0.812239	0.144372	0.577238	0.988943	0.472669	0.510368	0.175845	0.536807	-0.360962	0.0264392	-0.334522
ENSG00000047634	SCML1	3.60633	4.84016	3.32008	4.45933	0.585757	0.933014	0.387003	0.440062	0.928948	0.277244	-0.204328	0.0826455	-0.279937	0.362582	-0.0756087	0.286973
ENSG00000047662	FAM184B	0.111692	0.514182	0.0949706	0.229965	1	0.0599193	1	0.00176087	1	0.00324853	-0.0786216	0.173068	-0.0900911	0.263159	-0.0114694	0.25169
ENSG00000047849	MAP4	79.7847	93.7619	86.5954	76.559	0.941092	0.545017	0.657029	0.644514	0.818023	0.899228	0.0580544	0.285675	0.173455	0.11222	0.115401	0.227621
ENSG00000047932	GOPC	8.53545	10.5409	9.19141	8.08611	0.938276	0.20103	0.706505	0.381446	0.880605	0.676255	0.0628821	0.314271	0.150022	0.164249	0.0871399	0.251389
ENSG00000048028	USP28	18.9018	27.6816	18.3196	19.8553	0.974686	0.355013	0.938545	0.20103	0.980741	0.0811719	-0.064356	0.441586	-0.105111	0.546697	-0.0407552	0.505942
ENSG00000048052	HDAC9	0.132325	0.292175	0.257026	0.61487	0.00176087	0.278255	0.157045	1	1	1	-0.294312	-0.190022	-0.212316	0.0222942	0.0819957	0.10429
ENSG00000048140	TSPAN17	26.7012	49.6662	29.1518	37.6692	0.10385	0.398795	0.285061	0.00458804	0.896801	0.0332405	-0.466908	0.381201	-0.348704	0.729905	0.118204	0.84811
ENSG00000048162	NOP16	109.067	160.012	121.419	115.824	0.958929	0.691074	0.976767	0.629629	0.920669	0.807167	-0.0852032	0.459467	0.0669311	0.392536	0.152134	0.54467
ENSG00000048342	CC2D2A	5.75381	4.36437	5.56219	3.44356	0.554493	0.83749	0.67094	0.785311	0.99026	0.85741	0.510355	0.225467	0.474254	-0.248786	-0.0361013	-0.284888
ENSG00000048392	RRM2B	65.5579	54.7066	37.6644	65.3221	0.999382	0.95547	0.708648	0.961635	0.783904	0.701902	0.0050443	-0.247564	-0.763235	0.515672	-0.76828	-0.252608
ENSG00000048405	ZNF800	5.62376	6.65536	6.15448	6.33145	0.879685	0.973657	0.982624	0.771688	0.90828	0.939239	-0.128065	0.0550262	-0.0309747	0.0860009	0.0970902	0.183091
ENSG00000048471	SNX29	6.16269	3.5031	5.07487	3.67139	0.442598	0.985866	0.713952	0.487905	0.879603	0.712612	0.525342	-0.0434578	0.319001	-0.362459	-0.206341	-0.5688
ENSG00000048544	MRPS10	39.2867	31.5883	37.878	33.1728	0.312838	0.916526	0.522017	0.112511	0.946561	0.257421	0.231217	-0.0665014	0.181133	-0.247634	-0.0500841	-0.297718
ENSG00000048649	RSF1	38.7551	47.8862	37.5965	47.515	0.82312	0.995198	0.79194	0.782847	0.986677	0.748201	-0.280885	0.0107751	-0.322493	0.333268	-0.0416077	0.29166
ENSG00000048707	VPS13D	9.94202	12.6076	10.5907	9.08468	0.976274	0.869014	0.946377	0.927855	0.982307	0.95632	0.10748	0.398152	0.183791	0.214361	0.0763116	0.290672
ENSG00000048828	FAM120A	97.3036	27.2546	97.3829	28.0152	0.00176087	0.976138	0.00176087	0.00176087	0.998212	0.00176087	1.72615	-0.0370298	1.7273	-1.76433	0.00115162	-1.76318
ENSG00000048991	R3HDM1	42.1372	39.0987	48.9105	31.7943	0.669612	0.799107	0.317574	0.959939	0.837389	0.670076	0.385215	0.282313	0.591183	-0.30887	0.205968	-0.102902
ENSG00000049089	COL9A2	1.435	2.34344	1.40142	1.64362	0.950807	0.766236	0.938252	0.652589	0.992501	0.639823	-0.0850624	0.253466	-0.0992353	0.352701	-0.0141729	0.338528
ENSG00000049130	KITLG	31.9502	29.2657	28.3962	32.0277	0.996071	0.824193	0.702163	0.82437	0.698378	0.972587	-0.00328957	-0.122129	-0.162819	0.0406898	-0.159529	-0.118839
ENSG00000049167	ERCC8	6.4849	12.5079	7.18382	8.55245	0.63906	0.662589	0.821276	0.348919	0.938433	0.465036	-0.314608	0.459261	-0.200412	0.659672	0.114197	0.773869
ENSG00000049192	ADAMTS6	0.372813	0.314647	0.357538	0.49111	0.899631	0.788911	0.834599	0.962439	0.988513	0.968736	-0.0701903	-0.105997	-0.0795077	-0.0264888	-0.00931738	-0.0358062
ENSG00000049239	H6PD	1.13371	1.06623	1.14455	0.885149	0.638797	0.739185	0.557194	0.968512	0.993494	0.955875	0.119226	0.0878201	0.124208	-0.0363877	0.0049819	-0.0314058
ENSG00000049245	VAMP3	61.3825	48.5438	69.1417	45.5458	0.714589	0.978474	0.638728	0.864227	0.946561	0.79828	0.414767	0.0882162	0.581378	-0.493161	0.166611	-0.32655
ENSG00000049246	PER3	1.12223	1.10368	1.18506	1.22544	0.972338	0.966312	0.988666	0.99319	0.982307	0.977944	-0.0469192	-0.0555162	-0.0181754	-0.0373407	0.0287437	-0.008597
ENSG00000049249	TNFRSF9	0.0136311	0.123701	0.392408	0.0119025	1	1	0.708008	1	0.637662	0.704275	0.00123901	0.0780203	0.249903	-0.171883	0.248664	0.0767813
ENSG00000049449	RCN1	451.612	563.929	458.219	559.985	0.398725	0.992831	0.457664	0.348482	0.987128	0.419583	-0.309073	0.0100894	-0.288211	0.298301	0.0208617	0.319162
ENSG00000049541	RFC2	69.5198	80.2071	72.2555	75.4258	0.842493	0.940793	0.958707	0.720263	0.961924	0.874623	-0.114472	0.0864486	-0.0603165	0.146765	0.0541552	0.20092
ENSG00000049618	ARID1B	6.61094	6.90456	6.95772	8.01365	0.416919	0.605778	0.634777	0.943554	0.926652	0.990829	-0.217725	-0.169352	-0.160764	-0.00858725	0.0569608	0.0483736
ENSG00000049656	CLPTM1L	1510.94	511.603	1574.99	402.63	0.00176087	0.467759	0.00176087	0.00176087	0.966709	0.00176087	1.90268	0.34405	1.9625	-1.61845	0.0598187	-1.55863
ENSG00000049759	NEDD4L	67.0823	63.4971	93.0967	42.299	0.393039	0.468508	0.0346294	0.976274	0.491026	0.336751	0.641042	0.564157	1.10212	-0.537964	0.461079	-0.0768851
ENSG00000049768	FOXP3	0.0799775	0.168744	0.204235	0.342042	0.447556	0.824193	0.910051	1	1	1	-0.171199	-0.110907	-0.0874889	-0.0234183	0.0837101	0.0602918
ENSG00000049769	PPP1R3F	5.03685	4.94919	5.51371	3.99458	0.888607	0.93402	0.798249	0.993753	0.973798	0.975551	0.231271	0.213186	0.325867	-0.112681	0.0945957	-0.0180849
ENSG00000049860	HEXB	71.9961	94.8996	82.1344	98.1263	0.533658	0.982666	0.820471	0.566834	0.890697	0.855324	-0.4363	-0.0472584	-0.251053	0.203795	0.185247	0.389041
ENSG00000049883	PTCD2	7.43044	6.45829	6.83817	9.10339	0.88085	0.77587	0.794075	0.958812	0.976767	0.985622	-0.235603	-0.392562	-0.329181	-0.0633817	-0.0935774	-0.156959
ENSG00000050130	JKAMP	29.7835	33.1326	29.4615	25.5927	0.770252	0.630834	0.789581	0.915008	0.991807	0.891543	0.203991	0.348524	0.189301	0.159223	-0.0146905	0.144532
ENSG00000050165	DKK3	0.787238	0.215048	0.599403	0.319788	0.219124	1	0.445508	0.461666	0.896561	0.55105	0.264843	-0.066655	0.164187	-0.230842	-0.100656	-0.331498
ENSG00000050327	ARHGEF5	7.46242	8.84222	7.9464	9.54925	0.54259	0.921914	0.788525	0.722796	0.967726	0.904743	-0.287518	-0.091139	-0.215553	0.124414	0.0719653	0.196379
ENSG00000050393	CCDC90A	80.5481	70.2335	79.5042	71.0426	0.541895	0.986275	0.615406	0.480008	0.984105	0.563918	0.176497	-0.01607	0.158136	-0.174206	-0.0183606	-0.192567
ENSG00000050405	LIMA1	88.6308	63.6643	96.8195	46.9622	0.00176087	0.482187	0.00176087	0.415717	0.871546	0.24944	0.888333	0.423441	1.01313	-0.589687	0.124794	-0.464892
ENSG00000050426	LETMD1	19.4285	40.935	21.5128	30.7781	0.0483894	0.802516	0.369859	0.649617	0.921044	0.685406	-0.613201	0.389422	-0.479286	0.868708	0.133915	1.00262
ENSG00000050438	SLC4A8	1.43641	0.527578	1.54999	1.09331	0.94059	0.617091	0.917747	0.417771	0.988666	0.432415	0.151751	-0.291396	0.198664	-0.490059	0.0469128	-0.443147
ENSG00000050555	LAMC3	4.43361	6.34358	5.31034	6.16543	0.590609	0.988519	0.896358	0.652589	0.862422	0.896801	-0.3439	0.0311377	-0.15959	0.190728	0.18431	0.375038
ENSG00000050748	MAPK9	40.6899	28.408	39.5024	25.9544	0.0426481	0.920884	0.055704	0.230949	0.980236	0.292236	0.610819	0.121376	0.570119	-0.448744	-0.0407	-0.489444
ENSG00000050820	BCAR1	44.0625	37.5834	47.115	33.347	0.225004	0.8664	0.11483	0.779238	0.92844	0.658406	0.382005	0.163308	0.474576	-0.311268	0.092571	-0.218697
ENSG00000051009	FAM160A2	14.1172	13.9189	12.7589	14.2957	0.993325	0.989042	0.956009	0.992831	0.962067	0.972676	-0.0158902	-0.0337507	-0.142906	0.109155	-0.127016	-0.0178605
ENSG00000051108	HERPUD1	78.7151	111.011	72.9979	115.236	0.130819	0.975707	0.106119	0.197927	0.945897	0.153156	-0.538505	-0.0529524	-0.644494	0.591541	-0.105988	0.485553
ENSG00000051128	HOMER3	72.2908	61.5365	72.7699	75.2882	0.972366	0.761687	0.977944	0.828544	0.993509	0.825497	-0.0570646	-0.282663	-0.0477906	-0.234872	0.00927404	-0.225598
ENSG00000051180	RAD51	59.9295	79.8073	72.0021	51.2214	0.745707	0.570107	0.234158	0.726731	0.671388	0.943554	0.21862	0.620223	0.47556	0.144663	0.256939	0.401603
ENSG00000051341	POLQ	2.38266	2.93881	2.52984	2.07719	0.741794	0.622768	0.595984	0.763836	0.933572	0.8664	0.104232	0.276588	0.151885	0.124703	0.0476533	0.172357
ENSG00000051382	PIK3CB	44.5446	47.097	46.0271	41.301	0.927591	0.807339	0.86131	0.954643	0.977446	0.983597	0.104213	0.181235	0.149448	0.0317862	0.0452349	0.0770211
ENSG00000051523	CYBA	765.972	746.208	813.164	814.002	0.89661	0.831187	0.998212	0.976138	0.903776	0.839213	-0.087519	-0.125133	-0.00148235	-0.123651	0.0860366	-0.0376143
ENSG00000051596	THOC3	35.6381	40.6712	32.1143	41.0507	0.777016	0.993083	0.576505	0.8664	0.896801	0.723037	-0.193843	-0.012774	-0.33566	0.322886	-0.141817	0.181069
ENSG00000051620	HEBP2	17.7452	18.0215	16.1659	17.9985	0.988839	0.998181	0.843791	0.987684	0.880398	0.844884	-0.0183898	0.00165827	-0.138659	0.140317	-0.120269	0.0200481
ENSG00000051825	MPHOSPH9	18.2053	19.8898	19.5279	17.8526	0.992831	0.965544	0.971726	0.9739	0.978371	0.992831	0.0254058	0.140931	0.11688	0.0240512	0.0914738	0.115525
ENSG00000052126	PLEKHA5	2.94948	4.7463	3.78963	4.32573	0.231935	0.943739	0.874854	0.372257	0.695858	0.832716	-0.353955	0.0928645	-0.127761	0.220625	0.226194	0.44682
ENSG00000052344	PRSS8	1.16813	1.19421	1.03924	2.18782	0.571512	0.35122	0.310991	0.992541	0.976075	0.953741	-0.402568	-0.39074	-0.462489	0.0717486	-0.0599209	0.0118276
ENSG00000052723	SIKE1	26.9757	28.6617	36.0562	27.6539	0.990771	0.989159	0.822969	0.983597	0.788891	0.886631	-0.0333783	0.0482158	0.35991	-0.311694	0.393288	0.0815942
ENSG00000052749	RRP12	65.9571	77.1678	72.2822	72.2378	0.860956	0.917268	0.999295	0.69097	0.908678	0.944285	-0.12753	0.0927598	0.000862586	0.0918972	0.128392	0.220289
ENSG00000052795	FNIP2	2.43219	1.91305	2.81291	2.29869	0.978474	0.889074	0.844884	0.810251	0.907645	0.614594	0.0441227	-0.135604	0.163012	-0.298616	0.11889	-0.179726
ENSG00000052802	MSMO1	11.8329	9.65806	10.0939	8.2862	0.295269	0.736296	0.566921	0.69097	0.776651	0.966077	0.427394	0.180618	0.233569	-0.0529518	-0.193824	-0.246776
ENSG00000052841	TTC17	20.2255	15.7304	23.3841	11.1334	0.0928766	0.630537	0.0215676	0.732175	0.850239	0.481735	0.758975	0.432985	0.950685	-0.5177	0.191709	-0.325991
ENSG00000053254	FOXN3	9.44569	28.2542	17.7326	11.8569	0.770541	0.527194	0.69097	0.382965	0.447412	0.834971	-0.2758	1.12653	0.509977	0.616554	0.785777	1.40233
ENSG00000053371	AKR7A2	58.7652	65.74	69.1999	63.166	0.903006	0.956714	0.853633	0.739772	0.602421	0.934981	-0.100874	0.0558885	0.127756	-0.0718672	0.22863	0.156763
ENSG00000053372	MRTO4	124.274	129.562	112.188	136.879	0.943727	0.97597	0.797563	0.980618	0.935086	0.883431	-0.137271	-0.0780856	-0.282417	0.204332	-0.145147	0.0591852
ENSG00000053501	USE1	54.0034	62.0596	56.2542	53.7339	0.993804	0.750763	0.954061	0.758133	0.959489	0.869759	0.00695931	0.20086	0.063807	0.137053	0.0568477	0.1939
ENSG00000053747	LAMA3	3.89379	4.4729	3.94775	2.81678	0.464781	0.155146	0.476718	0.88035	0.99232	0.90775	0.291127	0.426343	0.304275	0.122068	0.0131484	0.135217
ENSG00000053770	AP5M1	11.2598	13.1294	13.7674	12.1973	0.962061	0.965544	0.92807	0.879953	0.812832	0.978474	-0.0985576	0.0917382	0.151328	-0.05959	0.249886	0.190296
ENSG00000053900	ANAPC4	11.4061	19.8188	11.1823	10.8897	0.979965	0.20103	0.98764	0.31061	0.990414	0.245749	0.0566709	0.759353	0.0323834	0.72697	-0.0242875	0.702682
ENSG00000053918	KCNQ1	1.24685	0.891166	1.14988	1.6433	0.814336	0.485679	0.716691	0.800316	0.976075	0.878905	-0.166205	-0.333594	-0.209949	-0.123645	-0.0437439	-0.167389
ENSG00000054116	TRAPPC3	67.453	74.7318	64.0561	66.358	0.983975	0.655801	0.959462	0.75927	0.932303	0.501478	0.0229268	0.166714	-0.0494184	0.216133	-0.0723452	0.143788
ENSG00000054118	THRAP3	55.4717	130.512	54.6495	68.0618	0.743121	0.630928	0.708648	0.504247	0.990565	0.49291	-0.285776	0.919423	-0.306565	1.22599	-0.0207885	1.2052
ENSG00000054148	PHPT1	56.435	65.3619	59.3958	61.7226	0.837958	0.939898	0.96285	0.675962	0.940004	0.84688	-0.124972	0.0801277	-0.0536652	0.133793	0.0713072	0.2051
ENSG00000054179	ENTPD2	1.60426	2.58066	1.45805	2.5892	0.397726	0.99738	0.22923	0.434655	0.965544	0.285682	-0.34854	-0.0026872	-0.408284	0.405597	-0.0597444	0.345852
ENSG00000054267	ARID4B	8.88953	13.8029	10.7381	9.76488	0.935227	0.479314	0.923898	0.248198	0.727715	0.629131	-0.111545	0.425703	0.114663	0.311039	0.226208	0.537248
ENSG00000054277	OPN3	53.9578	109.926	44.724	89.2292	0.00176087	0.690552	0.00176087	0.00582385	0.582325	0.00176087	-0.705156	0.294978	-0.965332	1.26031	-0.260175	1.00013
ENSG00000054282	SDCCAG8	20.8316	23.7185	14.9976	17.8071	0.95547	0.833254	0.940566	0.965402	0.847695	0.64011	0.205014	0.376789	-0.220687	0.597475	-0.425701	0.171775
ENSG00000054392	HHAT	0.669974	1.51024	0.549282	0.668623	0.998865	0.189397	0.896604	0.198196	0.898043	0.0700596	0.000730185	0.395474	-0.0660045	0.461479	-0.0667347	0.394744
ENSG00000054523	KIF1B	10.2515	10.161	9.12073	7.59963	0.210701	0.124109	0.45017	0.991044	0.780777	0.746674	0.351908	0.341211	0.212201	0.12901	-0.139707	-0.0106965
ENSG00000054598	FOXC1	27.7847	37.5339	39.1156	19.3957	0.00176087	0.00176087	0.00176087	0.00324853	0.00176087	0.925789	0.477251	0.885769	0.942365	-0.0565956	0.465114	0.408519
ENSG00000054611	TBC1D22A	17.124	17.1465	17.6185	16.0899	0.915228	0.944091	0.826257	0.998291	0.974073	0.97987	0.0801999	0.0818963	0.11703	-0.035134	0.0368304	0.00169638
ENSG00000054654	SYNE2	8.69374	17.0631	10.1002	9.22781	0.982063	0.706317	0.969286	0.682052	0.935326	0.736744	-0.07031	0.763706	0.107954	0.655752	0.178264	0.834016
ENSG00000054690	PLEKHH1	2.39497	2.45304	2.20401	3.6114	0.659026	0.830098	0.64088	0.992982	0.978474	0.979008	-0.352507	-0.33357	-0.416595	0.0830245	-0.0640872	0.0189373
ENSG00000054793	ATP9A	7.98766	9.56828	6.33129	7.64102	0.964763	0.245256	0.365667	0.737605	0.637194	0.0114792	0.0509609	0.262917	-0.210646	0.473563	-0.261607	0.211956
ENSG00000054938	CHRDL2	6.94891	3.87472	4.75954	6.01914	0.963477	0.79828	0.927201	0.684173	0.831503	0.951262	0.158264	-0.448927	-0.246522	-0.202405	-0.404787	-0.607192
ENSG00000054965	FAM168A	6.35872	6.94818	5.30693	5.05719	0.477306	0.410773	0.963983	0.924516	0.648677	0.532939	0.244188	0.3425	0.0501715	0.292329	-0.194017	0.0983122
ENSG00000054967	RELT	6.95291	7.71397	8.5076	6.04715	0.724402	0.312838	0.0689734	0.821076	0.457104	0.82083	0.153879	0.271583	0.384883	-0.1133	0.231005	0.117704
ENSG00000055044	NOP58	133.27	109.865	137.688	108.723	0.369859	0.990414	0.274176	0.540588	0.97036	0.439749	0.288887	0.0148038	0.335253	-0.320449	0.0463662	-0.274083
ENSG00000055070	SZRD1	143.61	124.468	148.509	144.497	0.992738	0.790894	0.976871	0.797255	0.969205	0.712437	-0.00876168	-0.212099	0.0389786	-0.251077	0.0477403	-0.203337
ENSG00000055130	CUL1	37.6738	37.3471	38.6251	35.676	0.883431	0.91686	0.768471	0.988675	0.967415	0.948983	0.0745408	0.0626115	0.108726	-0.0461141	0.0341848	-0.0119293
ENSG00000055147	FAM114A2	10.9486	14.0511	10.0634	12.5248	0.951495	0.976274	0.896801	0.893564	0.971875	0.843617	-0.165722	0.144154	-0.267882	0.412036	-0.10216	0.309876
ENSG00000055208	TAB2	14.0593	15.3961	18.6353	13.4063	0.942934	0.759432	0.0241497	0.880221	0.0882043	0.618139	0.0598886	0.175243	0.421594	-0.246351	0.361705	0.115355
ENSG00000055211	GINM1	11.4018	9.28808	11.4862	13.464	0.563985	0.0393514	0.585954	0.447556	0.991974	0.416148	-0.206487	-0.454113	-0.19743	-0.256684	0.00905712	-0.247627
ENSG00000055332	EIF2AK2	30.343	36.2037	29.0773	26.3652	0.883614	0.663183	0.934704	0.860956	0.977944	0.785296	0.189331	0.42959	0.131739	0.297851	-0.0575923	0.240259
ENSG00000055483	USP36	71.5883	181.949	84.2236	93.1866	0.28166	0.0959777	0.844142	0.00818108	0.661422	0.0386801	-0.371282	0.950475	-0.142676	1.09315	0.228606	1.32176
ENSG00000055609	MLL3	7.20945	10.6219	6.76046	8.10989	0.946561	0.824239	0.868229	0.621896	0.971482	0.479475	-0.13458	0.320162	-0.206689	0.526851	-0.0721084	0.454742
ENSG00000055917	PUM2	22.3842	21.747	27.006	22.2317	0.99484	0.989344	0.792494	0.985622	0.776458	0.77786	0.00905102	-0.0291504	0.259456	-0.288606	0.250405	-0.0382014
ENSG00000055950	MRPL43	95.9507	101.645	94.7231	96.1596	0.997207	0.95988	0.987652	0.958579	0.989056	0.940985	-0.00307357	0.0784492	-0.0212689	0.0997181	-0.0181953	0.0815228
ENSG00000055955	ITIH4	2.02327	2.08806	0.34451	0.803125	0.572675	0.48948	0.481735	0.993501	0.0811719	0.0359232	0.521332	0.54438	-0.25775	0.80213	-0.779082	0.0230478
ENSG00000056050	C4orf27	31.397	20.9898	27.0765	24.9143	0.66196	0.830716	0.938307	0.371994	0.837856	0.665238	0.311346	-0.227379	0.111481	-0.33886	-0.199865	-0.538725
ENSG00000056097	ZFR	62.9523	80.7223	64.9724	52.8316	0.433335	0.386464	0.251604	0.659714	0.966709	0.699276	0.244373	0.593269	0.288559	0.30471	0.0441861	0.348896
ENSG00000056277	ZNF280C	0.388803	0.353487	0.296183	0.269663	0.740297	0.909615	1	0.976618	0.829604	0.952425	0.0738098	0.0523218	0.0167595	0.0355623	-0.0570503	-0.021488
ENSG00000056558	TRAF1	0.194798	0.610962	3.15509	0.0579967	1	0.293263	0.00176087	0.506714	0.00176087	0.372486	0.0928475	0.343341	1.32476	-0.981416	1.23191	0.250493
ENSG00000056586	RC3H2	18.4143	18.4788	18.2778	15.3769	0.81947	0.812832	0.827042	0.996769	0.994338	0.992594	0.232409	0.23696	0.22273	0.01423	-0.00967896	0.00455108
ENSG00000056661	PCGF2	20.2929	21.7332	19.7359	24.4004	0.719139	0.863517	0.64166	0.952425	0.984112	0.911551	-0.243975	-0.153653	-0.28048	0.126827	-0.0365045	0.0903223
ENSG00000056736	IL17RB	3.86628	3.95554	3.95861	2.84255	0.577395	0.438992	0.478491	0.987652	0.988162	0.999349	0.276679	0.298465	0.299209	-0.000743498	0.0225299	0.0217864
ENSG00000056972	TRAF3IP2	27.5335	22.4966	27.5033	23.0955	0.806731	0.985622	0.759144	0.780722	0.998997	0.725392	0.234924	-0.0348472	0.233448	-0.268295	-0.00147601	-0.269771
ENSG00000056998	GYG2	2.83702	1.29333	1.445	1.99744	0.736304	0.66893	0.655791	0.293263	0.253443	0.957451	0.275042	-0.279529	-0.214572	-0.0649569	-0.489615	-0.554571
ENSG00000057019	DCBLD2	16.3511	27.471	19.0284	12.9893	0.866387	0.56643	0.697819	0.708256	0.932252	0.8269	0.291934	0.975363	0.488406	0.486957	0.196473	0.683429
ENSG00000057252	SOAT1	57.806	64.0186	57.7653	56.1721	0.975614	0.696645	0.975707	0.80457	0.99886	0.800533	0.0399628	0.182545	0.0389807	0.143564	-0.000982137	0.142582
ENSG00000057294	PKP2	16.4816	18.9482	18.9064	13.0449	0.490091	0.663891	0.177245	0.899073	0.797141	0.998212	0.296815	0.477552	0.47467	0.00288163	0.177855	0.180737
ENSG00000057608	GDI2	287.261	270.206	301.778	272.465	0.904253	0.990414	0.720808	0.901848	0.921618	0.750046	0.0757496	-0.0119233	0.146395	-0.158319	0.0706456	-0.087673
ENSG00000057657	PRDM1	2.45584	32.6227	5.15126	1.91148	0.865517	0.00176087	0.0180295	0.00176087	0.272115	0.112511	0.187983	3.14593	0.870483	2.27545	0.6825	2.95795
ENSG00000057663	ATG5	19.4866	27.8237	17.2311	16.8067	0.751553	0.245058	0.984346	0.480113	0.849606	0.288198	0.19219	0.665213	0.0321946	0.633018	-0.159996	0.473022
ENSG00000057704	TMCC3	0.453903	0.0699948	0.239422	0.17902	0.671793	1	1	0.50795	0.731916	1	0.171399	-0.0740523	0.039447	-0.113499	-0.131952	-0.245451
ENSG00000057757	PITHD1	27.8096	33.0015	25.0782	37.3791	0.0309815	0.626944	0.00176087	0.413908	0.748141	0.0689734	-0.401653	-0.170013	-0.540298	0.370285	-0.138645	0.23164
ENSG00000057935	MTA3	30.3114	39.5678	27.5217	20.3902	0.302438	0.0574364	0.467619	0.727875	0.940216	0.510294	0.529176	0.892599	0.398908	0.493691	-0.130267	0.363423
ENSG00000058056	USP13	23.8764	45.8163	25.0691	19.4682	0.599585	0.427252	0.532413	0.577176	0.972497	0.613334	0.269436	1.1553	0.334446	0.820856	0.06501	0.885866
ENSG00000058063	ATP11B	13.7216	17.7393	17.0612	12.5288	0.936609	0.665173	0.419667	0.783167	0.657895	0.982307	0.113833	0.442155	0.391723	0.0504319	0.277891	0.328323
ENSG00000058091	CDK14	6.96873	6.05873	4.63866	5.02128	0.94024	0.964318	0.98787	0.97652	0.909181	0.93664	0.35317	0.198818	-0.080842	0.27966	-0.434012	-0.154351
ENSG00000058262	SEC61A1	245.042	331.752	259.597	292.202	0.73229	0.884306	0.863517	0.518421	0.960361	0.644476	-0.252051	0.181969	-0.169461	0.35143	0.0825897	0.43402
ENSG00000058272	PPP1R12A	26.7869	43.3351	29.9029	29.8519	0.930701	0.790443	0.998844	0.705778	0.940985	0.818691	-0.145967	0.509249	0.00230814	0.506941	0.148275	0.655216
ENSG00000058453	CROCC	2.00437	2.90903	1.28273	2.78018	0.816247	0.986677	0.17938	0.817313	0.712437	0.224362	-0.25549	0.038373	-0.542169	0.580542	-0.286679	0.293863
ENSG00000058600	POLR3E	77.0023	79.6292	81.856	74.392	0.979705	0.943467	0.902394	0.978474	0.955988	0.98152	0.0484731	0.0956638	0.134492	-0.0388287	0.0860194	0.0471907
ENSG00000058668	ATP2B4	14.6268	14.6111	15.7381	10.0382	0.00931705	0.675783	0.00176087	0.999143	0.860418	0.9387	0.465891	0.464528	0.559232	-0.0947039	0.093341	-0.00136292
ENSG00000058673	ZC3H11A	14.6941	13.3296	15.7347	11.4986	0.464923	0.862433	0.284836	0.904119	0.917038	0.783248	0.306529	0.18351	0.393765	-0.210255	0.0872366	-0.123018
ENSG00000058729	RIOK2	79.479	58.8049	75.2299	67.5634	0.760791	0.909658	0.889428	0.680689	0.960174	0.758133	0.2281	-0.194141	0.150831	-0.344972	-0.0772688	-0.422241
ENSG00000058799	YIPF1	25.5394	33.3309	27.3744	30.513	0.50221	0.863946	0.785296	0.2568	0.908869	0.519672	-0.23952	0.119914	-0.146457	0.266371	0.0930623	0.359433
ENSG00000058804	TMEM48	65.6199	73.3934	64.9269	63.1334	0.94102	0.502341	0.964691	0.680846	0.987097	0.638968	0.0540503	0.211041	0.0391887	0.171852	-0.0148617	0.15699
ENSG00000058866	DGKG	13.7517	6.00406	13.0847	12.7821	0.992541	0.900087	0.996639	0.931674	0.995592	0.939094	0.0916563	-0.885047	0.0292348	-0.914282	-0.0624215	-0.976704
ENSG00000059122	FLYWCH1	79.8638	62.3977	80.1312	75.4021	0.947819	0.666993	0.948983	0.414942	0.995956	0.443499	0.0808529	-0.265364	0.0855577	-0.350921	0.00470474	-0.346216
ENSG00000059145	UNKL	19.6153	32.3658	22.0701	26.0507	0.65798	0.908869	0.854337	0.691958	0.903765	0.761246	-0.375984	0.292937	-0.220795	0.513731	0.155189	0.668921
ENSG00000059378	PARP12	21.3151	20.0503	22.1352	17.1501	0.38684	0.579566	0.181633	0.920893	0.963859	0.783144	0.283913	0.203446	0.333787	-0.13034	0.0498742	-0.0804663
ENSG00000059573	ALDH18A1	101.754	146.044	112.743	114.287	0.773498	0.540733	0.987857	0.300868	0.83749	0.524951	-0.164523	0.348336	-0.0192837	0.36762	0.145239	0.512859
ENSG00000059588	TARBP1	21.0562	16.5953	20.6623	16.8164	0.66509	0.99105	0.814222	0.532939	0.989344	0.748201	0.293164	-0.0170526	0.268304	-0.285356	-0.0248605	-0.310217
ENSG00000059691	PET112	14.76	24.4804	16.6327	18.1791	0.796924	0.74793	0.935425	0.54259	0.913497	0.621896	-0.26784	0.392063	-0.115025	0.507088	0.152815	0.659903
ENSG00000059728	MXD1	1.01462	3.72087	2.5254	1.07937	0.984874	0.180865	0.358158	0.167064	0.356616	0.861298	-0.0306591	0.893599	0.55541	0.338189	0.586069	0.924258
ENSG00000059758	CDK17	15.9907	24.4609	21.7181	13.33	0.867226	0.444357	0.306549	0.644157	0.619222	0.952596	0.230894	0.787504	0.629631	0.157874	0.398737	0.556611
ENSG00000059769	DNAJC25	14.5619	12.5639	14.6187	11.7083	0.643478	0.946561	0.66893	0.711664	0.995538	0.732474	0.272819	0.0873471	0.277758	-0.190411	0.00493934	-0.185471
ENSG00000059804	SLC2A3	70.9526	60.7976	81.6127	42.7251	0.0508851	0.322237	0.00931705	0.816092	0.848125	0.48517	0.705875	0.489625	0.902637	-0.413013	0.196763	-0.21625
ENSG00000059915	PSD	0.493639	0.592195	0.758197	0.564101	0.98438	0.992559	0.952172	0.97676	0.887026	0.954586	-0.0402005	0.0157212	0.105272	-0.0895513	0.145473	0.0559216
ENSG00000060069	CTDP1	10.1135	9.98349	8.96844	11.455	0.652491	0.595523	0.148422	0.986378	0.694328	0.748503	-0.151527	-0.167094	-0.294784	0.12769	-0.143257	-0.0155676
ENSG00000060138	CSDA	938.299	921.53	1070.05	1042.39	0.722175	0.678664	0.974962	0.982287	0.62718	0.590521	-0.151469	-0.17743	0.0377116	-0.215141	0.189181	-0.0259608
ENSG00000060237	WNK1	129.318	106.61	134.521	90.3824	0.47651	0.873466	0.403758	0.797726	0.980618	0.731056	0.507375	0.233467	0.563433	-0.329966	0.0560582	-0.273908
ENSG00000060339	CCAR1	118.149	102.053	116.127	101.615	0.786719	0.995616	0.829604	0.782863	0.988666	0.831356	0.213592	0.00608569	0.189106	-0.18302	-0.0244859	-0.207506
ENSG00000060491	OGFR	35.46	45.5568	34.0155	41.008	0.5028	0.815889	0.3391	0.349191	0.942064	0.251604	-0.199254	0.145047	-0.255987	0.401034	-0.056733	0.344301
ENSG00000060642	PIGV	5.59945	6.68921	6.257	7.91756	0.47193	0.845874	0.722796	0.818284	0.920884	0.967415	-0.38409	-0.19076	-0.264368	0.0736073	0.119723	0.19333
ENSG00000060656	PTPRU	17.446	23.832	11.4563	21.7416	0.840217	0.971432	0.142	0.806294	0.542666	0.291203	-0.287944	0.121742	-0.819135	0.940878	-0.531192	0.409686
ENSG00000060688	SNRNP40	52.0411	87.1802	49.6578	50.3131	0.979289	0.39119	0.990481	0.426466	0.966778	0.376565	0.0468848	0.769551	-0.0181861	0.787737	-0.0650708	0.722666
ENSG00000060749	QSER1	23.9529	29.6263	22.6964	17.8122	0.51782	0.434815	0.591579	0.858519	0.972475	0.790935	0.389507	0.674736	0.317912	0.356824	-0.071595	0.285229
ENSG00000060762	MPC1	15.1037	20.9093	16.7796	12.8618	0.807523	0.17938	0.57834	0.487603	0.91167	0.732716	0.2027	0.624325	0.337557	0.286767	0.134858	0.421625
ENSG00000060971	ACAA1	10.6693	11.9092	10.5277	9.11152	0.776307	0.605627	0.840578	0.894151	0.990821	0.897015	0.189281	0.323983	0.173065	0.150918	-0.0162152	0.134703
ENSG00000061273	HDAC7	31.1495	35.4543	31.4142	32.0769	0.977446	0.919297	0.984755	0.862433	0.992317	0.904275	-0.039807	0.136337	-0.0283328	0.16467	0.0114742	0.176144
ENSG00000061455	PRDM6	1.57959	0.108691	1.6573	0.103265	0.02647	1	0.02647	0.368281	0.991807	0.36431	0.767164	0.00371707	0.798148	-0.794431	0.0309846	-0.763447
ENSG00000061656	SPAG4	1.25586	1.2371	1.31875	2.00099	0.718649	0.880524	0.773647	0.995976	0.987128	0.98902	-0.297318	-0.305655	-0.269717	-0.035938	0.0276013	-0.00833673
ENSG00000061676	NCKAP1	43.257	15.651	46.5921	10.7956	0.00176087	0.23631	0.00176087	0.00176087	0.920884	0.00176087	1.82249	0.464102	1.92507	-1.46097	0.102581	-1.35839
ENSG00000061794	MRPS35	142.479	163.633	148.319	138.976	0.980873	0.815261	0.934534	0.850671	0.967863	0.923256	0.0354102	0.232541	0.0925778	0.139963	0.0571676	0.19713
ENSG00000061936	SFSWAP	32.8277	32.1555	38.9238	37.2369	0.950884	0.929395	0.984848	0.992159	0.927688	0.896801	-0.171976	-0.200093	0.0607291	-0.260822	0.232705	-0.0281173
ENSG00000061938	TNK2	39.4008	35.1915	42.5411	50.2564	0.884919	0.730306	0.96067	0.935598	0.978403	0.889243	-0.335949	-0.490635	-0.230471	-0.260164	0.105479	-0.154686
ENSG00000061987	MON2	6.72078	9.09939	6.85384	6.26305	0.898656	0.577545	0.83647	0.654243	0.982825	0.675793	0.0777828	0.425734	0.0996289	0.326105	0.0218461	0.347951
ENSG00000062194	GPBP1	38.9986	40.1858	54.4371	37.2416	0.966942	0.935721	0.0886496	0.981382	0.183014	0.341105	0.0631908	0.104374	0.52426	-0.419886	0.461069	0.0411828
ENSG00000062282	DGAT2	6.40673	5.47446	6.44515	6.07632	0.950105	0.896801	0.941744	0.793033	0.993501	0.778132	0.0578467	-0.111729	0.064425	-0.176154	0.00657831	-0.169575
ENSG00000062370	ZFP112	1.04989	0.954566	0.799049	1.15601	0.975547	0.899144	0.845524	0.963775	0.890794	0.923791	-0.0493446	-0.0951555	-0.173165	0.0780095	-0.12382	-0.045811
ENSG00000062485	CS	196.302	204.463	212.29	205.276	0.955027	0.994368	0.968118	0.95932	0.881462	0.962197	-0.0638539	-0.00566982	0.0480114	-0.0536813	0.111865	0.058184
ENSG00000062582	MRPS24	294.889	325.485	298.591	284.987	0.954459	0.489221	0.924499	0.698888	0.986197	0.766063	0.0489383	0.190443	0.0668164	0.123627	0.0178782	0.141505
ENSG00000062598	ELMO2	14.9361	20.8141	13.6167	17.4591	0.826257	0.85253	0.571349	0.644922	0.933572	0.468758	-0.200343	0.229481	-0.317355	0.546836	-0.117012	0.429824
ENSG00000062650	WAPAL	34.1852	28.2561	34.6138	23.6852	0.540143	0.862694	0.527194	0.820275	0.992756	0.81318	0.494462	0.236289	0.51145	-0.275161	0.0169878	-0.258174
ENSG00000062716	VMP1	181.284	100.065	208.624	105.022	0.499044	0.984346	0.311831	0.431262	0.954571	0.257421	0.776173	-0.0684192	0.976762	-1.04518	0.200589	-0.844593
ENSG00000062725	APPBP2	7.54236	5.90897	7.3332	9.34138	0.887583	0.667631	0.87507	0.88605	0.990826	0.920485	-0.249178	-0.520034	-0.281152	-0.238882	-0.0319743	-0.270856
ENSG00000062822	POLD1	90.6451	106.268	93.8631	96.9045	0.964604	0.947226	0.982897	0.882488	0.982666	0.920463	-0.0943215	0.130499	-0.0450606	0.175559	0.0492609	0.22482
ENSG00000063046	EIF4B	325.274	347.912	333.672	329.663	0.984112	0.90208	0.985622	0.851553	0.969524	0.939503	-0.0192191	0.0772741	0.0173341	0.0599399	0.0365532	0.0964931
ENSG00000063127	SLC6A16	0.370897	0.0837507	0.514416	0.363369	0.994184	0.535981	0.886393	0.524478	0.889428	0.464923	0.00458809	-0.181662	0.0893785	-0.271041	0.0847904	-0.18625
ENSG00000063169	GLTSCR1	7.52149	3.02456	5.28855	4.15852	0.745879	0.930369	0.94224	0.674538	0.907641	0.831794	0.628604	-0.293586	0.243048	-0.536635	-0.385556	-0.92219
ENSG00000063176	SPHK2	8.73657	13.3782	10.901	9.90691	0.971222	0.923847	0.97866	0.864898	0.93713	0.962782	-0.149266	0.369088	0.115684	0.253404	0.26495	0.518353
ENSG00000063177	RPL18	2605.93	2217.09	2671.71	2489.13	0.897015	0.527304	0.778815	0.248198	0.963477	0.138717	0.0661048	-0.166832	0.102043	-0.268875	0.0359378	-0.232937
ENSG00000063180	CA11	12.3996	7.63136	6.52627	11.7271	0.989619	0.809541	0.696326	0.666878	0.47387	0.929266	0.0690019	-0.511215	-0.68704	0.175825	-0.756042	-0.580217
ENSG00000063241	ISOC2	126.793	155.805	134.364	146.401	0.415201	0.887583	0.741847	0.283655	0.870656	0.543592	-0.204447	0.0886421	-0.122038	0.21068	0.0824086	0.293089
ENSG00000063244	U2AF2	406.22	311.677	409.037	343.874	0.421581	0.786676	0.36605	0.145185	0.991756	0.122008	0.2391	-0.140967	0.249022	-0.389989	0.0099214	-0.380067
ENSG00000063245	EPN1	208.801	143.724	211.098	161.26	0.164331	0.818319	0.167902	0.117869	0.990092	0.0991657	0.36871	-0.163933	0.384346	-0.548279	0.0156353	-0.532643
ENSG00000063322	MED29	22.1773	29.2842	20.8823	21.7325	0.987652	0.724383	0.976794	0.757784	0.961961	0.680689	0.0267891	0.39857	-0.052632	0.451202	-0.0794211	0.371781
ENSG00000063438	AHRR	3.55626	3.56745	4.74571	3.69653	0.989056	0.990685	0.895664	0.999024	0.889315	0.920798	-0.0359693	-0.0330667	0.243887	-0.276954	0.279856	0.00290259
ENSG00000063587	ZNF275	1.85426	2.39993	1.1848	2.90694	0.0125108	0.614792	0.00176087	0.45621	0.0496622	0.00176087	-0.34837	-0.157343	-0.623621	0.466278	-0.275251	0.191027
ENSG00000063601	MTMR1	22.9152	15.1998	23.2058	21.4088	0.978474	0.575577	0.97556	0.521115	0.994716	0.506035	0.0899752	-0.444659	0.106705	-0.551364	0.0167296	-0.534634
ENSG00000063660	GPC1	63.4149	62.9336	69.6365	62.912	0.992783	0.999581	0.87842	0.992831	0.889317	0.877513	0.0111341	0.000479989	0.14221	-0.14173	0.131076	-0.0106541
ENSG00000063761	ADCK1	5.92805	7.45344	6.76081	6.84018	0.773647	0.932252	0.991807	0.628137	0.838748	0.93237	-0.15711	0.0967637	-0.0130115	0.109775	0.144098	0.253873
ENSG00000063854	HAGH	67.4971	54.4027	61.2643	59.7935	0.841715	0.936021	0.983952	0.729422	0.883614	0.893565	0.169498	-0.131691	0.0339365	-0.165627	-0.135561	-0.301189
ENSG00000063978	RNF4	46.261	29.4401	49.2455	30.0747	0.483071	0.991258	0.353099	0.399873	0.968512	0.255266	0.589422	-0.02883	0.67599	-0.70482	0.0865675	-0.618252
ENSG00000064012	CASP8	20.6752	31.5269	19.8329	21.6367	0.982287	0.751455	0.973016	0.604881	0.982645	0.642692	-0.0599134	0.50429	-0.114525	0.618815	-0.0546115	0.564204
ENSG00000064042	LIMCH1	68.1874	27.2279	71.1751	32.3465	0.0134839	0.854871	0.00582385	0.00176087	0.977318	0.00176087	1.03105	-0.232817	1.09119	-1.32401	0.0601408	-1.26387
ENSG00000064102	ASUN	165.559	130.649	160.26	114.368	0.0445736	0.766106	0.0562965	0.442316	0.972497	0.530667	0.525975	0.188919	0.479613	-0.290694	-0.0463618	-0.337055
ENSG00000064115	TM7SF3	314.764	707.638	341.71	351.177	0.96566	0.598568	0.990688	0.524088	0.977058	0.577579	-0.156983	1.00669	-0.0391996	1.04589	0.117783	1.16367
ENSG00000064195	DLX3	2.39514	4.09288	2.84366	5.20069	0.00176087	0.843928	0.0848972	0.663891	0.834452	0.79194	-0.712226	-0.241011	-0.572038	0.331027	0.140188	0.471215
ENSG00000064199	SPA17	6.76387	3.58632	6.45049	7.05909	0.984153	0.62568	0.965413	0.645927	0.982503	0.669012	-0.0477981	-0.697468	-0.100331	-0.597137	-0.0525331	-0.64967
ENSG00000064205	WISP2	31.1811	29.9712	30.8066	26.516	0.516904	0.747464	0.56343	0.964318	0.987983	0.977469	0.21859	0.165001	0.202214	-0.0372132	-0.0163756	-0.0535888
ENSG00000064309	CDON	4.05756	6.79155	4.17221	4.6041	0.955423	0.771669	0.970667	0.639584	0.990414	0.702805	-0.124625	0.412756	-0.0975748	0.51033	0.0270504	0.537381
ENSG00000064313	TAF2	20.0201	32.3743	22.48	28.5422	0.323405	0.895732	0.63069	0.267311	0.910326	0.484139	-0.471983	0.170526	-0.3192	0.489727	0.152783	0.642509
ENSG00000064419	TNPO3	23.9725	43.6371	23.6219	46.1665	0.00176087	0.870656	0.00176087	0.00176087	0.982287	0.00176087	-0.891045	-0.077823	-0.910653	0.83283	-0.0196074	0.813222
ENSG00000064489	MEF2BNB-MEF2B	2.10204	1.32289	2.47325	2.14799	0.994184	0.8717	0.970335	0.920893	0.971875	0.815356	-0.0160709	-0.319974	0.108911	-0.428885	0.124982	-0.303903
ENSG00000064490	RFXANK	143.213	119.078	147.835	102.873	0.467759	0.927644	0.398543	0.862433	0.982307	0.818284	0.469527	0.207293	0.514731	-0.307438	0.045204	-0.262234
ENSG00000064545	TMEM161A	130.306	124.178	128.919	134.128	0.982307	0.952633	0.97736	0.975812	0.992159	0.981477	-0.0410854	-0.109503	-0.0562894	-0.0532141	-0.015204	-0.0684181
ENSG00000064547	LPAR2	0.898522	0.281368	1.76393	0.719918	0.925527	0.28667	0.32695	0.0649905	0.454192	0.00176087	0.0917543	-0.253664	0.468677	-0.722341	0.376922	-0.345418
ENSG00000064601	CTSA	47.8614	51.4133	47.2635	45.1379	0.892909	0.697061	0.928948	0.890857	0.985804	0.852165	0.0810359	0.180312	0.0636316	0.11668	-0.0174043	0.0992756
ENSG00000064607	SUGP2	22.1172	24.6128	24.6119	25.9597	0.870792	0.975812	0.976794	0.933847	0.939503	0.999867	-0.213286	-0.0712286	-0.0712774	4.87903e-05	0.142009	0.142058
ENSG00000064651	SLC12A2	8.49224	6.32387	6.73195	5.58232	0.405724	0.849663	0.719883	0.538466	0.661422	0.927644	0.468611	0.134615	0.203665	-0.0690494	-0.264947	-0.333996
ENSG00000064652	SNX24	11.6543	10.4062	12.7656	12.5405	0.974036	0.862422	0.991807	0.946561	0.962782	0.831355	-0.0907215	-0.229016	0.0221631	-0.251179	0.112885	-0.138294
ENSG00000064666	CNN2	179.126	188.066	169.858	199.153	0.732158	0.908915	0.461666	0.937815	0.922847	0.749215	-0.1513	-0.0817928	-0.227076	0.145283	-0.0757766	0.0695068
ENSG00000064687	ABCA7	8.82867	18.8201	9.20014	9.73121	0.937089	0.40606	0.977446	0.304075	0.984136	0.37463	-0.115496	0.827625	-0.0668351	0.89446	0.0486607	0.943121
ENSG00000064703	DDX20	31.2077	31.9953	27.9488	28.0235	0.815889	0.778846	0.996629	0.982307	0.816068	0.782426	0.145426	0.179243	-0.00359397	0.182837	-0.14902	0.0338175
ENSG00000064726	BTBD1	47.7791	29.3929	52.4898	24.1749	0.00176087	0.453302	0.00176087	0.00176087	0.788403	0.00176087	0.927356	0.262254	1.0578	-0.795548	0.130446	-0.665102
ENSG00000064932	SBNO2	23.4043	36.9938	34.37	30.3446	0.64007	0.790744	0.899324	0.226095	0.365667	0.963477	-0.348452	0.26972	0.169224	0.100496	0.517676	0.618172
ENSG00000064933	PMS1	26.6173	71.081	26.9017	24.6793	0.982063	0.474143	0.981418	0.522411	0.996456	0.563064	0.101167	1.45378	0.115434	1.33834	0.0142668	1.35261
ENSG00000064961	HMG20B	235.225	253.678	227.502	251.067	0.950807	0.991807	0.893947	0.938162	0.980236	0.87781	-0.0932633	0.0148086	-0.141013	0.155821	-0.0477493	0.108072
ENSG00000064995	TAF11	27.3416	43.2012	30.1542	36.9631	0.293263	0.797141	0.583199	0.0991657	0.87656	0.273097	-0.409161	0.214253	-0.277101	0.491354	0.13206	0.623414
ENSG00000064999	ANKS1A	5.7871	2.91274	5.3932	3.37235	0.00176087	0.657472	0.00176087	0.00176087	0.8693	0.00176087	0.535533	-0.129025	0.460646	-0.589671	-0.0748872	-0.664558
ENSG00000065000	AP3D1	64.7944	102.208	67.8392	73.8408	0.765037	0.689579	0.890439	0.583322	0.966127	0.622482	-0.183247	0.45842	-0.118937	0.577357	0.0643099	0.641667
ENSG00000065029	ZNF76	6.67799	18.9428	7.7988	11.1149	0.00324853	0.399719	0.0472099	0.00704704	0.678144	0.0483894	-0.595774	0.675248	-0.42053	1.09578	0.175244	1.27102
ENSG00000065054	SLC9A3R2	13.4374	11.4112	12.0364	14.6388	0.920989	0.598649	0.605012	0.838505	0.885634	0.970592	-0.108122	-0.311113	-0.245378	-0.0657346	-0.137257	-0.202991
ENSG00000065057	NTHL1	72.2692	92.2643	69.4661	77.937	0.960361	0.857999	0.916267	0.697892	0.97983	0.600595	-0.106099	0.237848	-0.161604	0.399452	-0.055505	0.343947
ENSG00000065060	UHRF1BP1	7.21234	10.0574	7.87407	9.83481	0.0445736	0.97983	0.303641	0.0483894	0.837389	0.292832	-0.361397	0.0268823	-0.26132	0.288202	0.100077	0.388279
ENSG00000065135	GNAI3	59.7905	72.9484	59.7453	64.5848	0.756093	0.480893	0.751252	0.0905805	0.99816	0.0901295	-0.107808	0.170705	-0.108864	0.279568	-0.00105572	0.278513
ENSG00000065150	IPO5	252.746	324.22	257.094	261.562	0.97736	0.741969	0.987451	0.648203	0.986229	0.673539	-0.0490829	0.307703	-0.0246668	0.33237	0.0244161	0.356786
ENSG00000065154	OAT	15.5456	21.7444	13.8791	16.8826	0.932605	0.553125	0.611462	0.404419	0.87428	0.10336	-0.105948	0.33053	-0.249928	0.580458	-0.14398	0.436478
ENSG00000065183	WDR3	77.153	85.7484	72.3205	70.5742	0.866987	0.650652	0.981477	0.870082	0.932738	0.73787	0.125187	0.273916	0.0343034	0.239613	-0.0908838	0.148729
ENSG00000065243	PKN2	29.9814	22.1873	28.1473	19.5099	0.115337	0.905389	0.244315	0.63125	0.955099	0.745124	0.572232	0.169249	0.487028	-0.317779	-0.0852043	-0.402983
ENSG00000065268	WDR18	59.2241	75.1093	57.7605	69.3252	0.717509	0.916063	0.672544	0.355405	0.980359	0.311608	-0.220312	0.112493	-0.25522	0.367713	-0.0349074	0.332805
ENSG00000065308	TRAM2	9.72894	2.31338	9.27896	2.33802	0.00176087	0.991137	0.00176087	0.00176087	0.921824	0.00176087	1.43496	-0.00821788	1.37853	-1.38674	-0.0564386	-1.44318
ENSG00000065325	GLP2R	54.9138	58.9557	54.8642	54.3787	0.992831	0.94436	0.993494	0.955951	0.999295	0.9528	0.0136283	0.112611	0.0123704	0.10024	-0.00125785	0.0989826
ENSG00000065328	MCM10	31.5301	34.5649	33.6962	24.0076	0.693685	0.688356	0.526172	0.965074	0.966077	0.989344	0.366524	0.491526	0.456837	0.0346889	0.0903137	0.125003
ENSG00000065357	DGKA	16.5245	18.5433	8.80157	10.0196	0.640789	0.702615	0.967415	0.973798	0.394949	0.560414	0.624046	0.773279	-0.154148	0.927427	-0.778194	0.149233
ENSG00000065361	ERBB3	6.16634	2.53992	4.52437	4.37178	0.888151	0.760962	0.991807	0.587914	0.924516	0.773647	0.357993	-0.48903	0.0341421	-0.523172	-0.323851	-0.847023
ENSG00000065413	ANKRD44	10.2747	3.70185	7.13387	3.98658	0.523167	0.985622	0.671712	0.603497	0.909658	0.733619	1.03588	-0.070302	0.609494	-0.679796	-0.42639	-1.10619
ENSG00000065427	KARS	230.715	203.247	237.474	196.251	0.250016	0.959462	0.127348	0.64011	0.955748	0.510876	0.231236	0.050033	0.272541	-0.222508	0.0413048	-0.181203
ENSG00000065457	ADAT1	30.8257	51.8964	31.6852	28.5357	0.972366	0.361182	0.952425	0.467031	0.988675	0.484408	0.104329	0.819692	0.141618	0.678074	0.0372891	0.715363
ENSG00000065485	PDIA5	15.3783	29.2867	15.5895	18.6886	0.759535	0.545797	0.805912	0.293074	0.991807	0.314289	-0.251549	0.596713	-0.234122	0.830835	0.0174275	0.848263
ENSG00000065491	TBC1D22B	3.89339	3.04297	4.65132	4.28006	0.870656	0.280796	0.888859	0.534592	0.604488	0.133286	-0.0916806	-0.316505	0.0828623	-0.399367	0.174543	-0.224824
ENSG00000065518	NDUFB4	308.408	263.255	309.509	293.385	0.893564	0.614051	0.882775	0.318204	0.993799	0.309711	0.0715692	-0.155217	0.0766773	-0.231894	0.00510811	-0.226786
ENSG00000065526	SPEN	18.3447	14.2098	19.9007	13.058	0.542789	0.901025	0.115793	0.655418	0.932303	0.169504	0.434123	0.106336	0.540447	-0.434111	0.106324	-0.327787
ENSG00000065534	MYLK	0.396137	0.198964	0.317083	0.179924	0.456334	1	1	0.541827	0.932311	1	0.136433	0.0125461	0.0880319	-0.0754857	-0.0484007	-0.123886
ENSG00000065548	ZC3H15	56.007	48.9234	58.5622	44.6941	0.415373	0.899144	0.241894	0.782847	0.95681	0.647624	0.312987	0.125088	0.375177	-0.250089	0.0621906	-0.187898
ENSG00000065559	MAP2K4	24.5233	47.6103	23.6329	25.7003	0.981782	0.567269	0.957451	0.521933	0.982999	0.486614	-0.0626413	0.840738	-0.111905	0.952643	-0.0492636	0.903379
ENSG00000065600	TMEM206	9.78125	21.0626	7.9182	8.81207	0.922801	0.0562965	0.928775	0.120388	0.740297	0.0225126	0.12385	1.09291	-0.124493	1.2174	-0.248342	0.969063
ENSG00000065613	SLK	25.3861	19.0312	23.9317	17.7684	0.225503	0.903118	0.18852	0.449926	0.956501	0.502641	0.470248	0.0893351	0.391521	-0.302186	-0.078727	-0.380913
ENSG00000065615	CYB5R4	7.55923	13.288	7.74111	5.92156	0.356616	0.00176087	0.278565	0.111548	0.981418	0.135625	0.27111	0.948543	0.298302	0.650242	0.0271918	0.677433
ENSG00000065618	COL17A1	0.162619	0.26979	0.179933	0.697693	0.153915	0.505907	0.272278	1	1	1	-0.318947	-0.249167	-0.307442	0.058275	0.0115043	0.0697793
ENSG00000065665	SEC61A2	8.11348	15.4508	6.44432	6.06438	0.867655	0.463303	0.983254	0.731835	0.920474	0.515922	0.326644	1.11366	0.0664176	1.04724	-0.260226	0.787014
ENSG00000065717	TLE2	72.9317	58.1717	69.6156	65.3466	0.830333	0.808501	0.934844	0.451115	0.961123	0.609199	0.153971	-0.16252	0.0886688	-0.251189	-0.0653023	-0.316491
ENSG00000065802	ASB1	12.5584	20.3177	15.2279	10.9585	0.908067	0.292236	0.515922	0.480552	0.782967	0.720731	0.167953	0.78429	0.410848	0.373442	0.242895	0.616337
ENSG00000065809	FAM107B	81.5064	54.0038	90.2363	63.9909	0.440532	0.78778	0.179879	0.210994	0.857745	0.0806338	0.33962	-0.236742	0.483068	-0.71981	0.143448	-0.576362
ENSG00000065833	ME1	20.7206	11.0783	21.536	10.1479	0.00176087	0.878906	0.00176087	0.00176087	0.954356	0.00176087	0.903294	0.106468	0.954162	-0.847694	0.0508682	-0.796826
ENSG00000065882	TBC1D1	33.4793	18.3471	31.7571	20.3204	0.0672847	0.92542	0.12565	0.0134839	0.966551	0.0346294	0.668615	-0.13354	0.596828	-0.730368	-0.0717866	-0.802154
ENSG00000065883	CDK13	13.3759	17.1976	13.7727	12.0371	0.689579	0.488364	0.545417	0.63969	0.964126	0.683798	0.131426	0.451681	0.168185	0.283496	0.0367588	0.320255
ENSG00000065911	MTHFD2	123.659	144.795	120.24	124.829	0.993006	0.792444	0.977611	0.79386	0.984129	0.689048	-0.0133707	0.210918	-0.0531682	0.264086	-0.0397976	0.224289
ENSG00000065923	SLC9A7	0.436425	0.728699	0.294572	0.328299	0.96139	0.791856	0.986229	0.880519	0.920659	0.688432	0.0654895	0.228937	-0.0210513	0.249988	-0.0865407	0.163447
ENSG00000065970	FOXJ2	11.862	13.821	9.60351	12.4423	0.964328	0.918952	0.397303	0.85771	0.577395	0.542571	-0.0591651	0.13154	-0.315739	0.44728	-0.256574	0.190705
ENSG00000065978	YBX1	1693.64	1522.59	1733.82	1686.92	0.992541	0.593374	0.955073	0.569501	0.96516	0.420766	0.00572891	-0.14768	0.0395164	-0.187196	0.0337874	-0.153409
ENSG00000065989	PDE4A	7.60356	6.42095	7.40691	6.43693	0.895195	0.998396	0.929559	0.903192	0.989159	0.933862	0.186851	-0.00273513	0.157003	-0.159738	-0.0298484	-0.189586
ENSG00000066027	PPP2R5A	24.3971	44.3901	25.1308	28.2649	0.423979	0.511117	0.583721	0.350519	0.961635	0.383625	-0.197266	0.616171	-0.157714	0.773885	0.0395521	0.813438
ENSG00000066044	ELAVL1	93.1191	90.2494	96.7475	91.5886	0.982063	0.984379	0.902983	0.965402	0.947819	0.866468	0.0234023	-0.0207933	0.0774114	-0.0982047	0.0540092	-0.0441955
ENSG00000066084	DIP2B	16.6369	17.2424	17.1113	15.3474	0.816068	0.688196	0.695612	0.955099	0.966077	0.990826	0.103442	0.149569	0.139706	0.00986283	0.036264	0.0461268
ENSG00000066117	SMARCD1	161.679	283.597	168.834	238.997	0.120709	0.79434	0.23631	0.0684135	0.973554	0.110242	-0.558146	0.244966	-0.49642	0.741386	0.0617259	0.803112
ENSG00000066135	KDM4A	21.2881	27.182	17.92	30.1204	0.562428	0.879819	0.191181	0.667133	0.876998	0.277244	-0.463897	-0.138411	-0.689272	0.550861	-0.225375	0.325486
ENSG00000066136	NFYC	61.5236	55.0953	74.3608	59.3453	0.976274	0.930675	0.625404	0.826952	0.66881	0.352055	0.0503399	-0.103581	0.315879	-0.41946	0.26554	-0.153921
ENSG00000066248	NGEF	13.8924	19.4168	12.5499	16.8589	0.909615	0.957331	0.807056	0.767295	0.964763	0.649543	-0.246909	0.183497	-0.374236	0.557734	-0.127328	0.430406
ENSG00000066279	ASPM	14.19	10.2886	13.3798	10.6043	0.0272824	0.970351	0.121132	0.0353284	0.872638	0.107511	0.361187	-0.0365954	0.287121	-0.323716	-0.0740662	-0.397782
ENSG00000066322	ELOVL1	124.035	126.886	126.892	115.813	0.840757	0.815037	0.73198	0.978474	0.973586	0.999867	0.0973257	0.129597	0.129664	-6.71599e-05	0.0323383	0.0322711
ENSG00000066379	ZNRD1	71.5472	65.0631	73.6566	69.2409	0.964856	0.908678	0.898219	0.803358	0.970653	0.690578	0.0459647	-0.0871866	0.0867602	-0.173947	0.0407955	-0.133151
ENSG00000066422	ZBTB11	4.66777	8.45028	4.58657	7.05082	0.00176087	0.336429	0.00704704	0.00176087	0.985622	0.00176087	-0.440844	0.207421	-0.458521	0.665942	-0.017677	0.648265
ENSG00000066427	ATXN3	8.20446	5.68779	7.01517	7.56625	0.973159	0.83078	0.975614	0.707596	0.909615	0.886672	0.0931744	-0.315385	-0.0855988	-0.229786	-0.178773	-0.408559
ENSG00000066455	GOLGA5	7.37169	7.9163	6.17339	7.54987	0.979507	0.949194	0.430584	0.897076	0.526754	0.252944	-0.0271719	0.0543208	-0.224547	0.278867	-0.197375	0.0814927
ENSG00000066468	FGFR2	0.202326	0.172909	0.47309	0.542166	0.102516	0.521029	0.964922	1	0.29686	0.583204	-0.20703	-0.22643	-0.0397435	-0.186687	0.167287	-0.0194003
ENSG00000066557	LRRC40	17.584	17.3517	17.6783	16.8727	0.945005	0.96989	0.933572	0.985622	0.992487	0.980293	0.0533746	0.0361595	0.0603048	-0.0241453	0.00693013	-0.0172152
ENSG00000066583	ISOC1	31.5489	24.1446	28.7451	28.4691	0.86602	0.713485	0.992092	0.381446	0.882106	0.680879	0.138919	-0.220834	0.0130096	-0.233844	-0.125909	-0.359752
ENSG00000066629	EML1	19.0936	13.206	19.7401	12.3446	0.407337	0.97736	0.341275	0.576875	0.983975	0.516584	0.556298	0.084133	0.599851	-0.515718	0.0435532	-0.472165
ENSG00000066651	TRMT11	20.4406	19.6248	18.2541	28.7087	0.92844	0.88854	0.866585	0.991807	0.981418	0.986197	-0.452536	-0.505961	-0.600433	0.0944728	-0.147897	-0.0534245
ENSG00000066654	THUMPD1	12.1553	9.21393	11.5789	6.52013	0.00176087	0.225776	0.00176087	0.363303	0.958719	0.580886	0.732395	0.396345	0.672419	-0.276075	-0.0599757	-0.33605
ENSG00000066697	MSANTD3	42.0241	61.3291	44.7696	47.7311	0.690996	0.615898	0.912733	0.404296	0.915119	0.509344	-0.175855	0.34872	-0.0885773	0.437297	0.0872776	0.524575
ENSG00000066735	KIF26A	11.7889	14.4062	11.549	14.6775	0.0942448	0.978421	0.055704	0.169805	0.976274	0.0956105	-0.274396	-0.0236619	-0.299717	0.276055	-0.025321	0.250734
ENSG00000066739	ATG2B	0.947507	6.12138	0.912404	3.20036	0.0302512	0.725283	0.00458804	0.30123	0.989159	0.281151	-0.819116	0.643113	-0.836401	1.47951	-0.0172847	1.46223
ENSG00000066777	ARFGEF1	11.5649	20.2251	13.732	11.866	0.992648	0.769699	0.967951	0.757185	0.959939	0.877665	-0.0316733	0.680638	0.18215	0.498488	0.213824	0.712311
ENSG00000066827	ZFAT	7.16522	8.28857	6.82172	8.20537	0.901185	0.993827	0.850671	0.898977	0.978474	0.851385	-0.155087	0.011714	-0.210197	0.221911	-0.0551095	0.166801
ENSG00000066855	MTFR1	70.4256	80.8429	62.1163	61.8693	0.812832	0.512821	0.996071	0.850767	0.853633	0.58929	0.181377	0.375255	0.00556853	0.369687	-0.175809	0.193878
ENSG00000066926	FECH	20.9639	30.4131	22.1325	23.8062	0.88246	0.683198	0.951616	0.372659	0.967415	0.475616	-0.16835	0.328859	-0.0967403	0.4256	0.0716097	0.497209
ENSG00000066933	MYO9A	7.88507	18.9231	7.38594	6.80345	0.892998	0.619242	0.965695	0.661422	0.972818	0.642925	0.167182	1.24896	0.0924322	1.15652	-0.0747499	1.08177
ENSG00000067057	PFKP	280.409	133.168	281.271	156.26	0.0134839	0.865951	0.0144433	0.0346294	0.996836	0.0332405	0.835489	-0.227543	0.839886	-1.06743	0.00439685	-1.06303
ENSG00000067064	IDI1	26.835	26.867	24.1792	32.1266	0.796924	0.759844	0.57581	0.998844	0.934563	0.91739	-0.243076	-0.241476	-0.382476	0.141	-0.1394	0.00160016
ENSG00000067066	SP100	17.8723	29.8376	21.3221	18.2678	0.991523	0.682874	0.941885	0.615407	0.909181	0.824372	-0.0284306	0.651542	0.202508	0.449034	0.230939	0.679973
ENSG00000067082	KLF6	7.07814	8.13665	13.8793	4.91972	0.41365	0.366692	0.00176087	0.920669	0.0104001	0.303232	0.391683	0.550795	1.19836	-0.647566	0.806679	0.159112
ENSG00000067113	PPAP2A	13.6429	15.4021	18.2091	9.73931	0.699929	0.761393	0.307434	0.966312	0.753107	0.952353	0.41416	0.567914	0.783657	-0.215744	0.369497	0.153753
ENSG00000067141	NEO1	0.490875	0.729273	0.556214	1.23664	0.598434	0.893966	0.627424	0.933014	0.978474	0.955255	-0.377844	-0.24598	-0.340488	0.0945081	0.037356	0.131864
ENSG00000067167	TRAM1	191.768	216.187	196.498	194.843	0.984996	0.794075	0.991027	0.727875	0.978108	0.806485	-0.0227151	0.14852	0.0120791	0.136441	0.0347941	0.171235
ENSG00000067177	PHKA1	8.42627	7.96243	8.75394	7.37182	0.621506	0.855878	0.435181	0.914103	0.955255	0.782321	0.153822	0.0881684	0.198464	-0.110296	0.0446422	-0.0656535
ENSG00000067182	TNFRSF1A	301.632	280.743	321.109	229.558	0.323167	0.773831	0.162631	0.958719	0.943467	0.887152	0.39095	0.288118	0.480647	-0.19253	0.0896971	-0.102833
ENSG00000067208	EVI5	3.95757	1.92562	2.13259	2.53009	0.765502	0.900087	0.932252	0.438675	0.42774	0.965786	0.395184	-0.206619	-0.132493	-0.0741257	-0.527678	-0.601803
ENSG00000067221	STOML1	2.85102	6.38164	2.46593	6.68199	0.203305	0.981782	0.0649905	0.241367	0.960668	0.0923632	-0.839738	-0.0507932	-0.959065	0.908272	-0.119327	0.788944
ENSG00000067225	PKM	3531.97	3173.6	3631.62	3373.71	0.95461	0.927732	0.904655	0.784645	0.976794	0.706738	0.0660988	-0.0881618	0.106217	-0.194378	0.0401178	-0.154261
ENSG00000067248	DHX29	23.7932	18.3725	21.2719	20.5004	0.721524	0.773192	0.966401	0.456334	0.860172	0.708008	0.19704	-0.143328	0.0486384	-0.191966	-0.148402	-0.340368
ENSG00000067334	DNTTIP2	152.677	131.011	159.794	104.819	0.0848972	0.612163	0.0386801	0.756223	0.959901	0.626944	0.53409	0.316377	0.59899	-0.282613	0.0648994	-0.217713
ENSG00000067365	METTL22	12.3482	12.6793	9.33525	13.338	0.973213	0.983143	0.628985	0.990826	0.792494	0.78284	-0.0962406	-0.0633272	-0.436294	0.372967	-0.340054	0.0329134
ENSG00000067369	TP53BP1	21.6231	52.1333	23.0373	30.6283	0.628631	0.381889	0.753919	0.0346294	0.978629	0.102962	-0.465926	0.730393	-0.382045	1.11244	0.0838807	1.19632
ENSG00000067533	RRP15	53.2021	36.7217	51.3681	41.284	0.697502	0.943512	0.750595	0.586577	0.982869	0.628864	0.350889	-0.160692	0.302144	-0.462835	-0.0487455	-0.511581
ENSG00000067560	RHOA	340.279	298.064	351.697	322.899	0.88723	0.790308	0.740743	0.528844	0.950897	0.353952	0.0751815	-0.114721	0.122523	-0.237244	0.0473412	-0.189903
ENSG00000067596	DHX8	33.6389	40.5735	37.4084	34.9489	0.976794	0.880235	0.952027	0.779911	0.867816	0.950897	-0.0520786	0.204424	0.0929718	0.111453	0.14505	0.256503
ENSG00000067601	PMS2P4	4.987	20.2363	7.05081	6.86735	0.88723	0.465036	0.992487	0.298756	0.86602	0.471274	-0.34383	1.32634	0.0295439	1.2968	0.373374	1.67017
ENSG00000067606	PRKCZ	9.2158	24.9786	10.9317	13.2038	0.325168	0.37463	0.796451	0.0712334	0.86131	0.188762	-0.438899	0.827384	-0.23352	1.0609	0.205379	1.26628
ENSG00000067704	IARS2	94.9432	96.3016	96.6974	83.4252	0.743714	0.750556	0.681608	0.990092	0.986234	0.995738	0.182478	0.202553	0.20835	-0.00579718	0.0258724	0.0200752
ENSG00000067798	NAV3	0.0712051	0.0739341	0.24626	0.530734	0.0198035	0.683089	0.587262	1	1	1	-0.289085	-0.287186	-0.172031	-0.115155	0.117055	0.00189963
ENSG00000067829	IDH3G	112.476	236.73	115.276	76.5324	0.0241497	0.552023	0.0134839	0.688356	0.979492	0.693338	0.543685	1.60402	0.578548	1.02547	0.0348626	1.06033
ENSG00000067836	ROGDI	27.4252	33.1298	30.8915	40.9007	0.493972	0.798071	0.713055	0.821932	0.931885	0.966077	-0.543949	-0.288306	-0.383286	0.0949806	0.160663	0.255643
ENSG00000067900	ROCK1	11.4338	10.3921	10.8567	9.67883	0.508683	0.876216	0.674292	0.839997	0.938504	0.952428	0.201972	0.0855249	0.138625	-0.0530997	-0.0633471	-0.116447
ENSG00000067955	CBFB	56.4532	59.4883	59.7332	59.5432	0.973502	0.999347	0.997207	0.969634	0.961961	0.996311	-0.0743175	-0.00128754	0.00444712	-0.00573466	0.0787646	0.0730299
ENSG00000067992	PDK3	1.42144	2.32048	1.69116	1.91375	0.689503	0.81318	0.929395	0.316378	0.889045	0.61388	-0.193948	0.14264	-0.0844773	0.227117	0.109471	0.336588
ENSG00000068001	HYAL2	53.746	53.3228	44.7655	34.3512	0.644859	0.766599	0.890397	0.996889	0.943826	0.96516	0.616865	0.605871	0.363442	0.24243	-0.253424	-0.0109941
ENSG00000068024	HDAC4	25.1923	48.8858	23.8867	20.6857	0.94001	0.625935	0.962788	0.719254	0.986234	0.690552	0.261415	1.16548	0.190428	0.975052	-0.0709871	0.904065
ENSG00000068028	RASSF1	5.39967	9.65345	3.66457	9.4085	0.00324853	0.980359	0.00176087	0.00176087	0.209934	0.00176087	-0.624576	0.030648	-1.01007	1.04072	-0.385494	0.655224
ENSG00000068078	FGFR3	7.46036	9.56902	6.85135	6.58519	0.970344	0.767701	0.98787	0.9266	0.978474	0.790182	0.140045	0.430345	0.0440474	0.386297	-0.0959976	0.2903
ENSG00000068079	IFI35	42.1254	62.6871	46.509	41.2853	0.99007	0.414196	0.90664	0.431396	0.928646	0.59977	0.0277322	0.579601	0.164375	0.415226	0.136643	0.551869
ENSG00000068097	HEATR6	9.42695	19.7549	8.14179	9.41853	0.999347	0.425197	0.918227	0.422308	0.901642	0.300426	0.00106345	0.929963	-0.171065	1.10103	-0.172128	0.9289
ENSG00000068120	COASY	198.679	363.773	210	314.834	0.00458804	0.813086	0.0198035	0.0406367	0.938635	0.0867002	-0.658838	0.207221	-0.579663	0.786884	0.0791746	0.866059
ENSG00000068137	PLEKHH3	13.1995	26.116	12.5562	8.43177	0.0839949	0.301306	0.179556	0.604724	0.970257	0.569666	0.54304	1.43041	0.48065	0.949758	-0.0623901	0.887367
ENSG00000068305	MEF2A	11.0428	18.7208	12.3483	11.5696	0.978474	0.650203	0.972316	0.60853	0.933515	0.722796	-0.0571246	0.610702	0.0805016	0.5302	0.137626	0.667826
ENSG00000068308	OTUD5	82.2158	72.2072	82.9262	72.013	0.512671	0.995956	0.444145	0.674428	0.98902	0.630622	0.186312	0.00378048	0.198431	-0.194651	0.0121188	-0.182532
ENSG00000068323	TFE3	41.8056	53.0042	43.4951	46.1007	0.721852	0.708008	0.893564	0.410598	0.947751	0.549542	-0.134943	0.193484	-0.0803467	0.273831	0.0545959	0.328426
ENSG00000068354	TBC1D25	22.2703	21.6394	22.662	22.1068	0.993784	0.98822	0.984967	0.984381	0.988951	0.976767	0.00975178	-0.0282467	0.0328496	-0.0610964	0.0230979	-0.0379985
ENSG00000068366	ACSL4	47.1251	38.865	50.0188	35.0544	0.417232	0.906859	0.268684	0.701902	0.957383	0.548462	0.406815	0.141221	0.489388	-0.348167	0.0825728	-0.265595
ENSG00000068383	INPP5A	42.0714	32.0798	48.7172	34.0469	0.771274	0.978474	0.460049	0.75136	0.866413	0.5308	0.289968	-0.0809583	0.4926	-0.573558	0.202632	-0.370926
ENSG00000068394	GPKOW	42.1269	45.8753	44.215	46.9485	0.650925	0.973213	0.874028	0.7634	0.916378	0.946561	-0.149606	-0.0319831	-0.0829035	0.0509203	0.0667028	0.117623
ENSG00000068400	GRIPAP1	24.4282	26.7295	24.9326	26.9555	0.738672	0.989432	0.818363	0.750556	0.976871	0.834847	-0.131759	-0.0113045	-0.104484	0.0931794	0.0272753	0.120455
ENSG00000068438	FTSJ1	161.217	141.408	164.456	156.937	0.97629	0.842651	0.943307	0.770198	0.981382	0.707808	0.0383363	-0.14833	0.0666859	-0.215015	0.0283495	-0.186666
ENSG00000068489	PRR11	30.3887	21.8959	32.1343	27.0624	0.847892	0.627259	0.692136	0.208959	0.947458	0.0905805	0.156337	-0.282391	0.232068	-0.514459	0.0757316	-0.438727
ENSG00000068615	REEP1	7.83045	7.41382	9.62124	7.64493	0.989142	0.987513	0.80331	0.978421	0.835568	0.75927	0.0274867	-0.0349905	0.268921	-0.303912	0.241435	-0.0624772
ENSG00000068650	ATP11A	31.1544	41.7842	40.8038	35.3172	0.95877	0.920989	0.950357	0.771383	0.836736	0.990709	-0.17064	0.23057	0.197898	0.0326715	0.368539	0.40121
ENSG00000068654	POLR1A	66.514	103.974	55.3417	61.3496	0.974144	0.702118	0.964318	0.778785	0.910297	0.636811	0.113063	0.742303	-0.143751	0.886054	-0.256814	0.62924
ENSG00000068697	LAPTM4A	141.627	157.491	141.332	160.139	0.764262	0.987128	0.768029	0.854089	0.997207	0.860735	-0.174904	-0.0237561	-0.17787	0.154114	-0.00296624	0.151148
ENSG00000068724	TTC7A	17.5538	15.0901	15.6667	17.5803	0.999174	0.943554	0.963488	0.943326	0.963688	0.988034	-0.00195387	-0.196242	-0.14837	-0.0478717	-0.146416	-0.194288
ENSG00000068745	IP6K2	33.3256	41.8904	37.5295	40.3149	0.605627	0.976667	0.933322	0.551554	0.829675	0.880668	-0.260452	0.0527397	-0.0982361	0.150976	0.162216	0.313191
ENSG00000068784	SRBD1	6.86717	4.53206	5.88386	4.66944	0.411032	0.982307	0.467619	0.416003	0.812832	0.514272	0.410908	-0.0300276	0.241337	-0.271364	-0.169572	-0.440936
ENSG00000068793	CYFIP1	60.807	64.7654	70.0101	58.6627	0.98348	0.961854	0.862093	0.977469	0.902744	0.9751	0.0501156	0.138291	0.24739	-0.109099	0.197274	0.0881753
ENSG00000068796	KIF2A	75.2448	33.432	72.9143	36.0776	0.618732	0.981565	0.588282	0.500375	0.991695	0.468035	1.0205	-0.10389	0.976299	-1.08019	-0.0441967	-1.12438
ENSG00000068878	PSME4	31.6338	28.891	29.8893	25.4678	0.267902	0.765179	0.553409	0.863456	0.922702	0.97368	0.29217	0.169445	0.215331	-0.0458859	-0.0768394	-0.122725
ENSG00000068885	IFT80	4.84193	14.3273	6.98953	4.49316	0.978474	0.400667	0.71411	0.445247	0.808925	0.703068	0.0754826	1.33029	0.469325	0.860969	0.393842	1.25481
ENSG00000068903	SIRT2	13.1282	10.6762	14.073	12.9866	0.991549	0.685757	0.924516	0.615992	0.932036	0.41586	0.0135672	-0.241551	0.100966	-0.342517	0.0873989	-0.255118
ENSG00000068912	ERLEC1	21.0091	19.7532	20.3465	20.3854	0.976767	0.977944	0.997169	0.948873	0.973798	0.978474	0.0396465	-0.0413305	-0.00250921	-0.0388212	-0.0421557	-0.0809769
ENSG00000068971	PPP2R5B	2.60223	0.350923	1.86726	2.0551	0.964318	0.411537	0.981418	0.354056	0.885427	0.409197	0.182596	-0.78651	-0.0684257	-0.718084	-0.251021	-0.969106
ENSG00000068985	PAGE1	38.8193	27.2747	41.3048	42.374	0.875226	0.0325417	0.97978	0.132021	0.93308	0.0496622	-0.120463	-0.60006	-0.0351877	-0.564873	0.0852755	-0.479597
ENSG00000069011	PITX1	119.732	56.6656	119.192	63.4336	0.00176087	0.89661	0.00176087	0.00704704	0.99476	0.00931705	0.895605	-0.157517	0.889191	-1.04671	-0.00641399	-1.05312
ENSG00000069020	MAST4	3.00486	4.79116	6.24723	1.73213	0.367797	0.072309	0.00176087	0.687655	0.170706	0.826725	0.42333	0.863659	1.14391	-0.280252	0.72058	0.440328
ENSG00000069248	NUP133	41.8505	57.9081	40.3957	44.9684	0.925172	0.509017	0.82107	0.31594	0.972338	0.221805	-0.0990972	0.351061	-0.147773	0.498833	-0.0486753	0.450158
ENSG00000069275	NUCKS1	952.924	921.149	964.204	1092.16	0.9758	0.966635	0.977469	0.992813	0.996629	0.991016	-0.196366	-0.245188	-0.179424	-0.0657643	0.0169419	-0.0488224
ENSG00000069329	VPS35	181.139	186.16	190.774	184.662	0.988776	0.993509	0.981782	0.985341	0.972004	0.986234	-0.0274892	0.0115317	0.0464822	-0.0349505	0.0739714	0.0390209
ENSG00000069345	DNAJA2	53.6959	62.6855	56.5182	54.7919	0.976794	0.522887	0.958812	0.40606	0.902905	0.69153	-0.028114	0.187757	0.0432002	0.144557	0.0713143	0.215871
ENSG00000069399	BCL3	29.4059	114.556	174.118	21.9359	0.569501	0.00176087	0.00176087	0.00176087	0.00176087	0.464724	0.39186	2.28378	2.87929	-0.595519	2.48743	1.89192
ENSG00000069424	KCNAB2	17.7645	35.601	15.771	17.725	0.997063	0.607586	0.799107	0.608889	0.801042	0.524255	0.00288616	0.930746	-0.1505	1.08125	-0.153387	0.92786
ENSG00000069482	GAL	71.2496	46.8825	74.9171	54.5479	0.0905805	0.571794	0.0279957	0.00176087	0.924816	0.00176087	0.373347	-0.210155	0.443831	-0.653986	0.0704835	-0.583503
ENSG00000069509	FUNDC1	17.4682	31.6478	17.5627	18.1496	0.969858	0.00176087	0.975036	0.00176087	0.994103	0.00176087	-0.0496317	0.739761	-0.0426457	0.782407	0.006986	0.789393
ENSG00000069535	MAOB	0.356006	0.142742	0.135441	0.209704	0.730463	1	1	0.702163	0.398543	1	0.0924901	-0.044395	-0.0493191	0.00492411	-0.141809	-0.136885
ENSG00000069702	TGFBR3	29.9815	10.0271	24.3504	16.7051	0.0325417	0.0694812	0.384447	0.00176087	0.739641	0.00176087	0.773806	-0.637143	0.494393	-1.13154	-0.279413	-1.41095
ENSG00000069812	HES2	4.40832	24.633	2.75981	3.77172	0.968137	0.416804	0.904119	0.481735	0.849719	0.262287	0.150945	2.20614	-0.278097	2.48424	-0.429042	2.0552
ENSG00000069849	ATP1B3	1630.94	2426.08	1643.21	1746.08	0.980339	0.77438	0.983527	0.666303	0.996822	0.7285	-0.0982994	0.474045	-0.0874995	0.561544	0.0108	0.572344
ENSG00000069869	NEDD4	15.4528	12.4681	19.7121	9.08812	0.0568633	0.422308	0.00458804	0.733998	0.675728	0.267311	0.654444	0.383861	0.969484	-0.585624	0.315041	-0.270583
ENSG00000069943	PIGB	12.1061	14.337	10.9627	13.3607	0.959293	0.971073	0.828904	0.888859	0.951422	0.677744	-0.122925	0.0888991	-0.244878	0.333777	-0.121953	0.211824
ENSG00000069956	MAPK6	33.7418	30.9492	35.7025	24.1365	0.263386	0.710608	0.14918	0.950257	0.959489	0.880221	0.451546	0.334177	0.528594	-0.194417	0.0770479	-0.117369
ENSG00000069966	GNB5	16.0626	17.2496	16.2283	15.765	0.986275	0.892396	0.978474	0.935086	0.991547	0.944492	0.0239679	0.115791	0.0371423	0.0786484	0.0131744	0.0918229
ENSG00000069974	RAB27A	13.1256	30.1517	12.3168	15.5474	0.883563	0.378768	0.791119	0.212366	0.976138	0.170147	-0.214265	0.873638	-0.293548	1.16719	-0.0792833	1.0879
ENSG00000069998	CECR5	27.9362	45.0247	29.4335	44.3653	0.00176087	0.983597	0.00176087	0.00176087	0.922858	0.00176087	-0.631154	0.0203733	-0.560743	0.581116	0.0704118	0.651528
ENSG00000070010	UFD1L	273.988	186.612	291.895	264.563	0.988034	0.788911	0.966127	0.74793	0.979008	0.663634	0.050129	-0.499055	0.140824	-0.639879	0.0906953	-0.549184
ENSG00000070018	LRP6	20.0833	16.5966	27.5991	14.0255	0.625891	0.904344	0.157395	0.871832	0.693164	0.382027	0.462586	0.21467	0.885184	-0.670514	0.422598	-0.247917
ENSG00000070047	PHRF1	17.3632	19.0585	17.2047	16.5261	0.909691	0.76021	0.936909	0.87786	0.988457	0.858083	0.0637582	0.184843	0.0519002	0.132943	-0.011858	0.121085
ENSG00000070061	IKBKAP	62.228	46.7563	55.3163	54.4398	0.919538	0.915567	0.991974	0.74447	0.933847	0.896801	0.186489	-0.211124	0.0222326	-0.233357	-0.164257	-0.397614
ENSG00000070081	NUCB2	43.5767	28.9342	39.8105	39.3793	0.928191	0.530564	0.991807	0.42736	0.937927	0.488163	0.139387	-0.419707	0.0149561	-0.434663	-0.124431	-0.559094
ENSG00000070087	PFN2	0.98129	0.594296	0.763233	0.372617	0.263386	0.732158	0.499743	0.753142	0.931184	0.92807	0.329457	0.128864	0.219878	-0.0910141	-0.10958	-0.200594
ENSG00000070159	PTPN3	6.35205	9.51267	5.8954	7.51583	0.60509	0.402849	0.324646	0.0508851	0.911314	0.0144433	-0.188199	0.274821	-0.269317	0.544138	-0.081118	0.46302
ENSG00000070190	DAPP1	0.222021	0.255633	0.828127	0.197661	1	1	0.02647	1	0.0359232	0.0910438	0.0159036	0.0375635	0.363878	-0.326315	0.347974	0.0216599
ENSG00000070214	SLC44A1	10.5925	10.4794	10.3194	8.56067	0.339947	0.409519	0.464469	0.989648	0.976879	0.986229	0.253863	0.240847	0.222231	0.0186166	-0.0316327	-0.0130162
ENSG00000070269	C14orf101	5.54464	3.04333	5.00226	5.03406	0.967415	0.497037	0.996629	0.295056	0.960361	0.457104	0.101094	-0.479981	-0.00653701	-0.473444	-0.107631	-0.581075
ENSG00000070366	SMG6	13.9217	19.4273	10.2541	21.6294	0.675289	0.976026	0.189134	0.857999	0.78016	0.527827	-0.569589	-0.141133	-0.947318	0.806186	-0.37773	0.428456
ENSG00000070367	EXOC5	19.2449	19.7637	22.2953	13.1959	0.31861	0.607379	0.063306	0.98902	0.843791	0.934844	0.483434	0.518242	0.676995	-0.158753	0.193561	0.0348073
ENSG00000070371	CLTCL1	9.9378	10.3721	8.98715	8.39846	0.631123	0.808443	0.904544	0.979008	0.826231	0.865609	0.199167	0.250721	0.0794473	0.171273	-0.11972	0.0515534
ENSG00000070388	FGF22	0.425802	0.147042	0.250146	0.614173	0.896899	0.643105	0.521708	0.733655	0.806634	1	-0.107893	-0.284004	-0.216336	-0.0676682	-0.108443	-0.176111
ENSG00000070404	FSTL3	252.892	115.892	260.889	120.99	0.00176087	0.90828	0.00176087	0.00176087	0.958787	0.00176087	1.05135	-0.0610752	1.09591	-1.15699	0.0445677	-1.11242
ENSG00000070413	DGCR2	14.467	21.8032	15.0333	25.2841	0.00931705	0.766447	0.02647	0.055704	0.970351	0.14327	-0.728483	-0.196905	-0.679702	0.482798	0.0487802	0.531578
ENSG00000070423	RNF126	87.4502	87.4747	95.5002	100.726	0.730737	0.739394	0.946423	0.999581	0.86602	0.87189	-0.199645	-0.19925	-0.0753243	-0.123925	0.12432	0.000395093
ENSG00000070444	MNT	12.9002	7.28242	9.34246	11.6703	0.964318	0.554591	0.857134	0.430746	0.7486	0.855015	0.124287	-0.558472	-0.269311	-0.289161	-0.393598	-0.682759
ENSG00000070476	ZXDC	8.11191	9.62414	7.66652	8.37174	0.974672	0.684173	0.857999	0.566834	0.934981	0.329028	-0.0366024	0.164466	-0.101589	0.266055	-0.064987	0.201068
ENSG00000070495	JMJD6	35.2837	28.4733	40.0994	27.8994	0.464469	0.982307	0.107893	0.376624	0.751903	0.0478315	0.318429	0.0274292	0.493683	-0.466254	0.175255	-0.290999
ENSG00000070501	POLB	26.7147	33.4918	24.3564	28.7595	0.934844	0.773192	0.731899	0.536907	0.896801	0.258443	-0.0992426	0.206454	-0.222879	0.429332	-0.123636	0.305696
ENSG00000070540	WIPI1	7.46371	6.48549	8.79143	7.54619	0.995758	0.960361	0.957241	0.967755	0.957099	0.877861	-0.0125192	-0.169927	0.176889	-0.346816	0.189408	-0.157408
ENSG00000070610	GBA2	14.4353	22.4019	13.1184	16.6001	0.955173	0.863262	0.880634	0.767613	0.9751	0.662296	-0.178513	0.391683	-0.299005	0.690688	-0.120492	0.570196
ENSG00000070614	NDST1	69.9782	64.1235	71.7005	62.6426	0.935603	0.989889	0.909691	0.959837	0.988988	0.9407	0.155075	0.0326779	0.189189	-0.156511	0.0341144	-0.122397
ENSG00000070669	ASNS	38.6494	54.5456	41.9149	56.2316	0.0114792	0.969892	0.0987371	0.0180295	0.862433	0.138397	-0.518568	-0.0423875	-0.407092	0.364704	0.111476	0.476181
ENSG00000070718	AP3M2	5.2378	3.31041	2.96518	6.07474	0.946561	0.48504	0.354056	0.598783	0.445854	0.969858	-0.157865	-0.604593	-0.70157	0.0969772	-0.543705	-0.446728
ENSG00000070729	CNGB1	0.695184	6.84116	1.42618	1.78143	0.471546	0.308036	0.942507	0.00176087	0.571011	0.142348	-0.488548	1.2253	-0.142331	1.36763	0.346217	1.71385
ENSG00000070756	PABPC1	4612.57	4285.48	4841.6	4299.31	0.868029	0.99594	0.679067	0.885325	0.931489	0.722085	0.10142	-0.00464617	0.171304	-0.17595	0.0698835	-0.106066
ENSG00000070759	TESK2	0.81942	3.89657	1.10308	1.09815	0.910917	0.562428	0.998241	0.448267	0.912094	0.571603	-0.136009	0.928469	0.0022939	0.926175	0.138302	1.06448
ENSG00000070761	C16orf80	63.7903	74.3264	64.5981	63.6174	0.996629	0.73072	0.98764	0.745678	0.989651	0.764607	0.00379646	0.218104	0.0214026	0.196701	0.0176061	0.214307
ENSG00000070770	CSNK2A2	44.1636	44.817	38.4307	42.3763	0.959837	0.9495	0.793033	0.989042	0.688586	0.733894	0.0569664	0.0772431	-0.134338	0.211581	-0.191305	0.0202768
ENSG00000070778	PTPN21	6.24239	6.42923	6.29482	7.97128	0.827365	0.816614	0.824143	0.986234	0.99532	0.989056	-0.274716	-0.242378	-0.265568	0.0231902	0.00914795	0.0323381
ENSG00000070785	EIF2B3	59.6866	41.1263	57.8264	47.2259	0.206512	0.627259	0.322955	0.0104001	0.967046	0.0171566	0.32554	-0.19085	0.281365	-0.472214	-0.0441749	-0.516389
ENSG00000070814	TCOF1	131.196	103.43	131.151	119.269	0.916398	0.812327	0.90522	0.577933	0.999581	0.55221	0.13534	-0.201925	0.134852	-0.336778	-0.000487494	-0.337265
ENSG00000070831	CDC42	116.979	181.935	113.12	125.08	0.908034	0.463303	0.826492	0.35609	0.970779	0.301306	-0.09503	0.533459	-0.142598	0.676058	-0.0475685	0.628489
ENSG00000070882	OSBPL3	12.0986	7.81318	16.8223	8.39752	0.425752	0.960197	0.072309	0.0761728	0.404419	0.0114792	0.439312	-0.0834468	0.856203	-0.93965	0.416891	-0.522759
ENSG00000070915	SLC12A3	14.8206	22.5303	13.4334	12.6955	0.768656	0.359472	0.964318	0.547919	0.902841	0.430067	0.194855	0.73919	0.0706815	0.668509	-0.124173	0.544336
ENSG00000070950	RAD18	16.5205	8.50652	21.5527	12.2677	0.539445	0.697892	0.07918	0.409372	0.586353	0.222614	0.37637	-0.441468	0.72314	-1.16461	0.346769	-0.817838
ENSG00000070961	ATP2B1	69.1639	73.0397	70.207	57.9582	0.794236	0.77786	0.734377	0.978474	0.990688	0.982287	0.247189	0.323697	0.268182	0.0555154	0.0209931	0.0765085
ENSG00000071051	NCK2	0.338297	0.453543	0.30407	0.167279	0.59977	0.423061	1	0.929129	0.980702	0.890567	0.109573	0.178982	0.0882997	0.090682	-0.0212736	0.0694084
ENSG00000071054	MAP4K4	61.8716	55.9412	61.1563	40.0108	0.00324853	0.506099	0.00176087	0.905243	0.988949	0.91816	0.604414	0.463829	0.588166	-0.124337	-0.0162479	-0.140585
ENSG00000071073	MGAT4A	3.52781	4.01422	3.40768	2.27914	0.8506	0.766269	0.793003	0.977944	0.990414	0.954643	0.369387	0.491057	0.337689	0.153368	-0.0316982	0.12167
ENSG00000071082	RPL31	3512.83	2324.13	3545.71	3005.64	0.50816	0.638402	0.456334	0.442006	0.989056	0.429259	0.224823	-0.3707	0.238256	-0.608956	0.0134332	-0.595523
ENSG00000071127	WDR1	568.048	581.867	568.082	560.73	0.993904	0.987652	0.993887	0.990414	0.999905	0.990414	0.0186405	0.0531969	0.0187266	0.0344703	8.60457e-05	0.0345564
ENSG00000071189	SNX13	10.1615	13.476	10.4267	12.0938	0.882106	0.952763	0.881125	0.82945	0.989159	0.803759	-0.212739	0.134972	-0.181617	0.316589	0.031122	0.347711
ENSG00000071205	ARHGAP10	9.4502	5.70485	9.97298	7.04896	0.123747	0.434815	0.0459494	0.00176087	0.938635	0.00176087	0.339549	-0.231985	0.403958	-0.635943	0.0644095	-0.571534
ENSG00000071243	ING3	5.8871	9.33594	6.94905	7.14206	0.736304	0.57671	0.985622	0.107893	0.805648	0.518421	-0.213024	0.310313	-0.0307847	0.341098	0.18224	0.523337
ENSG00000071462	WBSCR22	238.967	232.001	259.5	249.61	0.953745	0.874741	0.959293	0.972366	0.860982	0.740458	-0.0623537	-0.104675	0.0556217	-0.160296	0.117975	-0.0423209
ENSG00000071537	SEL1L	8.28348	21.2924	9.32407	8.46176	0.992074	0.577783	0.964318	0.571249	0.958531	0.619136	-0.024797	1.15473	0.114267	1.04047	0.139064	1.17953
ENSG00000071539	TRIP13	239.821	198.398	242.026	180.444	0.760723	0.956302	0.695686	0.862372	0.994716	0.809715	0.406486	0.135414	0.419581	-0.284167	0.0130953	-0.271071
ENSG00000071553	ATP6AP1	63.8797	67.0495	68.5151	70.5533	0.696129	0.912083	0.96516	0.918779	0.844159	0.976923	-0.139207	-0.0714103	-0.041109	-0.0303013	0.0980982	0.067797
ENSG00000071564	TCF3	187.887	230.61	198.959	153.4	0.760507	0.610177	0.628042	0.849719	0.968201	0.915099	0.289155	0.581927	0.370915	0.211012	0.0817601	0.292772
ENSG00000071626	DAZAP1	457.093	431.895	440.945	376.907	0.580394	0.781159	0.711664	0.950479	0.974008	0.984967	0.276943	0.195502	0.225284	-0.0297816	-0.0516589	-0.0814405
ENSG00000071655	MBD3	57.758	80.1733	57.8291	88.5517	0.00458804	0.831793	0.0587121	0.186845	0.99845	0.281457	-0.59961	-0.140072	-0.597894	0.457822	0.0017155	0.459538
ENSG00000071794	HLTF	18.119	15.9317	18.2159	16.3386	0.851553	0.978474	0.786923	0.817135	0.994368	0.73643	0.133675	-0.0323712	0.140607	-0.172978	0.00693183	-0.166046
ENSG00000071859	FAM50A	113.445	96.4305	127.85	108.271	0.982063	0.945263	0.9028	0.900123	0.946258	0.750654	0.0661523	-0.163876	0.235793	-0.399669	0.16964	-0.230028
ENSG00000071889	FAM3A	53.6633	56.9585	55.1826	58.5802	0.803358	0.970281	0.903096	0.908034	0.974008	0.966778	-0.12212	-0.0391465	-0.0832701	0.0441236	0.0388498	0.0829734
ENSG00000071894	CPSF1	59.4713	73.9338	70.8749	79.8848	0.459531	0.94838	0.869759	0.657627	0.730958	0.974686	-0.413683	-0.108853	-0.168174	0.0593202	0.245509	0.304829
ENSG00000071967	CYBRD1	7.92969	5.10195	6.85928	6.20714	0.696963	0.880524	0.94001	0.542392	0.870335	0.745781	0.274869	-0.208664	0.11031	-0.318974	-0.164559	-0.483533
ENSG00000071994	PDCD2	81.3331	93.7492	87.2757	104.855	0.0777019	0.693041	0.323326	0.563024	0.863573	0.865964	-0.358693	-0.158322	-0.259315	0.100993	0.0993779	0.200371
ENSG00000072042	RDH11	44.1717	80.3993	48.2151	66.2949	0.342791	0.864371	0.519672	0.315721	0.952633	0.435694	-0.564769	0.270854	-0.443657	0.714511	0.121112	0.835623
ENSG00000072062	PRKACA	39.3939	38.0629	36.0373	38.936	0.98816	0.982307	0.863946	0.974619	0.82496	0.952425	0.016048	-0.0311033	-0.105955	0.074852	-0.122003	-0.0471513
ENSG00000072071	LPHN1	12.705	17.7444	12.071	9.45384	0.598434	0.685675	0.721905	0.813038	0.977446	0.792854	0.360475	0.785612	0.296894	0.488719	-0.0635819	0.425137
ENSG00000072110	ACTN1	162.925	163.135	186.41	126.868	0.281151	0.396369	0.0295439	0.998212	0.740297	0.787977	0.355916	0.357752	0.547981	-0.19023	0.192065	0.00183582
ENSG00000072121	ZFYVE26	6.45823	9.83946	8.65717	13.3687	0.559386	0.845158	0.846338	0.671195	0.893204	0.962061	-0.861567	-0.376392	-0.528171	0.151779	0.333397	0.485176
ENSG00000072134	EPN2	21.733	60.2745	31.2652	14.4515	0.834516	0.193182	0.50994	0.459876	0.858083	0.708919	0.528675	1.92042	1.01579	0.904628	0.487119	1.39175
ENSG00000072135	PTPN18	9.4095	34.4031	10.5586	16.8208	0.130386	0.540241	0.283151	0.104291	0.925172	0.185371	-0.722092	0.951733	-0.583652	1.53539	0.13844	1.67383
ENSG00000072163	LIMS2	7.6648	4.88349	6.45272	3.64127	0.07918	0.814017	0.248152	0.517278	0.799439	0.745124	0.77672	0.28712	0.583396	-0.296275	-0.193324	-0.4896
ENSG00000072195	SPEG	3.08893	2.83532	4.06682	6.65979	0.377725	0.509017	0.715064	0.980331	0.868928	0.864544	-0.76697	-0.840721	-0.513392	-0.327329	0.253578	-0.073751
ENSG00000072210	ALDH3A2	105.854	53.5509	117.112	79.4366	0.50795	0.558492	0.187284	0.22048	0.91167	0.137133	0.40533	-0.551867	0.54857	-1.10044	0.143239	-0.957197
ENSG00000072274	TFRC	152.344	130.354	158.967	48.9152	0.00176087	0.245749	0.00176087	0.880235	0.959076	0.823425	1.59998	1.37823	1.6606	-0.282363	0.0606155	-0.221748
ENSG00000072310	SREBF1	137.217	115.56	145.375	99.7264	0.468035	0.864544	0.413417	0.810599	0.971815	0.731016	0.452641	0.208703	0.534798	-0.326095	0.0821564	-0.243938
ENSG00000072364	AFF4	20.8661	45.131	25.408	6.54948	0.00176087	0.0365309	0.00176087	0.644859	0.8506	0.722796	1.4193	2.46277	1.68069	0.782079	0.261387	1.04347
ENSG00000072401	UBE2D1	11.4489	12.053	10.1559	11.893	0.969858	0.988987	0.670797	0.952633	0.805008	0.62568	-0.04687	0.01652	-0.192701	0.209221	-0.145831	0.06339
ENSG00000072415	MPP5	14.785	13.2298	12.7417	16.5204	0.901848	0.74559	0.6556	0.937815	0.889317	0.984907	-0.141943	-0.282218	-0.329212	0.0469941	-0.18727	-0.140276
ENSG00000072422	RHOBTB1	7.6399	10.3612	6.90599	12.0499	0.0951374	0.742595	0.0734495	0.250306	0.887125	0.202256	-0.54347	-0.184741	-0.657712	0.472971	-0.114242	0.358729
ENSG00000072501	SMC1A	176.488	175.159	181.678	167.012	0.946561	0.96272	0.889319	0.992541	0.977121	0.973586	0.0787014	0.0679191	0.120053	-0.0521341	0.0413518	-0.0107823
ENSG00000072506	HSD17B10	287.973	291.736	283.756	254.086	0.490091	0.700339	0.593265	0.987608	0.98152	0.975707	0.17929	0.197892	0.158155	0.0397363	-0.0211348	0.0186015
ENSG00000072518	MARK2	13.4845	19.8571	16.3912	15.0481	0.824193	0.692791	0.906106	0.553822	0.615184	0.827408	-0.138786	0.358491	0.109405	0.249086	0.248191	0.497277
ENSG00000072571	HMMR	17.2886	20.6648	19.6807	20.7023	0.692136	0.998048	0.965705	0.766468	0.807056	0.972475	-0.23509	-0.00238504	-0.0664271	0.0640421	0.168663	0.232705
ENSG00000072682	P4HA2	23.6236	50.6115	25.1851	21.7479	0.931834	0.443654	0.78887	0.506375	0.961854	0.553169	0.109673	1.14758	0.195016	0.952562	0.085343	1.03791
ENSG00000072736	NFATC3	26.3502	11.2861	25.0928	14.4864	0.175533	0.864335	0.238754	0.211578	0.977944	0.242195	0.782083	-0.311359	0.716633	-1.02799	-0.0654494	-1.09344
ENSG00000072756	TRNT1	14.302	10.817	11.3886	12.9496	0.967031	0.849719	0.919766	0.731016	0.807056	0.974744	0.124942	-0.222048	-0.159102	-0.0629465	-0.284044	-0.34699
ENSG00000072778	ACADVL	382.36	572.595	392.695	407.343	0.941916	0.569454	0.975707	0.47371	0.98152	0.51673	-0.090852	0.489235	-0.052572	0.541807	0.03828	0.580087
ENSG00000072786	STK10	22.1652	16.0545	22.2495	16.1833	0.0386801	0.991807	0.0295439	0.0959777	0.994224	0.0848972	0.410317	-0.0102556	0.415341	-0.425597	0.00502407	-0.420572
ENSG00000072803	FBXW11	25.9123	20.9335	23.5259	16.063	0.0134839	0.218819	0.0919062	0.489764	0.877523	0.788489	0.627863	0.344419	0.498924	-0.154505	-0.128939	-0.283444
ENSG00000072818	ACAP1	2.02485	1.99373	2.11031	3.79453	0.80205	0.845581	0.778815	0.997007	0.992308	0.991044	-0.525757	-0.536955	-0.495444	-0.0415104	0.0303122	-0.0111982
ENSG00000072832	CRMP1	0.856366	0.496952	0.913109	0.920288	0.981361	0.718594	0.996629	0.763815	0.982063	0.7083	-0.0319298	-0.225943	-0.00355097	-0.222392	0.0283788	-0.194013
ENSG00000072840	EVC	3.71501	6.84921	2.60479	3.79843	0.99105	0.3662	0.438763	0.435181	0.576875	0.0533112	-0.0209063	0.609886	-0.332527	0.942413	-0.311621	0.630793
ENSG00000072849	DERL2	73.6122	97.7586	71.7927	97.231	0.310991	0.994184	0.257421	0.293693	0.982287	0.222083	-0.392172	0.00765033	-0.427313	0.434963	-0.0351409	0.399822
ENSG00000072864	NDE1	46.3671	49.2472	49.0221	39.6429	0.871464	0.885827	0.839213	0.975935	0.973159	0.997137	0.215955	0.299403	0.293052	0.0063509	0.0770962	0.0834471
ENSG00000072954	TMEM38A	1.35915	3.69041	1.19827	1.45123	0.985622	0.491196	0.946377	0.505695	0.976794	0.364902	-0.0390144	0.721422	-0.109819	0.831241	-0.0708045	0.760436
ENSG00000072958	AP1M1	72.1136	94.8005	75.6937	96.9376	0.20589	0.982669	0.373176	0.286919	0.960197	0.474251	-0.416781	-0.0315044	-0.348721	0.317217	0.0680593	0.385276
ENSG00000073008	PVR	56.61	75.3749	75.4143	58.7833	0.974744	0.766106	0.545091	0.706317	0.395291	0.999607	-0.0525282	0.348191	0.348925	-0.000734446	0.401453	0.400719
ENSG00000073009	IKBKG	13.1206	18.1565	11.4705	12.4708	0.988951	0.891656	0.983597	0.912427	0.974256	0.858096	0.0633707	0.4781	-0.103341	0.581442	-0.166712	0.41473
ENSG00000073050	XRCC1	15.3875	21.9549	17.9582	21.1144	0.256177	0.967415	0.753764	0.161633	0.804939	0.630622	-0.410741	0.0515289	-0.21181	0.263339	0.198931	0.46227
ENSG00000073060	SCARB1	124.519	152.176	138.862	144.308	0.645699	0.94384	0.964604	0.467339	0.788129	0.849719	-0.209655	0.0755695	-0.0547262	0.130296	0.154928	0.285224
ENSG00000073111	MCM2	174.999	222.43	175.354	194.978	0.863456	0.836777	0.870792	0.575895	0.99748	0.590018	-0.154293	0.188231	-0.151403	0.339634	0.00289066	0.342524
ENSG00000073150	PANX2	2.04539	2.06892	2.20931	2.36717	0.831793	0.88131	0.955447	0.992783	0.946561	0.965413	-0.11042	-0.102053	-0.0531149	-0.0489378	0.057305	0.00836712
ENSG00000073169	RP3-402G11.5	23.8435	17.3439	24.3368	18.0165	0.0654979	0.960197	0.0400065	0.0295439	0.978782	0.0189271	0.368612	-0.049311	0.39589	-0.445201	0.0272786	-0.417923
ENSG00000073331	ALPK1	0.949948	1.98043	0.83915	1.48096	0.76021	0.919538	0.611337	0.562428	0.964856	0.434363	-0.238796	0.193439	-0.294026	0.487465	-0.0552305	0.432235
ENSG00000073350	LLGL2	42.865	36.7499	39.7918	38.445	0.899853	0.976767	0.982094	0.839997	0.955923	0.954643	0.149629	-0.0617688	0.0472585	-0.109027	-0.102371	-0.211398
ENSG00000073417	PDE8A	14.1844	6.91091	13.7288	6.99773	0.00324853	0.992831	0.0393514	0.0249185	0.983865	0.0568633	0.846971	-0.0139883	0.805776	-0.819764	-0.0411953	-0.860959
ENSG00000073536	NLE1	70.2486	74.849	76.1729	81.4395	0.669233	0.899144	0.909189	0.943554	0.882878	0.986229	-0.207761	-0.118704	-0.094062	-0.0246421	0.113699	0.0890569
ENSG00000073578	SDHA	277.595	299.352	300.632	241.46	0.671793	0.64237	0.447239	0.921914	0.876051	0.995956	0.199654	0.307765	0.31388	-0.00611491	0.114226	0.108111
ENSG00000073584	SMARCE1	137.281	57.8243	143.426	73.9556	0.00176087	0.610378	0.00176087	0.00176087	0.949212	0.00176087	0.87477	-0.344425	0.937057	-1.28148	0.0622868	-1.21919
ENSG00000073614	KDM5A	42.0493	46.098	39.7088	45.3426	0.973554	0.992831	0.937342	0.964318	0.978474	0.920825	-0.10402	0.022838	-0.182787	0.205625	-0.0787673	0.126858
ENSG00000073670	ADAM11	0.218319	0.115029	0.226419	0.374565	0.86131	0.395078	0.855015	1	1	1	-0.0981964	-0.166986	-0.0929381	-0.0740477	0.00525828	-0.0687894
ENSG00000073711	PPP2R3A	6.13352	16.1896	6.17935	9.50563	0.0180295	0.494069	0.0207025	0.0750318	0.992627	0.0781487	-0.500388	0.660774	-0.492282	1.15306	0.00810635	1.16116
ENSG00000073712	FERMT2	53.4363	64.811	58.2163	55.4453	0.975234	0.702426	0.967415	0.591579	0.922213	0.873899	-0.0513579	0.217897	0.0679652	0.149932	0.119323	0.269255
ENSG00000073756	PTGS2	1.82411	52.0452	22.0009	3.20445	0.043231	0.00176087	0.00176087	0.00176087	0.00176087	0.00176087	-0.444622	3.37635	2.20527	1.17108	2.64989	3.82097
ENSG00000073792	IGF2BP2	22.8536	4.15805	19.5644	5.32395	0.00176087	0.852517	0.0104001	0.00176087	0.95547	0.00176087	1.76276	-0.250148	1.55796	-1.80811	-0.204803	-2.01291
ENSG00000073803	MAP3K13	14.2249	12.9464	15.7702	16.882	0.916267	0.887427	0.980236	0.976794	0.966942	0.940793	-0.218802	-0.337214	-0.0875517	-0.249662	0.13125	-0.118412
ENSG00000073849	ST6GAL1	8.7569	23.5497	11.2081	13.0687	0.479103	0.58314	0.855015	0.258748	0.751455	0.458218	-0.486293	0.761751	-0.190132	0.951883	0.296161	1.24804
ENSG00000073905	VDAC1P1	1.19994	1.02473	1.06155	1.15884	0.990145	0.966122	0.977944	0.949474	0.966551	0.990134	0.01865	-0.0625885	-0.0451326	-0.0174559	-0.0637826	-0.0812385
ENSG00000073921	PICALM	107.447	121.211	115.709	74.152	0.0617376	0.418395	0.0144433	0.893218	0.891486	0.973159	0.523279	0.694177	0.628271	0.0659064	0.104992	0.170899
ENSG00000073969	NSF	18.8631	18.1707	17.7257	15.7294	0.760791	0.831187	0.87096	0.980359	0.963362	0.985088	0.23481	0.186117	0.153933	0.0321847	-0.080877	-0.0486924
ENSG00000074047	GLI2	4.96703	6.89125	5.72793	4.05479	0.946561	0.754973	0.883641	0.88085	0.96989	0.959462	0.202467	0.554309	0.352005	0.202304	0.149538	0.351842
ENSG00000074054	CLASP1	32.0725	31.936	26.4005	30.9003	0.988162	0.990414	0.933862	0.998048	0.889415	0.923898	0.0505071	0.0447158	-0.212184	0.2569	-0.262691	-0.00579128
ENSG00000074071	MRPS34	470.205	524.831	464.101	519.198	0.639584	0.985622	0.564566	0.580613	0.983597	0.495069	-0.142418	0.0155087	-0.161189	0.176698	-0.0187707	0.157927
ENSG00000074201	CLNS1A	167.536	135.744	166.848	105.108	0.00176087	0.0886496	0.00176087	0.215473	0.993753	0.232127	0.662525	0.362923	0.656659	-0.293736	-0.00586656	-0.299602
ENSG00000074219	TEAD2	33.1765	29.1247	34.7231	37.7553	0.777491	0.520662	0.918096	0.831187	0.966257	0.771226	-0.176535	-0.353087	-0.114459	-0.238628	0.0620759	-0.176552
ENSG00000074266	EED	28.5623	26.3929	31.6313	20.6163	0.0241497	0.191853	0.00176087	0.850784	0.725429	0.380334	0.43439	0.328167	0.572442	-0.244274	0.138051	-0.106223
ENSG00000074319	TSG101	53.4407	78.3393	64.1925	72.1425	0.372659	0.934563	0.87211	0.0973203	0.62718	0.627694	-0.419355	0.115805	-0.163633	0.279438	0.255722	0.53516
ENSG00000074356	C17orf85	41.0381	36.6759	48.2876	37.2109	0.975707	0.990414	0.92194	0.906048	0.961635	0.778132	0.13436	-0.0198199	0.358948	-0.378768	0.224588	-0.15418
ENSG00000074370	ATP2A3	1.66191	7.25977	1.11629	1.50346	0.966346	0.399998	0.715878	0.452261	0.775586	0.233873	0.0638159	1.4022	-0.168951	1.57115	-0.232767	1.33838
ENSG00000074416	MGLL	108.948	64.7649	177.869	73.9411	0.442006	0.94224	0.125205	0.448985	0.49841	0.0777019	0.546931	-0.185791	1.24399	-1.42978	0.697063	-0.732722
ENSG00000074527	NTN4	15.6049	6.62842	16.0232	10.4928	0.675728	0.524645	0.59977	0.0654979	0.99026	0.0279957	0.49488	-0.533929	0.528758	-1.06269	0.0338782	-1.02881
ENSG00000074582	BCS1L	83.8313	87.3288	91.7714	78.2789	0.944161	0.905727	0.741847	0.978474	0.907055	0.974355	0.096483	0.154105	0.224127	-0.0700226	0.127644	0.0576215
ENSG00000074590	NUAK1	11.1256	7.32368	11.2815	6.16186	0.269706	0.933996	0.245749	0.660197	0.992831	0.634874	0.685414	0.192002	0.702448	-0.510447	0.0170347	-0.493412
ENSG00000074603	DPP8	10.1153	12.2417	10.7284	10.2373	0.992813	0.789202	0.977153	0.796592	0.971694	0.876682	-0.0144552	0.218836	0.0567658	0.16207	0.0712209	0.233291
ENSG00000074621	SLC24A1	2.28992	5.76543	2.97653	3.13176	0.89996	0.661708	0.989889	0.416804	0.944316	0.697135	-0.258503	0.597612	-0.0443136	0.641926	0.214189	0.856115
ENSG00000074657	ZNF532	9.01246	8.66247	7.18572	9.35556	0.98902	0.978474	0.811189	0.988034	0.845213	0.889518	-0.0442621	-0.0908572	-0.305934	0.215077	-0.261672	-0.0465951
ENSG00000074695	LMAN1	36.2326	31.9202	40.2021	30.0884	0.590551	0.955099	0.337056	0.753751	0.803759	0.48491	0.252751	0.0800928	0.395263	-0.31517	0.142511	-0.172659
ENSG00000074696	PTPLAD1	51.6421	54.3433	51.7051	50.8061	0.982825	0.894893	0.982287	0.942554	0.998241	0.944091	0.0226611	0.0935395	0.0243545	0.069185	0.00169338	0.0708783
ENSG00000074755	ZZEF1	6.78928	27.1717	7.91282	6.57572	0.966922	0.37795	0.401503	0.395732	0.538284	0.468895	0.0354872	1.76624	0.209038	1.5572	0.173551	1.73075
ENSG00000074800	ENO1	4320.27	3826.91	4496.1	4006.56	0.835795	0.934981	0.653188	0.641399	0.944529	0.440944	0.108705	-0.0661503	0.166232	-0.232382	0.0575265	-0.174855
ENSG00000074842	C19orf10	149.56	125.371	144.966	128.499	0.399089	0.973386	0.572349	0.302617	0.957701	0.468895	0.21585	-0.0350019	0.171444	-0.206446	-0.0444066	-0.250852
ENSG00000074855	ANO8	3.30396	2.39926	3.33386	2.4074	0.705481	0.998048	0.696079	0.736304	0.994977	0.7285	0.267142	-0.00266697	0.275252	-0.277919	0.00811006	-0.269809
ENSG00000074935	TUBE1	8.78451	14.7839	10.0041	12.2187	0.531175	0.796097	0.781826	0.17849	0.911374	0.409106	-0.398829	0.239288	-0.244262	0.483551	0.154567	0.638117
ENSG00000074964	ARHGEF10L	3.06845	6.55568	3.9241	4.23068	0.6084	0.628864	0.976767	0.171385	0.763815	0.575569	-0.297845	0.457493	-0.0727936	0.530287	0.225051	0.755338
ENSG00000075089	ACTR6	12.5076	13.6895	15.5944	16.5596	0.608889	0.787134	0.974686	0.936863	0.751903	0.897618	-0.355357	-0.242366	-0.0770493	-0.165317	0.278307	0.112991
ENSG00000075131	TIPIN	37.5686	48.6335	35.8239	23.2927	0.061101	0.0973203	0.107511	0.712696	0.965544	0.638402	0.645635	1.00137	0.580577	0.420794	-0.0650579	0.355736
ENSG00000075142	SRI	175.157	230.781	187.905	205.681	0.57929	0.769257	0.840738	0.157784	0.894497	0.414196	-0.229341	0.164604	-0.129091	0.293695	0.100249	0.393945
ENSG00000075151	EIF4G3	19.9463	15.0918	21.0635	19.2025	0.983975	0.832717	0.971279	0.628752	0.977058	0.671084	0.0497433	-0.31093	0.121377	-0.432307	0.0716337	-0.360673
ENSG00000075188	NUP37	42.3268	46.8492	47.4165	36.565	0.537413	0.425557	0.0822005	0.834971	0.670076	0.989159	0.200887	0.341043	0.357701	-0.0166579	0.156814	0.140156
ENSG00000075218	GTSE1	15.904	12.2448	13.908	14.2499	0.698086	0.519672	0.97556	0.0886496	0.577736	0.622884	0.139851	-0.189995	-0.0306784	-0.159317	-0.170529	-0.329847
ENSG00000075223	SEMA3C	14.6018	12.0379	14.8837	12.6575	0.827016	0.970762	0.803759	0.651326	0.986677	0.627981	0.179701	-0.0623119	0.203992	-0.266304	0.0242914	-0.242013
ENSG00000075234	TTC38	33.5609	33.532	34.0177	34.6363	0.959076	0.95547	0.978474	0.998048	0.984381	0.982645	-0.042982	-0.0441549	-0.0245678	-0.0195872	0.0184142	-0.00117294
ENSG00000075239	ACAT1	88.8295	79.3981	92.5344	88.6535	0.998212	0.920707	0.971637	0.940793	0.97772	0.858944	0.00279822	-0.155368	0.0604767	-0.215844	0.0576785	-0.158166
ENSG00000075240	GRAMD4	2.04111	2.22092	3.66917	2.94492	0.857116	0.864978	0.949158	0.980374	0.774653	0.749215	-0.291196	-0.22839	0.19719	-0.42558	0.488386	0.0628059
ENSG00000075275	CELSR1	9.40293	9.16958	9.67772	8.54234	0.945005	0.974916	0.907327	0.989712	0.985889	0.978474	0.113209	0.0833798	0.147563	-0.0641837	0.0343541	-0.0298296
ENSG00000075292	ZNF638	42.1967	84.2192	46.6099	45.3359	0.960361	0.522523	0.987195	0.452474	0.917774	0.541052	-0.0989961	0.865074	0.0383154	0.826759	0.137312	0.964071
ENSG00000075303	SLC25A40	18.6789	26.2312	14.2349	10.1858	0.691904	0.686171	0.905716	0.912083	0.908869	0.80205	0.762958	1.21209	0.413898	0.798192	-0.349061	0.449131
ENSG00000075336	TIMM21	28.5323	30.2002	27.5441	26.0149	0.815889	0.645177	0.9266	0.930964	0.964318	0.836183	0.124142	0.200875	0.0766757	0.1242	-0.0474662	0.0767334
ENSG00000075391	RASAL2	9.68411	9.86058	11.8426	7.94051	0.365409	0.306804	0.00704704	0.982307	0.305706	0.427036	0.233156	0.254783	0.477723	-0.22294	0.244567	0.0216267
ENSG00000075399	VPS9D1	1.7593	5.09454	2.15876	3.26798	0.449079	0.765037	0.740397	0.293693	0.934981	0.494167	-0.486786	0.429459	-0.341096	0.770556	0.145689	0.916245
ENSG00000075407	ZNF37A	5.81731	6.42289	4.69544	7.0756	0.804498	0.891312	0.20775	0.938252	0.812575	0.41365	-0.215321	-0.107678	-0.438814	0.331136	-0.223493	0.107643
ENSG00000075413	MARK3	28.4566	61.1609	31.1279	19.2536	0.374087	0.0353284	0.130819	0.310861	0.941683	0.401141	0.519048	1.57132	0.64034	0.930985	0.121292	1.05228
ENSG00000075415	SLC25A3	634.191	645.894	654.501	584.488	0.736744	0.663891	0.567045	0.977555	0.950195	0.983956	0.117358	0.143656	0.162696	-0.0190394	0.0453372	0.0262978
ENSG00000075420	FNDC3B	59.246	57.0866	67.9425	29.1006	0.196803	0.252032	0.0862881	0.987647	0.935603	0.909325	0.977673	0.925889	1.16923	-0.243338	0.191554	-0.0517846
ENSG00000075426	FOSL2	90.9853	101.915	137.309	71.5608	0.759432	0.591245	0.104291	0.94001	0.449446	0.694453	0.338065	0.498395	0.921279	-0.422885	0.583214	0.160329
ENSG00000075539	FRYL	14.9148	14.755	13.0127	11.4869	0.78293	0.884398	0.929567	0.995198	0.914103	0.949468	0.326727	0.313033	0.154625	0.158408	-0.172103	-0.0136944
ENSG00000075568	TMEM131	14.3832	12.0138	15.1967	12.3559	0.956681	0.99087	0.852517	0.942146	0.980339	0.816641	0.190573	-0.0347956	0.260488	-0.295284	0.0699146	-0.225369
ENSG00000075618	FSCN1	447.582	319.692	452.281	348.072	0.0180295	0.748819	0.0163159	0.00324853	0.985177	0.00176087	0.360933	-0.121972	0.375933	-0.497905	0.0150007	-0.482904
ENSG00000075624	ACTB	12991.1	10809.7	13278.7	10459	0.172021	0.969978	0.233873	0.382027	0.975707	0.424585	0.312725	0.0475726	0.34431	-0.296738	0.0315855	-0.265152
ENSG00000075643	MOCOS	19.4219	28.4832	25.4092	27.3453	0.780752	0.988973	0.978407	0.803216	0.863262	0.969892	-0.454043	0.0548849	-0.0984692	0.153354	0.355574	0.508928
ENSG00000075651	PLD1	8.22433	12.2245	10.12	8.09525	0.993102	0.669504	0.85655	0.745515	0.902287	0.934981	0.0183297	0.494701	0.263713	0.230988	0.245383	0.476372
ENSG00000075702	WDR62	12.3168	10.9944	13.241	11.5679	0.905243	0.934228	0.638797	0.709771	0.869117	0.368281	0.0775116	-0.0623074	0.16776	-0.230068	0.0902485	-0.139819
ENSG00000075711	DLG1	45.4534	60.6706	49.1042	38.117	0.799295	0.271875	0.668582	0.566834	0.94676	0.764714	0.242298	0.643575	0.349228	0.294347	0.10693	0.401277
ENSG00000075785	RAB7A	255.61	248.786	279.142	239.069	0.927644	0.967863	0.66881	0.978474	0.873899	0.800974	0.0957425	0.0570107	0.221853	-0.164842	0.12611	-0.0387318
ENSG00000075790	BCAP29	113.322	67.6043	145.088	139.174	0.927019	0.592498	0.988666	0.623947	0.852071	0.499525	-0.291807	-1.02023	0.0592051	-1.07943	0.351012	-0.728419
ENSG00000075856	SART3	39.9924	28.369	50.3497	31.3677	0.682471	0.958948	0.321355	0.580613	0.706388	0.288367	0.331676	-0.135853	0.649729	-0.785582	0.318053	-0.467529
ENSG00000075914	EXOSC7	32.9268	54.0135	38.0744	44.111	0.583983	0.756281	0.866955	0.105185	0.855253	0.363303	-0.400776	0.280664	-0.20243	0.483094	0.198346	0.68144
ENSG00000075945	KIFAP3	15.9745	18.8518	12.6141	14.821	0.930514	0.467171	0.528376	0.840076	0.626435	0.135167	0.0956882	0.309908	-0.202902	0.512811	-0.298591	0.21422
ENSG00000075975	MKRN2	15.6881	14.0224	15.5091	16.6941	0.960717	0.745707	0.948923	0.886631	0.992469	0.907124	-0.0798039	-0.222493	-0.0944781	-0.128015	-0.0146742	-0.142689
ENSG00000076003	MCM6	57.8192	66.9971	59.7976	65.374	0.791241	0.979852	0.878988	0.718649	0.977424	0.813038	-0.171583	0.0343438	-0.124641	0.158985	0.0469422	0.205927
ENSG00000076043	REXO2	71.2085	69.8596	74.7761	68.4737	0.964615	0.983597	0.86291	0.983975	0.948983	0.912167	0.0549262	0.0280959	0.123572	-0.0954764	0.0686461	-0.0268303
ENSG00000076053	RBM7	27.3095	25.7086	34.0912	24.1758	0.903182	0.976794	0.378176	0.977944	0.683798	0.725392	0.163135	0.0821002	0.463413	-0.381313	0.300279	-0.0810345
ENSG00000076067	RBMS2	11.3498	11.1062	9.98283	9.14831	0.780777	0.909354	0.956788	0.991022	0.901565	0.960523	0.259993	0.233424	0.104144	0.129281	-0.155849	-0.0265687
ENSG00000076108	BAZ2A	40.9375	38.8953	39.5779	34.0358	0.781878	0.901612	0.865125	0.977944	0.984002	0.991225	0.252807	0.182504	0.206386	-0.0238818	-0.0464213	-0.0703031
ENSG00000076201	PTPN23	24.1743	27.0822	26.8328	21.2489	0.808058	0.650925	0.524116	0.903096	0.882629	0.993494	0.170988	0.322974	0.310548	0.0124255	0.13956	0.151985
ENSG00000076242	MLH1	28.8597	38.2201	33.8865	29.1011	0.996478	0.909476	0.945173	0.933014	0.954237	0.976767	-0.0112416	0.370951	0.206476	0.164475	0.217717	0.382193
ENSG00000076248	UNG	162.777	153.57	178.523	156.697	0.98787	0.992894	0.954586	0.984346	0.971586	0.950891	0.05424	-0.028711	0.185908	-0.214619	0.131668	-0.082951
ENSG00000076321	KLHL20	7.23545	9.79465	6.59266	6.67344	0.968142	0.538284	0.993325	0.589932	0.948779	0.315721	0.090578	0.443456	-0.0134995	0.456956	-0.104077	0.352878
ENSG00000076351	SLC46A1	30.5359	28.5897	31.1661	29.0441	0.978064	0.990826	0.968416	0.966366	0.990414	0.95108	0.0677134	-0.0212731	0.0953903	-0.116663	0.0276769	-0.0889865
ENSG00000076356	PLXNA2	8.81751	5.46348	7.64428	4.43376	0.0649905	0.827601	0.198196	0.32114	0.895195	0.576875	0.749634	0.214186	0.584011	-0.369825	-0.165623	-0.535448
ENSG00000076382	SPAG5	41.5782	44.7407	44.4392	35.8033	0.89661	0.840057	0.797493	0.974368	0.971482	0.99594	0.205094	0.306167	0.296831	0.00933622	0.0917365	0.101073
ENSG00000076513	ANKRD13A	10.5104	7.27868	10.2871	8.69783	0.723245	0.737792	0.765447	0.28667	0.987128	0.330518	0.22581	-0.205327	0.199826	-0.405153	-0.0259835	-0.431136
ENSG00000076554	TPD52	474.978	380.499	512.735	397.46	0.757277	0.981418	0.598434	0.761925	0.942554	0.652661	0.255872	-0.0625951	0.365779	-0.428374	0.109907	-0.318467
ENSG00000076555	ACACB	3.99247	15.4817	4.03209	6.19618	0.707297	0.533126	0.714384	0.238754	0.996071	0.245749	-0.451801	1.09282	-0.442294	1.53512	0.00950717	1.54462
ENSG00000076604	TRAF4	116.273	98.4383	142.665	86.4825	0.319069	0.824417	0.0144433	0.725607	0.562428	0.106601	0.418657	0.182845	0.709252	-0.526406	0.290595	-0.235811
ENSG00000076641	PAG1	0.603096	0.715453	0.636831	0.0428511	0.0781487	0.0580922	0.0700596	0.941416	0.98897	0.964763	0.349644	0.410609	0.368221	0.0423878	0.0185766	0.0609644
ENSG00000076650	GPATCH1	6.21475	4.9614	6.61688	7.07891	0.862433	0.50795	0.971815	0.654085	0.96272	0.684673	-0.144302	-0.383142	-0.0753535	-0.307788	0.0689489	-0.238839
ENSG00000076662	ICAM3	27.4419	19.5445	27.3212	26.4966	0.977197	0.624115	0.978474	0.57588	0.995286	0.576443	0.047081	-0.40347	0.0411544	-0.444625	-0.00592663	-0.450551
ENSG00000076685	NT5C2	59.3986	58.8681	54.0558	56.3616	0.974744	0.98007	0.978521	0.993753	0.925616	0.94436	0.0731863	0.0606669	-0.0581558	0.118823	-0.131342	-0.0125194
ENSG00000076706	MCAM	49.1622	88.8859	52.1136	67.7013	0.626874	0.743888	0.688196	0.213061	0.973426	0.249148	-0.446107	0.382871	-0.365194	0.748065	0.0809129	0.828978
ENSG00000076770	MBNL3	8.25948	8.98529	9.60955	8.46326	0.988513	0.978474	0.935688	0.967095	0.90624	0.978474	-0.0283748	0.0702405	0.14998	-0.0797391	0.178354	0.0986153
ENSG00000076826	CAMSAP3	8.29503	11.319	8.78648	10.846	0.782788	0.97498	0.899799	0.633641	0.984996	0.805912	-0.319371	0.0521666	-0.252095	0.304262	0.0672761	0.371538
ENSG00000076864	RAP1GAP	6.15137	5.61248	6.29883	4.00216	0.310991	0.51641	0.206788	0.961961	0.989042	0.937797	0.441561	0.342885	0.467426	-0.124541	0.0258654	-0.098676
ENSG00000076924	XAB2	45.8692	48.4957	46.4362	44.8846	0.974237	0.867639	0.948617	0.924846	0.984384	0.949654	0.0299836	0.107046	0.0469716	0.0600749	0.016988	0.0770628
ENSG00000076928	ARHGEF1	35.791	41.5245	37.2479	39.779	0.885804	0.979705	0.957671	0.884398	0.977955	0.94102	-0.144735	0.0590498	-0.0901625	0.149212	0.0545728	0.203785
ENSG00000076944	STXBP2	48.3244	54.4811	47.1755	62.7002	0.649381	0.92177	0.625724	0.953767	0.989117	0.941148	-0.362512	-0.196002	-0.39583	0.199828	-0.0333183	0.16651
ENSG00000076984	MAP2K7	20.464	23.3818	20.9562	24.6291	0.29142	0.921075	0.415058	0.61782	0.975707	0.716931	-0.245389	-0.0692093	-0.21412	0.144911	0.031269	0.17618
ENSG00000077044	DGKD	66.8969	58.0604	89.5188	64.0519	0.990826	0.977955	0.906564	0.970964	0.945774	0.82377	0.060839	-0.137186	0.470468	-0.607654	0.409629	-0.198025
ENSG00000077097	TOP2B	36.0554	40.6121	33.383	34.3262	0.939858	0.723178	0.976767	0.827408	0.868654	0.664583	0.0670907	0.230253	-0.0379541	0.268207	-0.105045	0.163162
ENSG00000077147	TM9SF3	68.5664	74.1537	64.0394	74.6666	0.948259	0.995956	0.821932	0.970758	0.960344	0.901185	-0.119617	-0.00968407	-0.215271	0.205587	-0.0956544	0.109933
ENSG00000077150	NFKB2	87.6502	68.2306	113.686	50.4364	0.00176087	0.28265	0.00176087	0.411504	0.0295439	0.0144433	0.773738	0.421531	1.14157	-0.720043	0.367836	-0.352207
ENSG00000077152	UBE2T	63.1702	51.4425	60.05	56.8775	0.720731	0.756223	0.917821	0.250306	0.924516	0.501016	0.146496	-0.139729	0.0757148	-0.215444	-0.0707812	-0.286225
ENSG00000077157	PPP1R12B	3.12044	5.80998	3.551	5.93815	0.543359	0.992273	0.665206	0.36995	0.962766	0.515922	-0.632535	-0.023484	-0.516055	0.492571	0.11648	0.609051
ENSG00000077232	DNAJC10	34.6837	45.1939	43.0501	37.6702	0.943854	0.801073	0.864388	0.615992	0.674543	0.9751	-0.112917	0.250545	0.183475	0.0670701	0.296391	0.363461
ENSG00000077235	GTF3C1	64.6744	74.1864	83.6347	85.7711	0.631506	0.904058	0.986275	0.931649	0.690552	0.932204	-0.396613	-0.204213	-0.0355505	-0.168662	0.361063	0.192401
ENSG00000077238	IL4R	16.9083	43.5348	22.207	15.5882	0.963859	0.485458	0.606841	0.539047	0.661531	0.667262	0.104412	1.37236	0.460816	0.911545	0.356405	1.26795
ENSG00000077254	USP33	21.7441	42.4302	23.3872	29.9641	0.0125108	0.605627	0.169201	0.207042	0.8664	0.295056	-0.428883	0.475088	-0.332351	0.807439	0.0965322	0.903972
ENSG00000077312	SNRPA	425.757	364.527	434.457	455.499	0.957671	0.771815	0.976026	0.874608	0.988589	0.85691	-0.0969771	-0.319849	-0.0679291	-0.25192	0.0290481	-0.222872
ENSG00000077348	EXOSC5	59.8768	98.4225	61.6036	62.8951	0.982287	0.721852	0.99105	0.685892	0.98902	0.708648	-0.068711	0.629901	-0.0290011	0.658902	0.0397098	0.698612
ENSG00000077380	DYNC1I2	46.9941	42.3844	44.8105	45.5802	0.974672	0.914103	0.984874	0.85198	0.95547	0.949257	0.0422467	-0.100309	-0.0235292	-0.0767795	-0.0657759	-0.142555
ENSG00000077420	APBB1IP	1.42876	0.598442	1.12051	1.06079	0.698888	0.426301	0.97736	0.133639	0.774126	0.344879	0.163783	-0.236257	0.0278778	-0.264135	-0.135905	-0.40004
ENSG00000077454	LRCH4	11.4027	15.9641	13.9607	12.8276	0.792372	0.629295	0.876745	0.376908	0.506805	0.829627	-0.145761	0.276832	0.106239	0.170593	0.252	0.422593
ENSG00000077458	FAM76B	9.58332	22.7713	10.8811	13.7775	0.727999	0.796124	0.886993	0.620715	0.959837	0.685815	-0.44582	0.650801	-0.292613	0.943414	0.153207	1.09662
ENSG00000077463	SIRT6	21.7436	29.7351	23.6574	25.9945	0.650092	0.831079	0.88854	0.375629	0.90828	0.605378	-0.237605	0.180936	-0.125768	0.306704	0.111836	0.418541
ENSG00000077514	POLD3	26.1653	25.3299	34.5972	28.0718	0.957449	0.926123	0.699494	0.983975	0.552528	0.502894	-0.0944924	-0.137931	0.283322	-0.421253	0.377814	-0.0434387
ENSG00000077549	CAPZB	221.279	170.533	231.903	182.308	0.566834	0.942363	0.372195	0.475751	0.964318	0.322955	0.276729	-0.0952464	0.343792	-0.439038	0.0670628	-0.371975
ENSG00000077616	NAALAD2	0.123913	0.322449	0.158942	0.324952	0.0836088	0.995976	0.245749	0.112511	1	0.269706	-0.130476	-0.00155402	-0.106876	0.105322	0.0235998	0.128922
ENSG00000077684	PHF17	21.2277	17.4358	16.4357	23.487	0.937797	0.610378	0.493189	0.746318	0.62568	0.967995	-0.133915	-0.391045	-0.467259	0.0762143	-0.333344	-0.25713
ENSG00000077713	SLC25A43	21.1787	44.0177	20.9374	16.33	0.503697	0.148422	0.534277	0.387567	0.991904	0.379217	0.338593	1.32798	0.323495	1.00449	-0.0150978	0.989389
ENSG00000077721	UBE2A	66.6949	94.4286	73.6632	77.2063	0.6084	0.580613	0.946343	0.183626	0.801325	0.449324	-0.205412	0.283846	-0.0660234	0.349869	0.139389	0.489258
ENSG00000077782	FGFR1	24.7392	34.3725	22.5084	18.6238	0.673458	0.138717	0.841277	0.639125	0.958504	0.480552	0.374646	0.818538	0.248966	0.569572	-0.12568	0.443892
ENSG00000077809	GTF2I	210.104	214.628	209.964	256.636	0.36995	0.644616	0.395732	0.983975	0.998981	0.983597	-0.286151	-0.255703	-0.287104	0.0314005	-0.00095257	0.0304479
ENSG00000077942	FBLN1	38.1243	50.9879	43.8841	35.8346	0.933862	0.460742	0.512671	0.566834	0.724032	0.834247	0.08477	0.485957	0.278288	0.207669	0.193518	0.401187
ENSG00000078043	PIAS2	10.1381	8.33541	9.86731	8.59472	0.838303	0.984129	0.888649	0.735254	0.986071	0.806854	0.196197	-0.0357498	0.163647	-0.199397	-0.0325497	-0.231947
ENSG00000078061	ARAF	54.7334	99.7267	55.8212	66.0698	0.441907	0.65798	0.535741	0.477412	0.983224	0.495902	-0.262817	0.579612	-0.235416	0.815028	0.0274002	0.842428
ENSG00000078070	MCCC1	5.97331	10.1882	6.99805	6.83884	0.959837	0.827042	0.991974	0.741908	0.946377	0.835589	-0.148678	0.463556	0.0257553	0.437801	0.174434	0.612234
ENSG00000078098	FAP	0.565848	1.8394	0.327864	1.12138	0.580333	0.697061	0.16508	0.0478315	0.67898	0.0104001	-0.282748	0.298697	-0.423177	0.721874	-0.140429	0.581445
ENSG00000078124	ACER3	14.2864	13.241	15.7359	12.7212	0.936021	0.984109	0.832568	0.967415	0.955255	0.885173	0.145772	0.0500623	0.268777	-0.218715	0.123005	-0.0957102
ENSG00000078140	UBE2K	137.591	178.48	130.976	119.245	0.685675	0.432092	0.860882	0.646562	0.950807	0.580613	0.203281	0.573914	0.133241	0.440673	-0.07004	0.370633
ENSG00000078142	PIK3C3	33.1375	53.3136	35.6168	38.6606	0.776298	0.330518	0.927505	0.0771335	0.945556	0.180244	-0.21062	0.444003	-0.112254	0.556257	0.0983656	0.654623
ENSG00000078177	N4BP2	1.10879	1.70232	1.10565	1.21612	0.92542	0.603918	0.9203	0.43892	0.997168	0.433836	-0.0489681	0.203108	-0.050426	0.253534	-0.00145792	0.252076
ENSG00000078237	C12orf5	41.4979	51.4432	38.4557	58.3486	0.104762	0.822991	0.0309815	0.621291	0.923274	0.404814	-0.472375	-0.175314	-0.576977	0.401663	-0.104603	0.297061
ENSG00000078246	TULP3	11.3865	22.1908	11.8927	17.899	0.706179	0.913982	0.766106	0.482187	0.989065	0.563024	-0.571917	0.281763	-0.518369	0.800131	0.0535482	0.85368
ENSG00000078269	SYNJ2	9.88152	10.8792	8.83746	8.84341	0.956706	0.839978	0.999581	0.956628	0.964126	0.864464	0.131901	0.248224	-0.000791853	0.249016	-0.132693	0.116324
ENSG00000078304	PPP2R5C	69.0925	79.4106	98.4375	85.9808	0.892909	0.973798	0.95388	0.941892	0.762038	0.882318	-0.307491	-0.111972	0.191037	-0.303009	0.498529	0.195519
ENSG00000078319	PMS2P1	30.4619	16.7783	35.1286	14.1522	0.695293	0.978474	0.607509	0.788864	0.973288	0.699276	1.00702	0.217336	1.2008	-0.983464	0.193783	-0.789681
ENSG00000078369	GNB1	165.057	134.377	191.565	153.225	0.947219	0.886993	0.614051	0.764485	0.81393	0.423311	0.10598	-0.186761	0.318457	-0.505218	0.212478	-0.29274
ENSG00000078399	HOXA9	0.274743	0.840859	0.441776	1.43116	0.528376	0.931674	0.718256	0.67898	0.920049	0.877625	-0.592993	-0.272369	-0.490766	0.218396	0.102227	0.320624
ENSG00000078401	EDN1	8.09191	17.2645	12.0202	6.38967	0.420765	0.00176087	0.00176087	0.00176087	0.0279957	0.0171566	0.266513	1.19926	0.740821	0.458438	0.474308	0.932745
ENSG00000078403	MLLT10	16.5307	13.3791	11.5985	10.7522	0.629131	0.902222	0.963477	0.958125	0.732555	0.954027	0.539171	0.270225	0.0927014	0.177524	-0.44647	-0.268946
ENSG00000078487	ZCWPW1	2.26116	1.3499	3.12871	2.87384	0.961635	0.805648	0.986234	0.867474	0.915834	0.680331	-0.193813	-0.540941	0.0735371	-0.614478	0.26735	-0.347128
ENSG00000078618	NRD1	143.93	126.568	147.038	122.124	0.70881	0.975651	0.630537	0.800895	0.98438	0.734787	0.233494	0.0507495	0.263898	-0.213149	0.0304037	-0.182745
ENSG00000078668	VDAC3	142.819	149.296	147.935	131.08	0.783248	0.629629	0.640056	0.945263	0.959692	0.990145	0.121957	0.18508	0.172043	0.0130366	0.0500863	0.063123
ENSG00000078674	PCM1	40.4401	68.0465	37.91	35.2726	0.872638	0.456835	0.956263	0.583838	0.963488	0.523055	0.187313	0.910198	0.0986348	0.811563	-0.0886778	0.722885
ENSG00000078699	CBFA2T2	5.79506	8.08048	5.65624	7.12857	0.844159	0.960361	0.819181	0.824035	0.990145	0.813086	-0.227829	0.143104	-0.253753	0.396856	-0.0259241	0.370932
ENSG00000078747	ITCH	11.0118	9.78817	10.8125	7.22863	0.139653	0.531416	0.0826771	0.91024	0.987097	0.913982	0.495632	0.353151	0.473364	-0.120212	-0.0222685	-0.142481
ENSG00000078804	TP53INP2	1.12804	0.293659	1.16996	0.700498	0.76465	0.643901	0.722796	0.276123	0.988666	0.262912	0.212033	-0.235575	0.231239	-0.466814	0.0192057	-0.447608
ENSG00000078808	SDF4	84.9563	92.9286	85.0744	91.5012	0.828544	0.987012	0.826951	0.87956	0.997171	0.877501	-0.104694	0.0218579	-0.102736	0.124594	0.00195807	0.126552
ENSG00000078902	TOLLIP	22.0136	20.3536	21.7815	24.9199	0.880754	0.842847	0.882878	0.964491	0.992831	0.974309	-0.164821	-0.268166	-0.178833	-0.0893325	-0.014012	-0.103345
ENSG00000078967	UBE2D4	22.1678	22.8553	21.5226	19.9738	0.870487	0.816997	0.926132	0.980844	0.97983	0.953637	0.137302	0.177769	0.0982632	0.079506	-0.0390386	0.0404674
ENSG00000079134	THOC1	21.7856	19.2555	21.3854	18.2237	0.761348	0.964491	0.798899	0.885325	0.989767	0.912472	0.234041	0.0717892	0.209561	-0.137772	-0.0244803	-0.162252
ENSG00000079150	FKBP7	8.77397	3.96705	9.50025	7.43158	0.890528	0.489121	0.778461	0.337175	0.963477	0.280182	0.191979	-0.660482	0.286094	-0.946575	0.0941153	-0.85246
ENSG00000079156	OSBPL6	1.9138	0.890495	2.58785	1.36725	0.638494	0.506714	0.307608	0.126907	0.796152	0.0496622	0.216999	-0.220254	0.446247	-0.666502	0.229248	-0.437253
ENSG00000079215	SLC1A3	98.684	146.726	104.019	107.856	0.931539	0.624637	0.978474	0.440162	0.965786	0.527085	-0.125779	0.437043	-0.0512908	0.488334	0.0744884	0.562822
ENSG00000079246	XRCC5	437.339	563.813	505.151	458.025	0.970797	0.654314	0.896801	0.565731	0.817538	0.893204	-0.0663777	0.298613	0.140703	0.15791	0.207081	0.364991
ENSG00000079257	LXN	19.7657	16.6886	18.9977	11.8376	0.327468	0.766116	0.394523	0.905833	0.98152	0.943351	0.653463	0.433565	0.601638	-0.168073	-0.0518251	-0.219898
ENSG00000079277	MKNK1	32.8166	49.5216	31.7571	35.6374	0.945005	0.613334	0.905243	0.451608	0.982483	0.403371	-0.112392	0.45301	-0.156976	0.609986	-0.0445844	0.565402
ENSG00000079308	TNS1	8.63213	10.3973	7.50553	5.45738	0.204194	0.197927	0.446715	0.852517	0.823425	0.62718	0.51169	0.733285	0.350098	0.383187	-0.161592	0.221595
ENSG00000079313	REXO1	46.8946	84.446	48.0872	70.3201	0.836306	0.97217	0.839494	0.8117	0.992541	0.807167	-0.564722	0.257403	-0.529955	0.787357	0.0347668	0.822124
ENSG00000079332	SAR1A	69.6367	96.3596	66.3866	56.859	0.723263	0.160126	0.830844	0.489608	0.970806	0.402602	0.283436	0.740803	0.216451	0.524352	-0.0669852	0.457367
ENSG00000079335	CDC14A	0.564956	0.498334	0.910843	0.511438	0.964922	0.992487	0.500978	0.966551	0.619222	0.692991	0.0304204	-0.0075473	0.212923	-0.220471	0.182503	-0.0379677
ENSG00000079337	RAPGEF3	0.340722	0.337484	0.478405	0.403808	0.959939	0.956849	0.961635	0.996629	0.864102	0.857266	-0.0383681	-0.0403652	0.0440903	-0.0844555	0.0824584	-0.00199711
ENSG00000079387	SENP1	20.0663	22.3727	19.3488	16.7517	0.932252	0.840996	0.951642	0.970046	0.989042	0.951422	0.234823	0.378245	0.187134	0.191111	-0.0476898	0.143421
ENSG00000079393	DUSP13	0.24198	0.0551715	0.253863	0.681428	0.535366	0.0249185	0.593374	1	1	1	-0.258228	-0.383743	-0.250602	-0.133141	0.00762642	-0.125515
ENSG00000079432	CIC	24.1707	19.0686	23.8927	28.4651	0.862876	0.297257	0.85472	0.735212	0.993509	0.759639	-0.219205	-0.532063	-0.234612	-0.297451	-0.0154071	-0.312858
ENSG00000079459	FDFT1	91.1395	84.0881	101.472	97.5187	0.897015	0.697502	0.951741	0.903556	0.754038	0.553822	-0.0955745	-0.209154	0.0562009	-0.265355	0.151775	-0.113579
ENSG00000079462	PAFAH1B3	104.985	81.9074	115.491	83.1644	0.531042	0.98882	0.223143	0.463304	0.889518	0.168533	0.329086	-0.0214524	0.464228	-0.48568	0.135142	-0.350539
ENSG00000079482	OPHN1	3.60824	2.10646	3.59674	3.8224	0.982307	0.509816	0.984381	0.255266	0.998212	0.397303	-0.0540659	-0.503719	-0.0570272	-0.446691	-0.00296136	-0.449653
ENSG00000079616	KIF22	75.9362	73.935	82.2807	73.6535	0.972316	0.994387	0.788864	0.97597	0.876216	0.7888	0.0428868	0.00535818	0.155795	-0.150437	0.112909	-0.0375286
ENSG00000079691	LRRC16A	9.5159	8.20404	9.35816	7.49865	0.170489	0.886589	0.22048	0.725995	0.982362	0.765743	0.277833	0.103346	0.257935	-0.154589	-0.019898	-0.174487
ENSG00000079739	PGM1	103.3	89.9182	104.642	91.3516	0.520577	0.980339	0.446715	0.41477	0.983597	0.347223	0.173759	-0.0223242	0.192029	-0.214353	0.0182703	-0.196083
ENSG00000079785	DDX1	63.5972	52.5929	66.2936	54.907	0.331748	0.917445	0.132449	0.125205	0.920485	0.0332405	0.205028	-0.0598928	0.263144	-0.323037	0.0581162	-0.264921
ENSG00000079805	DNM2	124.242	146.044	124.342	114.946	0.923091	0.643465	0.906946	0.829516	0.998981	0.803154	0.110349	0.340184	0.111492	0.228692	0.00114235	0.229834
ENSG00000079819	EPB41L2	31.5244	23.7418	33.345	19.0794	0.204564	0.793937	0.162631	0.600702	0.973404	0.537229	0.669378	0.288279	0.745672	-0.457393	0.0762946	-0.381099
ENSG00000079841	RIMS1	17.3752	17.3716	18.0086	19.5075	0.764552	0.775093	0.877448	0.999581	0.967011	0.968512	-0.150629	-0.150897	-0.10422	-0.0466771	0.046409	-0.000268084
ENSG00000079950	STX7	11.3861	9.59252	11.8563	8.58186	0.422726	0.92262	0.298494	0.823836	0.974267	0.7499	0.339142	0.131601	0.388949	-0.257348	0.0498064	-0.207541
ENSG00000079974	RABL2B	5.55957	7.69548	5.8761	9.72949	0.234777	0.640373	0.127348	0.588591	0.977611	0.58232	-0.633764	-0.274756	-0.574587	0.299831	0.0591773	0.359008
ENSG00000079999	KEAP1	95.078	111.901	81.493	109.19	0.818319	0.984967	0.411969	0.755264	0.779693	0.323326	-0.195811	0.0347534	-0.4133	0.448053	-0.217489	0.230564
ENSG00000080031	PTPRH	2.67168	1.3121	3.26443	1.68849	0.666857	0.910147	0.384447	0.419131	0.895701	0.215473	0.340911	-0.155284	0.513247	-0.668531	0.172336	-0.496195
ENSG00000080189	SLC35C2	41.3388	62.4501	45.6179	57.7635	0.0163159	0.834826	0.167902	0.00176087	0.78749	0.0325417	-0.463605	0.108918	-0.327761	0.436679	0.135845	0.572523
ENSG00000080200	CRYBG3	4.34681	4.89845	4.22955	3.97742	0.94234	0.797141	0.967755	0.921824	0.984967	0.885698	0.0865087	0.206749	0.059605	0.147144	-0.0269037	0.120241
ENSG00000080298	RFX3	0.419284	0.110304	0.553731	0.447668	0.985622	0.480552	0.945028	0.502342	0.924846	0.438186	-0.0168277	-0.213957	0.0611987	-0.275156	0.0780264	-0.197129
ENSG00000080345	RIF1	13.0578	12.1854	13.1356	10.5229	0.353446	0.58692	0.24754	0.866533	0.992014	0.814426	0.265942	0.179838	0.273377	-0.093539	0.00743486	-0.0861042
ENSG00000080371	RAB21	45.3457	59.7718	52.6382	44.0896	0.980525	0.418084	0.652502	0.475616	0.72739	0.838525	0.0387922	0.422507	0.245469	0.177038	0.206677	0.383715
ENSG00000080503	SMARCA2	49.8645	50.9464	54.4632	54.8396	0.970724	0.978371	0.996629	0.992159	0.974036	0.97983	-0.132149	-0.102364	-0.00958551	-0.0927783	0.122564	0.0297852
ENSG00000080546	SESN1	3.06832	8.76676	3.11002	11.3378	0.00176087	0.537707	0.00176087	0.00176087	0.991117	0.00176087	-1.39594	-0.308937	-1.38412	1.07518	0.0118213	1.087
ENSG00000080561	MID2	0.583877	0.313289	0.468577	0.761482	0.9203	0.350788	0.778785	0.602133	0.943283	0.807167	-0.0959053	-0.255497	-0.161763	-0.0937341	-0.0658577	-0.159592
ENSG00000080603	SRCAP	39.6768	35.7289	42.7578	36.7074	0.955014	0.983597	0.840816	0.901848	0.957241	0.7285	0.106635	-0.0369394	0.20953	-0.246469	0.102895	-0.143574
ENSG00000080608	KIAA0020	57.5725	39.7457	57.8815	50.962	0.864702	0.582676	0.855847	0.255993	0.995335	0.247834	0.169689	-0.34333	0.177153	-0.520483	0.00746386	-0.513019
ENSG00000080644	CHRNA3	0.524064	0.320463	0.38606	0.390781	0.956501	0.972569	0.997207	0.885068	0.954061	0.9751	0.0782665	-0.0430693	-0.00285166	-0.0402176	-0.0811182	-0.121336
ENSG00000080802	CNOT4	16.8769	20.698	20.7944	15.6606	0.947458	0.760871	0.476717	0.827365	0.608019	0.995976	0.0960875	0.362031	0.368145	-0.00611425	0.272058	0.265943
ENSG00000080815	PSEN1	25.5936	36.5223	27.4949	29.6452	0.827665	0.747308	0.94817	0.395391	0.950807	0.565208	-0.197653	0.283707	-0.101521	0.385228	0.0961318	0.48136
ENSG00000080819	CPOX	6.64453	14.7131	6.30423	11.3623	0.386329	0.719076	0.25134	0.0973203	0.983975	0.0544748	-0.628309	0.322811	-0.68625	1.00906	-0.0579411	0.95112
ENSG00000080822	CLDND1	30.9978	20.3325	29.5115	26.1015	0.869558	0.878906	0.933756	0.677877	0.978371	0.73229	0.231723	-0.331502	0.165231	-0.496734	-0.0664914	-0.563225
ENSG00000080823	MOK	10.4357	13.2335	9.46019	10.3636	0.996822	0.922877	0.97652	0.928775	0.975036	0.861414	0.00838883	0.301149	-0.109468	0.410616	-0.117857	0.29276
ENSG00000080824	HSP90AA1	1107.01	1082.84	1130.84	1058.95	0.909691	0.969892	0.804939	0.97119	0.971482	0.906379	0.0639157	0.0321256	0.0945874	-0.0624618	0.0306717	-0.0317901
ENSG00000080839	RBL1	4.93644	4.46478	5.45422	5.2941	0.958812	0.808687	0.986234	0.893697	0.91738	0.713997	-0.0725346	-0.174129	0.0313274	-0.205456	0.103862	-0.101594
ENSG00000080845	DLGAP4	44.5523	31.0789	52.7698	19.5279	0.0114792	0.668386	0.0365309	0.775666	0.91024	0.690552	1.11264	0.619704	1.34717	-0.727469	0.234528	-0.492941
ENSG00000080986	NDC80	18.1654	15.4227	18.3555	17.0295	0.889518	0.776572	0.861298	0.480343	0.98902	0.447373	0.0836444	-0.127269	0.097181	-0.22445	0.0135366	-0.210914
ENSG00000081014	AP4E1	3.82664	4.51405	4.72376	3.77836	0.989042	0.583521	0.51673	0.708008	0.637062	0.968551	0.0120041	0.172895	0.218608	-0.0457134	0.206604	0.160891
ENSG00000081019	RSBN1	11.212	13.9723	11.0726	16.4252	0.77892	0.94893	0.765045	0.920169	0.995352	0.912258	-0.479831	-0.206108	-0.495134	0.289026	-0.0153028	0.273723
ENSG00000081026	MAGI3	5.20739	10.2783	5.27691	5.15448	0.99319	0.457372	0.9884	0.462042	0.99087	0.47387	0.01063	0.779192	0.0244791	0.754713	0.0138491	0.768562
ENSG00000081041	CXCL2	0.116627	1.62385	2.31252	0.227429	1	0.00582385	0.00324853	0.634524	0.633341	0.694899	-0.0736124	0.702144	0.953152	-0.251008	1.02676	0.775756
ENSG00000081052	COL4A4	0.533103	0.833288	0.552788	0.323435	0.197724	0.02647	0.169805	0.503847	0.983143	0.57071	0.124646	0.286218	0.135814	0.150404	0.011168	0.161572
ENSG00000081059	TCF7	0.418693	0.559586	0.0904971	0.541026	0.858961	0.991949	0.00176087	0.893061	0.00176087	0.31594	-0.0711835	0.0104993	-0.281565	0.292064	-0.210382	0.0816828
ENSG00000081087	OSTM1	37.1999	32.4593	32.3509	35.9836	0.984755	0.936624	0.941473	0.899144	0.908678	0.997168	0.0454733	-0.140483	-0.145029	0.0045455	-0.190502	-0.185957
ENSG00000081154	PCNP	152.747	148.457	167.55	134.165	0.730463	0.81657	0.330366	0.977224	0.843928	0.742358	0.184556	0.143995	0.316355	-0.17236	0.131799	-0.0405602
ENSG00000081177	EXD2	8.64536	11.5128	10.885	12.4772	0.610302	0.964218	0.929198	0.683798	0.816887	0.977469	-0.443558	-0.099456	-0.16809	0.0686341	0.275468	0.344102
ENSG00000081181	ARG2	0.746844	0.512957	0.698673	0.876003	0.983597	0.929129	0.976374	0.964983	0.991807	0.969892	-0.0662902	-0.194679	-0.091815	-0.102864	-0.0255248	-0.128389
ENSG00000081307	UBA5	75.3527	81.0195	80.9282	75.2886	0.999363	0.958377	0.951179	0.956342	0.949194	0.998981	0.00119602	0.103195	0.101607	0.00158746	0.100411	0.101999
ENSG00000081320	STK17B	3.54051	3.61467	3.01004	3.36806	0.978403	0.961961	0.932137	0.989042	0.881704	0.828117	0.045618	0.0648004	-0.0995787	0.164379	-0.145197	0.0191824
ENSG00000081377	CDC14B	4.41559	6.47228	3.90707	3.34978	0.719677	0.573653	0.891486	0.741457	0.897655	0.655262	0.262102	0.663271	0.142963	0.520308	-0.119139	0.401168
ENSG00000081386	ZNF510	1.97246	1.06793	1.52879	1.74059	0.948034	0.263187	0.921044	0.299749	0.801881	0.444968	0.0867668	-0.286	-0.0840923	-0.201908	-0.170859	-0.372767
ENSG00000081692	JMJD4	31.4935	39.6605	33.2919	36.085	0.758133	0.87042	0.911455	0.441227	0.955033	0.641399	-0.185342	0.129457	-0.109886	0.239343	0.075456	0.314799
ENSG00000081721	DUSP12	32.5965	28.2197	30.7123	30.4609	0.894682	0.913812	0.990826	0.742343	0.915428	0.897727	0.0919231	-0.103214	0.0111302	-0.114344	-0.0807929	-0.195137
ENSG00000081760	AACS	15.4692	23.0992	14.0905	17.9031	0.904914	0.721905	0.677986	0.663891	0.962341	0.348482	-0.18818	0.334648	-0.306784	0.641432	-0.118604	0.522828
ENSG00000081791	KIAA0141	31.144	23.1656	28.3301	29.9224	0.969871	0.433127	0.949611	0.314844	0.872956	0.603497	0.0541786	-0.343116	-0.0738189	-0.269297	-0.127997	-0.397295
ENSG00000081870	HSPB11	81.8692	58.8243	82.8888	70.0549	0.747925	0.806294	0.712941	0.51211	0.990414	0.487905	0.219045	-0.244449	0.236478	-0.480926	0.0174331	-0.463493
ENSG00000081913	PHLPP1	8.62495	8.23258	7.92671	9.20388	0.980359	0.94699	0.923673	0.98438	0.976185	0.985361	-0.0765424	-0.130828	-0.174611	0.0437824	-0.0980685	-0.0542861
ENSG00000082014	SMARCD3	5.61966	5.95455	4.93494	5.45627	0.987451	0.962891	0.946561	0.978474	0.920049	0.862601	0.0312725	0.0933262	-0.104571	0.197897	-0.135843	0.0620537
ENSG00000082068	WDR70	68.3159	86.6359	71.3562	70.7712	0.973213	0.795108	0.992284	0.748049	0.963983	0.80164	-0.0495166	0.284524	0.0115513	0.272972	0.061068	0.33404
ENSG00000082146	STRADB	9.87767	46.2623	10.6364	34.0324	0.00176087	0.643272	0.00324853	0.00176087	0.972684	0.00176087	-1.60104	0.421602	-1.51171	1.93331	0.0893337	2.02264
ENSG00000082153	BZW1	419.005	398.602	419.647	353.04	0.482187	0.702734	0.489892	0.936021	0.997476	0.934844	0.245856	0.174188	0.248054	-0.0738661	0.00219832	-0.0716677
ENSG00000082212	ME2	49.9761	47.9496	47.1789	45.2873	0.925527	0.976794	0.978371	0.981378	0.964604	0.990826	0.136396	0.0790204	0.0565867	0.0224337	-0.0798089	-0.0573753
ENSG00000082213	C5orf22	39.1397	40.3886	39.5286	40.9733	0.966257	0.990145	0.972587	0.980977	0.991291	0.985622	-0.0629093	-0.0197643	-0.0493353	0.0295711	0.013574	0.043145
ENSG00000082258	CCNT2	3.76493	0.923484	3.51461	1.887	0.343491	0.106119	0.348427	0.00582385	0.982307	0.00324853	0.568646	-0.410968	0.504602	-0.91557	-0.0640442	-0.979614
ENSG00000082269	FAM135A	1.93266	1.89508	1.87914	1.80197	0.96272	0.982285	0.98152	0.990303	0.984381	0.99484	0.0487583	0.0349058	0.0289897	0.00591612	-0.0197686	-0.0138525
ENSG00000082438	COBLL1	7.86105	20.8348	7.16302	8.0602	0.986229	0.272858	0.908467	0.251818	0.920595	0.170147	-0.0288458	1.18258	-0.134764	1.31734	-0.105918	1.21142
ENSG00000082458	DLG3	11.222	7.10983	9.22426	7.22056	0.32695	0.992317	0.737307	0.368281	0.80164	0.732158	0.520014	-0.0174302	0.283694	-0.301124	-0.23632	-0.537444
ENSG00000082497	SERTAD4	12.5117	10.7492	10.2037	8.82331	0.295056	0.754376	0.823271	0.826815	0.649506	0.970779	0.423075	0.236265	0.173177	0.0630881	-0.249898	-0.18681
ENSG00000082512	TRAF5	2.99609	3.61968	2.8367	3.26884	0.944161	0.930514	0.895227	0.74401	0.973016	0.693338	-0.0766859	0.0930026	-0.123462	0.216465	-0.0467764	0.169689
ENSG00000082515	MRPL22	113.439	121.376	125.279	119.72	0.934534	0.989142	0.952135	0.92542	0.778931	0.976274	-0.0764355	0.0194955	0.0644282	-0.0449326	0.140864	0.0959311
ENSG00000082516	GEMIN5	36.9378	40.8233	36.6734	42.5741	0.812575	0.977944	0.830121	0.892295	0.993509	0.901185	-0.195034	-0.0578097	-0.204864	0.147054	-0.00982977	0.137225
ENSG00000082641	NFE2L1	105.415	135.268	97.7506	116.362	0.912472	0.882535	0.760301	0.736215	0.945354	0.621245	-0.140011	0.213789	-0.246809	0.460598	-0.106798	0.3538
ENSG00000082701	GSK3B	51.6763	70.4802	56.6054	39.0414	0.569575	0.245058	0.331748	0.661422	0.929559	0.786683	0.387205	0.820507	0.513954	0.306553	0.126748	0.433302
ENSG00000082781	ITGB5	170.061	180.971	196.966	181.803	0.923845	0.994368	0.890794	0.934294	0.69153	0.886391	-0.0952402	-0.00654531	0.114362	-0.120907	0.209602	0.0886949
ENSG00000082805	ERC1	55.8532	60.9423	44.4697	63.6299	0.952172	0.983261	0.627694	0.967995	0.855476	0.630504	-0.181956	-0.0603233	-0.498063	0.43774	-0.316106	0.121633
ENSG00000082898	XPO1	267.067	223.484	240.806	192.015	0.849493	0.956208	0.912427	0.947795	0.974686	0.981418	0.471797	0.216857	0.323636	-0.106779	-0.148161	-0.25494
ENSG00000082996	RNF13	138.521	93.3971	152.593	107.449	0.808679	0.961961	0.670853	0.763881	0.960197	0.683304	0.360527	-0.198241	0.498216	-0.696458	0.137689	-0.558768
ENSG00000083093	PALB2	7.81418	15.7707	10.7484	9.35964	0.903713	0.451422	0.95932	0.257421	0.869196	0.821908	-0.210977	0.645583	0.166399	0.479184	0.377377	0.856561
ENSG00000083097	DOPEY1	0.518537	1.06946	0.383676	0.806235	0.602764	0.821005	0.236641	0.3391	0.830651	0.0919062	-0.15605	0.129349	-0.235448	0.364797	-0.0793978	0.285399
ENSG00000083099	LYRM2	12.1397	12.8432	11.5356	13.2687	0.949158	0.987195	0.902287	0.978474	0.978383	0.957241	-0.110826	-0.0407751	-0.173818	0.133043	-0.0629927	0.0700506
ENSG00000083123	BCKDHB	4.6485	4.44749	4.3214	4.80385	0.985622	0.963688	0.931371	0.981782	0.965866	0.986229	-0.0333225	-0.0776137	-0.106107	0.0284935	-0.0727848	-0.0442913
ENSG00000083168	KAT6A	10.9158	8.42359	12.3896	9.51813	0.929094	0.945124	0.782863	0.78898	0.938162	0.627981	0.16523	-0.144054	0.32112	-0.465174	0.155889	-0.309285
ENSG00000083223	ZCCHC6	9.50608	10.2663	10.5005	9.36551	0.991044	0.935086	0.916659	0.956403	0.941683	0.988666	0.017734	0.110038	0.137323	-0.0272857	0.119589	0.0923037
ENSG00000083312	TNPO1	171.483	165.839	178.728	140.56	0.636693	0.7285	0.517934	0.97855	0.974686	0.94059	0.283225	0.235509	0.342251	-0.106742	0.0590257	-0.0477163
ENSG00000083444	PLOD1	46.0038	100.116	48.1297	58.4396	0.187882	0.484036	0.291993	0.227545	0.94234	0.268684	-0.332345	0.756643	-0.269829	1.02647	0.062517	1.08899
ENSG00000083454	P2RX5	60.9792	50.872	59.0927	58.8609	0.981782	0.866202	0.996629	0.808605	0.983845	0.849128	0.0493598	-0.203012	0.00548433	-0.208496	-0.0438754	-0.252372
ENSG00000083457	ITGAE	34.1582	36.5282	31.4543	35.9631	0.969335	0.990821	0.833151	0.96976	0.942554	0.885265	-0.0702749	0.021317	-0.182406	0.203723	-0.112131	0.0915919
ENSG00000083520	DIS3	34.7677	32.8235	36.2417	32.7509	0.946561	0.997207	0.896801	0.929455	0.962782	0.852517	0.0813886	0.00301087	0.138096	-0.135085	0.0567077	-0.0783777
ENSG00000083535	PIBF1	18.5067	6.97782	14.0286	7.87489	0.401503	0.97978	0.652968	0.534035	0.903182	0.685675	1.05426	-0.1374	0.698812	-0.836211	-0.355447	-1.19166
ENSG00000083544	TDRD3	13.4512	17.5642	14.8032	12.9146	0.971222	0.234158	0.780903	0.365203	0.885587	0.678743	0.0509936	0.391491	0.172011	0.21948	0.121017	0.340497
ENSG00000083635	NUFIP1	6.91039	7.6094	6.4193	7.17259	0.963477	0.919266	0.765257	0.807645	0.88854	0.530237	-0.0418406	0.0671172	-0.123629	0.190746	-0.0817883	0.108958
ENSG00000083642	PDS5B	16.3415	13.9997	15.2147	15.0187	0.946561	0.958719	0.99223	0.844416	0.964157	0.950351	0.107991	-0.089076	0.0165202	-0.105596	-0.0914706	-0.197067
ENSG00000083720	OXCT1	85.2868	59.5073	76.5881	54.0315	0.183309	0.854414	0.110679	0.348427	0.892984	0.408747	0.639525	0.13452	0.488073	-0.353553	-0.151453	-0.505006
ENSG00000083750	RRAGB	15.4944	13.2907	14.0983	17.1638	0.973159	0.888607	0.908678	0.96516	0.977318	0.985426	-0.13149	-0.325729	-0.251475	-0.0742539	-0.119985	-0.194239
ENSG00000083799	CYLD	8.60043	11.9855	12.1289	10.246	0.834288	0.842829	0.842847	0.454522	0.486271	0.992487	-0.208188	0.191621	0.206339	-0.0147173	0.414526	0.399809
ENSG00000083807	SLC27A5	28.2436	26.3511	25.1328	25.3686	0.899937	0.980607	0.992831	0.958415	0.877743	0.976767	0.144108	0.0508831	-0.0124837	0.0633668	-0.156592	-0.0932252
ENSG00000083812	ZNF324	4.07876	5.26007	4.34827	4.12316	0.990958	0.424174	0.955465	0.367797	0.9394	0.589568	-0.0104993	0.245707	0.0520871	0.19362	0.0625864	0.256206
ENSG00000083817	ZNF416	3.25361	2.08828	2.80831	3.08865	0.966635	0.250306	0.915879	0.148811	0.815494	0.500827	0.0460261	-0.315789	-0.0817531	-0.234036	-0.127779	-0.361815
ENSG00000083828	ZNF586	5.37766	4.21291	4.7281	5.31907	0.992877	0.747547	0.920049	0.744819	0.913016	0.935086	0.011503	-0.236391	-0.121461	-0.11493	-0.132964	-0.247894
ENSG00000083838	ZNF446	2.77086	7.0291	2.50486	3.82863	0.793129	0.314483	0.718134	0.0734495	0.976634	0.100624	-0.288907	0.631425	-0.371675	1.0031	-0.0827671	0.920333
ENSG00000083842	ZNF8	2.94714	4.01831	2.31092	2.42751	0.912942	0.590156	0.986378	0.792649	0.875721	0.529175	0.160099	0.442863	-0.0384998	0.481363	-0.198599	0.282764
ENSG00000083844	ZNF264	5.27122	5.76529	6.29207	6.66542	0.911261	0.960361	0.990145	0.971482	0.956236	0.980607	-0.253072	-0.15823	-0.0635374	-0.0946925	0.189535	0.0948424
ENSG00000083845	RPS5	1622.65	1536.49	1710.85	1646.54	0.979965	0.771031	0.921914	0.851835	0.862433	0.536561	-0.0210599	-0.0996738	0.0552099	-0.154884	0.0762699	-0.0786139
ENSG00000083857	FAT1	57.0262	36.9072	54.4376	36.4597	0.766182	0.995271	0.77662	0.775666	0.989889	0.781426	0.618008	0.0166896	0.553309	-0.536619	-0.0646988	-0.601318
ENSG00000083896	YTHDC1	53.7818	47.0558	36.801	43.1262	0.954972	0.987097	0.955173	0.977469	0.759408	0.912872	0.305829	0.120458	-0.217871	0.33833	-0.523701	-0.185371
ENSG00000083937	CHMP2B	44.9564	47.8195	49.359	52.1422	0.620046	0.895195	0.931716	0.944529	0.829516	0.977944	-0.205432	-0.120043	-0.0761364	-0.0439066	0.129295	0.0853887
ENSG00000084070	SMAP2	17.2155	18.2725	14.8428	15.5837	0.876711	0.671867	0.963383	0.941368	0.744983	0.48383	0.128032	0.205285	-0.0621067	0.267392	-0.190139	0.0772535
ENSG00000084072	PPIE	38.3928	45.9861	41.9523	47.3681	0.351409	0.976498	0.710608	0.558424	0.839314	0.853296	-0.289481	-0.0409626	-0.16764	0.126678	0.121841	0.248518
ENSG00000084073	ZMPSTE24	51.9594	60.9488	53.1202	62.113	0.176608	0.976138	0.395391	0.284636	0.975253	0.495777	-0.248743	-0.026438	-0.218036	0.191598	0.0307068	0.222305
ENSG00000084090	STARD7	65.4935	53.7485	66.9316	60.1236	0.881907	0.864898	0.827408	0.585197	0.981418	0.512321	0.119607	-0.156208	0.150024	-0.306233	0.0304169	-0.275816
ENSG00000084092	NOA1	9.92334	8.77668	9.82327	9.77712	0.990414	0.912872	0.995743	0.889183	0.992831	0.911314	0.0178016	-0.128074	0.00564232	-0.133716	-0.0121593	-0.145876
ENSG00000084093	REST	4.02279	3.54442	2.58218	3.30244	0.890656	0.978383	0.741495	0.964604	0.568081	0.740073	0.183776	0.0643802	-0.210622	0.275002	-0.394398	-0.119395
ENSG00000084112	SSH1	9.30943	6.67267	8.53091	8.39283	0.891486	0.692141	0.990092	0.311832	0.909393	0.600276	0.121938	-0.26104	0.0190416	-0.280082	-0.102896	-0.382978
ENSG00000084234	APLP2	57.0031	56.9091	56.6693	55.6956	0.991044	0.990145	0.99319	0.99877	0.997108	0.997207	0.0323295	0.0300292	0.0241445	0.00588473	-0.00818498	-0.00230024
ENSG00000084444	KIAA1467	1.80192	1.67228	1.48554	2.18435	0.768983	0.627981	0.277244	0.964604	0.783167	0.916499	-0.138275	-0.188327	-0.263621	0.0752939	-0.125346	-0.0500521
ENSG00000084463	WBP11	115.248	91.113	121.358	80.915	0.00176087	0.577783	0.00176087	0.0806338	0.872542	0.0125108	0.499858	0.167349	0.573146	-0.405797	0.073288	-0.332509
ENSG00000084623	EIF3I	327.418	405.307	353.302	354.561	0.772626	0.6556	0.993887	0.350654	0.798259	0.646283	-0.11423	0.191968	-0.0051031	0.197071	0.109126	0.306197
ENSG00000084636	COL16A1	5.60674	1.53784	6.24923	8.83162	0.907995	0.167371	0.946561	0.298284	0.984755	0.261331	-0.509899	-1.61431	-0.392918	-1.22139	0.116981	-1.10441
ENSG00000084652	TXLNA	10.8258	19.0953	9.49773	19.0443	0.00176087	0.995124	0.00176087	0.00176087	0.577933	0.00176087	-0.714381	0.00349208	-0.87208	0.875573	-0.1577	0.717873
ENSG00000084676	NCOA1	4.11482	3.98959	4.06586	3.74525	0.851907	0.930675	0.900663	0.975707	0.990092	0.984967	0.0899404	0.0600876	0.0783425	-0.018255	-0.0115978	-0.0298528
ENSG00000084693	AGBL5	19.3559	29.1486	21.3799	26.9789	0.117521	0.926984	0.449776	0.142348	0.874162	0.376766	-0.440368	0.104164	-0.309734	0.413899	0.130634	0.544533
ENSG00000084710	EFR3B	1.51815	1.02852	1.8744	1.41109	0.960906	0.618732	0.552528	0.475858	0.725283	0.131555	0.0445842	-0.17162	0.18374	-0.35536	0.139156	-0.216204
ENSG00000084731	KIF3C	2.64939	2.0838	3.78931	2.88717	0.977611	0.768983	0.851553	0.885533	0.795557	0.418225	-0.0719578	-0.259087	0.244392	-0.503479	0.31635	-0.187129
ENSG00000084733	RAB10	112.093	88.1782	112.963	95.2347	0.629131	0.935688	0.612438	0.595442	0.992317	0.585493	0.230667	-0.108693	0.241626	-0.350319	0.0109593	-0.33936
ENSG00000084754	HADHA	69.3732	80.4405	73.3884	71.8538	0.951642	0.744334	0.975935	0.591162	0.881073	0.806298	-0.0492897	0.158681	0.0296704	0.129011	0.0789601	0.207971
ENSG00000084764	MAPRE3	1.63435	2.16828	1.69644	1.65862	0.992487	0.806489	0.989042	0.81362	0.984848	0.824188	-0.00960222	0.188153	0.0148369	0.173316	0.0244391	0.197755
ENSG00000084774	CAD	64.8555	118.264	68.2049	70.5001	0.938082	0.533047	0.981477	0.448106	0.970658	0.494778	-0.116937	0.73015	-0.0464113	0.776561	0.0705255	0.847087
ENSG00000085063	CD59	234.972	190.193	233.936	181.827	0.0928766	0.950794	0.11332	0.343967	0.993509	0.375315	0.366368	0.0642071	0.360047	-0.29584	-0.00632104	-0.302161
ENSG00000085117	CD82	26.6368	24.789	26.0426	31.9995	0.711872	0.518934	0.63243	0.951051	0.985759	0.970797	-0.247643	-0.343873	-0.277893	-0.0659794	-0.0302502	-0.0962296
ENSG00000085185	BCORL1	5.88456	6.97621	5.68274	7.47243	0.240101	0.902222	0.157045	0.554226	0.968137	0.426631	-0.264704	-0.0776281	-0.302114	0.224485	-0.0374093	0.187076
ENSG00000085224	ATRX	21.1058	23.1477	19.3951	20.2186	0.9884	0.956208	0.986229	0.97978	0.978982	0.935603	0.0564871	0.178659	-0.0544875	0.233146	-0.110975	0.122171
ENSG00000085231	TAF9	180.084	243.142	185.093	154.615	0.567269	0.00582385	0.456896	0.140821	0.972366	0.203935	0.217382	0.646395	0.256533	0.389862	0.0391514	0.429014
ENSG00000085274	MYNN	6.23048	9.5745	6.79099	7.42967	0.655756	0.525173	0.887615	0.121553	0.895701	0.271282	-0.196231	0.295671	-0.101182	0.396852	0.0950491	0.491901
ENSG00000085276	MECOM	5.58825	5.10208	2.33519	6.25483	0.975884	0.963383	0.283655	0.980607	0.156229	0.537813	-0.121471	-0.216997	-0.929143	0.712146	-0.807672	-0.0955256
ENSG00000085365	SCAMP1	12.581	10.2106	12.4132	12.5775	0.999581	0.727774	0.991796	0.703378	0.99105	0.674629	0.000346344	-0.255609	-0.0163526	-0.239257	-0.016699	-0.255956
ENSG00000085377	PREP	39.3596	30.1046	40.7736	25.2186	0.00176087	0.643272	0.00176087	0.337522	0.960199	0.245058	0.603629	0.238187	0.652128	-0.413941	0.0484984	-0.365442
ENSG00000085382	HACE1	1.66545	1.72718	1.88239	1.41503	0.891587	0.82461	0.756745	0.983975	0.942576	0.965129	0.102092	0.126186	0.185047	-0.0588606	0.0829547	0.0240942
ENSG00000085415	SEH1L	46.9751	40.9738	51.6441	42.4604	0.858073	0.977121	0.58232	0.781127	0.87206	0.504033	0.139528	-0.0490636	0.270899	-0.319962	0.131371	-0.188591
ENSG00000085433	WDR47	4.79969	3.62977	6.03665	4.41053	0.969634	0.829605	0.762838	0.685815	0.858205	0.403758	0.0850253	-0.187368	0.326151	-0.513518	0.241125	-0.272393
ENSG00000085449	WDFY1	14.3525	5.85954	13.8136	5.97044	0.275545	0.994021	0.329568	0.244884	0.987451	0.308036	1.03678	-0.0202145	0.988435	-1.00865	-0.0483454	-1.05699
ENSG00000085465	OVGP1	0.125477	0.0420858	0.399102	0.34727	1	1	0.973468	1	0.222083	0.574148	-0.143197	-0.20094	0.0315107	-0.232451	0.174708	-0.0577432
ENSG00000085491	SLC25A24	20.5388	22.6988	19.7313	23.5782	0.496179	0.944608	0.283856	0.708008	0.942911	0.502116	-0.182504	-0.0504738	-0.23514	0.184666	-0.0526362	0.13203
ENSG00000085511	MAP3K4	11.7274	7.8368	6.758	6.44	0.774434	0.951495	0.989289	0.885931	0.810574	0.968512	0.701743	0.220946	0.0533585	0.167588	-0.648385	-0.480797
ENSG00000085552	IGSF9	0.366337	0.735781	0.409611	0.623211	0.323405	0.884919	0.499195	0.10336	0.9528	0.206788	-0.148678	0.0606189	-0.122534	0.183152	0.0261447	0.209297
ENSG00000085563	ABCB1	14.1747	10.0262	15.4963	8.27219	0.387003	0.934563	0.302617	0.736215	0.959837	0.685643	0.654995	0.227437	0.768306	-0.540869	0.113311	-0.427558
ENSG00000085644	ZNF213	10.1872	11.9871	9.69778	12.4159	0.69153	0.978782	0.552951	0.785311	0.970588	0.659595	-0.242294	-0.043564	-0.301426	0.257862	-0.0591319	0.19873
ENSG00000085662	AKR1B1	194.35	175.235	213.953	173.719	0.705896	0.990385	0.314034	0.771274	0.796924	0.409638	0.160157	0.0123933	0.297447	-0.285054	0.13729	-0.147764
ENSG00000085719	CPNE3	64.0301	75.5205	66.5164	81.3617	0.711962	0.955465	0.759639	0.841537	0.982307	0.891445	-0.336261	-0.104807	-0.282935	0.178129	0.0533255	0.231454
ENSG00000085721	RRN3	20.4398	18.2012	18.5928	16.7861	0.589932	0.918714	0.869228	0.830929	0.87786	0.984874	0.256394	0.104775	0.132474	-0.027699	-0.12392	-0.151619
ENSG00000085733	CTTN	56.467	43.9047	59.8812	41.8966	0.0302512	0.947795	0.00931705	0.232127	0.91136	0.107511	0.413513	0.0645327	0.495392	-0.430859	0.0818786	-0.348981
ENSG00000085760	MTIF2	43.7708	39.3752	47.2276	46.0122	0.936609	0.585139	0.977469	0.756328	0.868654	0.485634	-0.0689735	-0.214635	0.0360664	-0.250701	0.10504	-0.145661
ENSG00000085788	DDHD2	40.5403	43.1547	52.4223	48.3724	0.95632	0.976767	0.982307	0.986213	0.910137	0.943542	-0.243803	-0.157757	0.111564	-0.269322	0.355368	0.086046
ENSG00000085832	EPS15	11.1495	13.6189	11.7938	9.80176	0.902537	0.405424	0.749215	0.757923	0.968707	0.819246	0.156006	0.404291	0.225018	0.179273	0.069012	0.248285
ENSG00000085840	ORC1	23.2983	19.6336	24.2185	19.4448	0.275232	0.988409	0.123296	0.329388	0.941885	0.149568	0.238413	0.0126459	0.289957	-0.277311	0.0515447	-0.225767
ENSG00000085871	MGST2	31.7389	45.9179	32.0875	34.1714	0.904207	0.126093	0.931539	0.0346294	0.990414	0.0426481	-0.100437	0.405715	-0.0856066	0.491322	0.0148299	0.506152
ENSG00000085872	CHERP	44.3638	57.7681	43.5483	63.6581	0.280999	0.921378	0.276878	0.531546	0.988519	0.504247	-0.501974	-0.135597	-0.527576	0.391978	-0.0256016	0.366377
ENSG00000085978	ATG16L1	14.7552	18.703	13.6791	13.5941	0.953637	0.76969	0.995956	0.776519	0.945851	0.695538	0.103609	0.40884	0.00784246	0.400997	-0.0957662	0.305231
ENSG00000085982	USP40	7.78011	16.1613	11.0632	7.48547	0.982307	0.483024	0.706224	0.508125	0.737347	0.876216	0.0441314	0.937076	0.461717	0.475359	0.417586	0.892945
ENSG00000085998	POMGNT1	111.186	126.524	110.303	104.691	0.970281	0.798388	0.974267	0.897064	0.994029	0.880653	0.085257	0.268599	0.073958	0.194641	-0.0112991	0.183342
ENSG00000085999	RAD54L	19.4846	17.964	14.2058	19.5006	0.999463	0.970797	0.692591	0.973159	0.70326	0.811234	-0.001074	-0.106976	-0.407867	0.300891	-0.406793	-0.105902
ENSG00000086015	MAST2	22.9885	21.1389	23.9122	22.516	0.978421	0.931573	0.891087	0.871546	0.94234	0.759535	0.0275407	-0.0834033	0.0799079	-0.163311	0.0523672	-0.110944
ENSG00000086061	DNAJA1	337.482	289.88	360.351	288.705	0.269272	0.993006	0.0426481	0.31594	0.808501	0.0689734	0.223779	0.00581947	0.317832	-0.312013	0.0940528	-0.21796
ENSG00000086062	B4GALT1	66.0875	101.423	92.7686	79.3538	0.566834	0.272278	0.598193	0.0171566	0.0786989	0.8369	-0.25682	0.346275	0.220199	0.126076	0.477019	0.603095
ENSG00000086065	CHMP5	39.0628	48.6068	39.7393	37.259	0.929172	0.0544748	0.874854	0.152395	0.981477	0.209934	0.0648086	0.366308	0.088383	0.277925	0.0235744	0.301499
ENSG00000086102	NFX1	30.2643	31.0211	23.4984	27.7322	0.807167	0.731016	0.330366	0.978474	0.14405	0.153915	0.117913	0.151362	-0.221619	0.372981	-0.339532	0.0334495
ENSG00000086189	DIMT1	42.3501	36.5768	41.0418	32.4333	0.506035	0.891445	0.583199	0.847754	0.981418	0.898468	0.365133	0.163929	0.321934	-0.158005	-0.0431989	-0.201204
ENSG00000086200	IPO11	43.9493	41.1781	44.3593	39.4264	0.946377	0.981418	0.946561	0.974686	0.995369	0.971637	0.149492	0.0597493	0.162308	-0.102559	0.0128159	-0.0897431
ENSG00000086232	EIF2AK1	249.464	116.066	265.728	95.4695	0.00176087	0.795557	0.00176087	0.00324853	0.94676	0.00176087	1.36733	0.276571	1.45775	-1.18117	0.0904162	-1.09076
ENSG00000086289	EPDR1	21.8645	21.4978	19.6762	25.8247	0.694328	0.5807	0.250016	0.988409	0.8664	0.886589	-0.2215	-0.24384	-0.360254	0.116414	-0.138754	-0.0223404
ENSG00000086300	SNX10	4.22123	5.94871	5.55901	3.3772	0.813086	0.168898	0.27841	0.545676	0.690552	0.967199	0.210345	0.563866	0.491342	0.0725234	0.280997	0.353521
ENSG00000086475	SEPHS1	116.303	115.312	125.012	128.984	0.796179	0.80205	0.976274	0.991137	0.909658	0.906048	-0.146904	-0.15904	-0.0444258	-0.114614	0.102478	-0.0121361
ENSG00000086504	MRPL28	318.918	348.972	321.669	337.318	0.886393	0.958097	0.917038	0.774072	0.989056	0.807339	-0.0804333	0.048718	-0.0681188	0.116837	0.0123145	0.129151
ENSG00000086544	ITPKC	4.67646	5.62622	6.7204	4.46864	0.986275	0.861055	0.670934	0.922381	0.77438	0.928775	0.0456209	0.237506	0.430932	-0.193426	0.385311	0.191885
ENSG00000086589	RBM22	49.2162	55.8099	58.8173	49.1998	0.999581	0.78055	0.615407	0.82082	0.673458	0.959076	0.000462041	0.175178	0.248344	-0.0731652	0.247882	0.174716
ENSG00000086598	TMED2	310.79	329.492	304.205	332.767	0.928948	0.991807	0.904344	0.954105	0.985426	0.938817	-0.0979629	-0.0141833	-0.128659	0.114476	-0.0306965	0.0837797
ENSG00000086666	ZFAND6	25.6619	34.6017	25.9801	25.3714	0.990125	0.325038	0.98152	0.364489	0.989159	0.387327	0.015231	0.419241	0.0317319	0.38751	0.0165009	0.40401
ENSG00000086712	TXLNG	30.2967	37.2849	31.4162	31.8719	0.970351	0.795682	0.990249	0.689048	0.979512	0.763647	-0.0687022	0.213886	-0.0195412	0.233427	0.0491609	0.282588
ENSG00000086717	PPEF1	16.2439	8.71118	9.86905	7.19902	0.199464	0.913238	0.639729	0.442696	0.484408	0.913403	0.987862	0.219565	0.367652	-0.148087	-0.62021	-0.768297
ENSG00000086758	HUWE1	150.298	170.648	155.783	135.319	0.921618	0.720263	0.867436	0.902841	0.981418	0.94517	0.149366	0.330302	0.200411	0.129892	0.0510448	0.180937
ENSG00000086827	ZW10	12.1783	12.5779	12.782	14.3245	0.453719	0.638219	0.689426	0.967415	0.934153	0.984193	-0.203354	-0.163256	-0.143197	-0.0200586	0.0601569	0.0400983
ENSG00000086848	ALG9	42.2671	49.6232	45.2708	39.8967	0.961635	0.833751	0.844961	0.886617	0.943633	0.952425	0.0793982	0.301183	0.174113	0.12707	0.0947144	0.221785
ENSG00000087008	ACOX3	5.91562	8.32272	8.44755	9.20911	0.517733	0.972906	0.971815	0.783904	0.679851	0.994512	-0.501897	-0.118849	-0.101507	-0.0173415	0.40039	0.383049
ENSG00000087053	MTMR2	98.9626	75.7684	99.9029	75.1307	0.0777019	0.990821	0.0684135	0.197388	0.989767	0.161273	0.388444	0.0118789	0.401818	-0.389939	0.0133741	-0.376565
ENSG00000087074	PPP1R15A	15.2937	19.8052	25.6053	12.8386	0.437208	0.00176087	0.00176087	0.093825	0.00176087	0.0777019	0.220892	0.555317	0.89559	-0.340273	0.674699	0.334426
ENSG00000087077	TRIP6	84.3593	78.9309	88.1028	69.7133	0.163742	0.793585	0.051514	0.9203	0.919538	0.82058	0.268111	0.17445	0.329331	-0.154881	0.0612204	-0.0936609
ENSG00000087086	FTL	2795	1953.34	2901.65	2129.83	0.00324853	0.666936	0.00176087	0.00176087	0.923719	0.00176087	0.391788	-0.124673	0.445775	-0.570448	0.0539873	-0.516461
ENSG00000087087	SRRT	245.275	202.421	274.752	192.271	0.654172	0.977058	0.392648	0.78634	0.908987	0.559564	0.348046	0.0734729	0.510523	-0.43705	0.162477	-0.274573
ENSG00000087088	BAX	422.748	477.854	394.797	545.125	0.471384	0.87428	0.262287	0.896278	0.946846	0.767613	-0.365263	-0.189275	-0.463469	0.274194	-0.098206	0.175988
ENSG00000087095	NLK	4.59597	17.0474	4.20108	5.84997	0.879953	0.424974	0.810943	0.271875	0.980637	0.210431	-0.251102	1.27884	-0.340168	1.619	-0.0890653	1.52994
ENSG00000087111	PIGS	73.8213	72.6228	80.0116	73.6827	0.998772	0.991945	0.964157	0.991807	0.969871	0.954422	0.00263963	-0.0203471	0.115864	-0.136211	0.113225	-0.0229867
ENSG00000087152	ATXN7L3	61.4512	60.7671	58.0717	58.919	0.980607	0.987128	0.991807	0.99363	0.973213	0.98152	0.0587552	0.0431163	-0.0202068	0.0633231	-0.078962	-0.0156389
ENSG00000087157	PGS1	16.986	25.6028	16.0604	19.3624	0.749759	0.64011	0.572612	0.440532	0.946377	0.358002	-0.170138	0.369741	-0.242244	0.611985	-0.0721061	0.539879
ENSG00000087191	PSMC5	269.503	261.45	281.233	248.615	0.885187	0.950807	0.750556	0.97629	0.960898	0.903059	0.115495	0.0720564	0.176517	-0.10446	0.0610212	-0.043439
ENSG00000087206	UIMC1	28.0647	32.3979	25.1972	28.1815	0.996639	0.890749	0.903118	0.886993	0.911087	0.673991	-0.00559395	0.188656	-0.150206	0.338862	-0.144612	0.19425
ENSG00000087253	LPCAT2	15.9307	8.45035	19.0899	14.2417	0.945005	0.481867	0.708078	0.257652	0.841338	0.0987371	0.142729	-0.636151	0.37685	-1.013	0.23412	-0.778881
ENSG00000087258	GNAO1	4.71316	5.48967	3.72308	4.54503	0.98969	0.94893	0.932914	0.956405	0.892396	0.793129	0.0365922	0.194502	-0.193608	0.38811	-0.2302	0.15791
ENSG00000087263	OGFOD1	86.9484	87.1503	85.6985	101.85	0.831187	0.891744	0.778132	0.998377	0.991044	0.991807	-0.223461	-0.22019	-0.243877	0.0236875	-0.0204165	0.003271
ENSG00000087266	SH3BP2	9.41123	8.13615	10.4147	10.7905	0.942965	0.792372	0.987606	0.941744	0.966486	0.853633	-0.164618	-0.335563	-0.0430233	-0.29254	0.121595	-0.170945
ENSG00000087269	NOP14	55.4164	43.9428	57.4367	45.8754	0.173218	0.921618	0.072309	0.0465167	0.940753	0.00931705	0.262178	-0.0594458	0.312069	-0.371515	0.0498911	-0.321624
ENSG00000087274	ADD1	48.2623	56.005	45.6179	51.0541	0.974638	0.937927	0.927794	0.863517	0.976274	0.77455	-0.0779876	0.128713	-0.15596	0.284673	-0.0779727	0.206701
ENSG00000087299	L2HGDH	8.23134	16.0497	6.79946	8.72111	0.978421	0.492237	0.763658	0.426655	0.841077	0.22923	-0.0674592	0.751521	-0.284967	1.03649	-0.217508	0.81898
ENSG00000087301	TXNDC16	1.01011	0.853152	1.34866	1.04775	0.986234	0.839314	0.84951	0.87842	0.79112	0.541129	-0.0179284	-0.095188	0.135839	-0.231027	0.153768	-0.0772596
ENSG00000087302	C14orf166	200.647	223.292	209.65	198.012	0.982999	0.630015	0.866056	0.691908	0.916139	0.882488	0.0188823	0.17171	0.0815939	0.0901156	0.0627117	0.152827
ENSG00000087303	NID2	0.651819	0.262793	0.277195	0.412319	0.781974	0.896536	0.832129	0.682864	0.355275	1	0.136562	-0.0923161	-0.0831629	-0.00915322	-0.219724	-0.228878
ENSG00000087338	GMCL1	8.1365	11.0093	7.1105	9.21687	0.946561	0.849933	0.738104	0.673594	0.922584	0.259028	-0.146111	0.213873	-0.300068	0.513941	-0.153957	0.359984
ENSG00000087365	SF3B2	226.713	234.976	244.353	252.966	0.647271	0.8664	0.954318	0.960906	0.81988	0.957671	-0.156767	-0.105564	-0.0495778	-0.0559861	0.107189	0.0512026
ENSG00000087448	KLHDC5	9.31448	8.39822	8.92882	9.64929	0.973377	0.759604	0.900279	0.86602	0.966122	0.943407	-0.0420717	-0.163905	-0.0921044	-0.0718011	-0.0500326	-0.121834
ENSG00000087460	GNAS	1146.73	1113.5	1194.7	1100.75	0.932112	0.985383	0.763781	0.962543	0.933515	0.831056	0.058934	0.0165848	0.117956	-0.101371	0.0590218	-0.0423492
ENSG00000087470	DNM1L	82.0209	90.5057	80.8593	75.6654	0.948272	0.822131	0.961635	0.935842	0.991494	0.920989	0.113476	0.25227	0.0933916	0.158879	-0.0200846	0.138794
ENSG00000087502	ERGIC2	134.667	102.227	138.478	116.314	0.687221	0.838465	0.597924	0.484288	0.978383	0.42597	0.208044	-0.182892	0.247723	-0.430615	0.0396793	-0.390936
ENSG00000087510	TFAP2C	10.445	4.67577	5.59095	7.92556	0.771688	0.139653	0.431396	0.0694812	0.211241	0.731073	0.326346	-0.572214	-0.386868	-0.185346	-0.713214	-0.89856
ENSG00000087586	AURKA	98.1494	60.904	91.2814	70.5835	0.0163159	0.549397	0.105669	0.00176087	0.863402	0.00176087	0.46444	-0.20649	0.361948	-0.568438	-0.102492	-0.67093
ENSG00000087842	PIR	70.5891	72.6771	74.8075	47.7621	0.00324853	0.637823	0.00176087	0.980901	0.90679	0.98152	0.544706	0.585619	0.6262	-0.0405813	0.0814943	0.040913
ENSG00000087884	AAMDC	21.5368	34.5074	19.3027	21.0433	0.990826	0.671307	0.970779	0.692141	0.959425	0.612955	0.0305709	0.663842	-0.113311	0.777153	-0.143882	0.633271
ENSG00000087903	RFX2	3.07109	2.54519	2.82665	3.57527	0.94893	0.77173	0.903113	0.920434	0.978474	0.970335	-0.136746	-0.294701	-0.208019	-0.0866816	-0.0712737	-0.157955
ENSG00000087995	METTL2A	22.5758	19.6614	22.3651	21.186	0.903824	0.874447	0.9274	0.627083	0.989926	0.66953	0.0839844	-0.0981275	0.0715622	-0.16969	-0.0124222	-0.182112
ENSG00000088035	ALG6	23.594	22.1992	22.351	21.5786	0.797806	0.981418	0.961656	0.950807	0.919297	0.993494	0.118328	0.0374813	0.046503	-0.00902167	-0.0718246	-0.0808463
ENSG00000088038	CNOT3	36.0582	41.8592	37.4726	36.6243	0.984622	0.639388	0.978383	0.573834	0.957701	0.730195	-0.0213015	0.183371	0.0313428	0.152028	0.0526442	0.204672
ENSG00000088179	PTPN4	17.1485	3.9452	15.5903	6.8634	0.165601	0.603839	0.237559	0.00176087	0.953368	0.00176087	1.1113	-0.576135	0.988848	-1.56498	-0.122451	-1.68743
ENSG00000088205	DDX18	89.8808	83.5096	93.6039	77.3854	0.602764	0.872764	0.43426	0.890134	0.961037	0.75981	0.21089	0.107213	0.268196	-0.160983	0.0573061	-0.103677
ENSG00000088247	KHSRP	637.388	762.036	648.291	755.628	0.352967	0.990125	0.431796	0.314289	0.981477	0.39367	-0.244798	0.012151	-0.220404	0.232555	0.0243938	0.256949
ENSG00000088256	GNA11	107.118	81.2284	114.239	109.695	0.99105	0.775311	0.986229	0.797806	0.978421	0.69097	-0.0336755	-0.424417	0.0575296	-0.481946	0.0912051	-0.390741
ENSG00000088280	ASAP3	1.5867	1.48709	2.03976	1.92852	0.841537	0.87206	0.978589	0.981417	0.775449	0.842984	-0.131329	-0.171962	0.0402837	-0.212246	0.171613	-0.0406335
ENSG00000088298	EDEM2	18.1676	14.8327	17.507	19.4745	0.969978	0.76062	0.942576	0.863456	0.984381	0.903192	-0.0905851	-0.351358	-0.138633	-0.212725	-0.0480475	-0.260773
ENSG00000088305	DNMT3B	9.9099	6.86983	9.20562	7.08422	0.0372896	0.975812	0.144372	0.0496622	0.86602	0.167658	0.390727	-0.0344562	0.302788	-0.337244	-0.0879388	-0.425183
ENSG00000088325	TPX2	105.901	90.5768	102.272	92.9347	0.39367	0.960199	0.619914	0.228812	0.935762	0.455413	0.184701	-0.0362848	0.135344	-0.171629	-0.0493564	-0.220986
ENSG00000088356	PDRG1	18.1415	27.2324	16.0138	32.1995	0.00176087	0.45434	0.00176087	0.00582385	0.738346	0.00176087	-0.763804	-0.226407	-0.924873	0.698466	-0.161069	0.537397
ENSG00000088367	EPB41L1	24.6608	34.0309	27.3149	28.0543	0.871546	0.7888	0.987451	0.538389	0.946377	0.840578	-0.172851	0.261663	-0.0359373	0.297601	0.136914	0.434515
ENSG00000088387	DOCK9	53.8004	91.8783	53.3177	42.118	0.880787	0.563308	0.886672	0.734304	0.995976	0.727875	0.338908	1.08942	0.326374	0.763051	-0.0125343	0.750516
ENSG00000088448	ANKRD10	15.4603	24.2588	16.5084	17.1866	0.877448	0.261331	0.976062	0.0867002	0.950794	0.209934	-0.136021	0.452702	-0.0519189	0.504621	0.0841018	0.588723
ENSG00000088451	TGDS	7.03137	6.18495	5.93458	7.5341	0.949598	0.850568	0.605727	0.929559	0.781089	0.983844	-0.0781519	-0.220123	-0.264943	0.0448197	-0.186791	-0.141971
ENSG00000088682	COQ9	49.0739	59.6003	51.3997	54.223	0.922479	0.933862	0.970228	0.781656	0.977058	0.857301	-0.138574	0.131777	-0.0743288	0.206106	0.0642454	0.270351
ENSG00000088726	TMEM40	1.25743	0.339972	0.482293	1.90633	0.874854	0.0712334	0.315721	0.122827	0.522017	0.891212	-0.26208	-0.739323	-0.65414	-0.0851821	-0.392061	-0.477243
ENSG00000088727	KIF9	13.0637	18.5194	14.1077	19.2628	0.489608	0.983975	0.638797	0.654411	0.970691	0.770339	-0.497255	-0.051343	-0.400581	0.349238	0.0966743	0.445912
ENSG00000088756	ARHGAP28	3.51373	4.86442	3.5669	2.33153	0.566845	0.225503	0.509496	0.721905	0.991974	0.72022	0.348152	0.664261	0.361997	0.302264	0.0138455	0.316109
ENSG00000088766	CRLS1	34.6182	38.7369	36.743	37.083	0.923094	0.966605	0.991523	0.842135	0.941892	0.958812	-0.0939803	0.059795	-0.0126055	0.0724005	0.0813748	0.153775
ENSG00000088808	PPP1R13B	2.63984	2.59237	3.20084	4.22996	0.654974	0.6875	0.893564	0.992987	0.921389	0.926591	-0.425148	-0.439984	-0.260478	-0.179506	0.16467	-0.0148362
ENSG00000088812	ATRN	2.30201	2.54994	2.30172	2.249	0.982307	0.858702	0.983305	0.901037	0.99964	0.904695	0.0178875	0.0987242	0.0177903	0.0809339	-9.72559e-05	0.0808366
ENSG00000088826	SMOX	6.48333	10.8117	9.59803	13.4827	0.573363	0.922594	0.870656	0.606969	0.794075	0.964983	-0.867954	-0.273195	-0.416777	0.143582	0.451177	0.594759
ENSG00000088832	FKBP1A	504.241	827.516	535.187	477.896	0.978474	0.576011	0.941744	0.626873	0.976923	0.687909	0.0771026	0.789548	0.162703	0.626845	0.0856	0.712445
ENSG00000088833	NSFL1C	81.7734	38.3879	88.3446	32.1574	0.00176087	0.562281	0.00176087	0.00176087	0.823556	0.00176087	1.29429	0.241725	1.40324	-1.16152	0.108946	-1.05257
ENSG00000088836	SLC4A11	1.43103	3.59021	1.41792	1.24333	0.929559	0.492237	0.927157	0.571476	0.995506	0.565274	0.0811659	0.785427	0.0756428	0.709784	-0.00552311	0.704261
ENSG00000088876	ZNF343	4.74795	4.54421	5.99734	5.91395	0.947751	0.94224	0.995956	0.990884	0.950105	0.946343	-0.229949	-0.274179	0.0151223	-0.289301	0.245071	-0.0442302
ENSG00000088888	MAVS	13.2414	13.5183	12.1868	12.5654	0.9394	0.891174	0.973798	0.982063	0.864431	0.799402	0.0654501	0.0914252	-0.0379961	0.129421	-0.103446	0.0259751
ENSG00000088899	PROSAPIP1	0.994614	0.473579	0.918859	0.657331	0.398416	0.65644	0.565169	0.061101	0.960409	0.10336	0.172392	-0.103378	0.135427	-0.238805	-0.0369655	-0.27577
ENSG00000088930	XRN2	27.8536	31.0728	30.5535	29.7687	0.830844	0.923847	0.966061	0.613383	0.707317	0.979289	-0.0897011	0.0580391	0.0352066	0.0228325	0.124908	0.14774
ENSG00000088970	PLK1S1	8.91725	8.30308	8.05287	6.8963	0.457489	0.748109	0.744833	0.952633	0.882318	0.982287	0.295332	0.211798	0.17633	0.0354682	-0.119002	-0.0835338
ENSG00000088986	DYNLL1	485.712	495.319	505.84	512.328	0.876194	0.943608	0.983342	0.9751	0.921618	0.971834	-0.0766592	-0.0485171	-0.0183147	-0.0302025	0.0583446	0.0281421
ENSG00000088992	TESC	110.826	72.3477	142.024	91.0724	0.731818	0.800533	0.166283	0.458976	0.535981	0.165601	0.277674	-0.324065	0.629884	-0.953949	0.35221	-0.60174
ENSG00000089006	SNX5	47.6296	53.9334	48.0329	59.5961	0.437712	0.923898	0.460742	0.896358	0.992469	0.903096	-0.311638	-0.139129	-0.299962	0.160833	0.0116762	0.172509
ENSG00000089009	RPL6	7271.34	6850.08	7615.47	7095.31	0.977469	0.96516	0.887098	0.919913	0.94835	0.771892	0.0353457	-0.0507303	0.10204	-0.15277	0.0666939	-0.086076
ENSG00000089022	MAPKAPK5	28.2439	35.9363	29.9995	33.772	0.625095	0.937514	0.807436	0.411329	0.947458	0.638797	-0.242187	0.0847482	-0.160781	0.24553	0.0814052	0.326935
ENSG00000089048	ESF1	9.99616	10.7041	9.83935	8.84616	0.69361	0.380418	0.756642	0.887216	0.984619	0.835651	0.145388	0.22811	0.126406	0.101704	-0.0189828	0.0827215
ENSG00000089050	RBBP9	7.23625	17.8358	7.29434	13.0854	0.0125108	0.39367	0.0171566	0.00176087	0.993509	0.00176087	-0.707774	0.394954	-0.698729	1.09368	0.0090452	1.10273
ENSG00000089053	ANAPC5	96.7088	119.811	102.412	93.9019	0.966585	0.533281	0.795972	0.600276	0.900778	0.736611	0.0416193	0.345013	0.122656	0.222357	0.0810369	0.303394
ENSG00000089057	SLC23A2	4.82189	5.3853	5.39361	4.85851	0.994184	0.893947	0.930514	0.885317	0.924516	0.998064	-0.0077237	0.106761	0.108384	-0.00162242	0.116107	0.114485
ENSG00000089060	SLC24A6	15.3618	33.4448	18.1965	26.4842	0.0365309	0.78634	0.231262	0.063306	0.738998	0.218184	-0.714245	0.315412	-0.496057	0.811469	0.218189	1.02966
ENSG00000089063	TMEM230	70.4806	139.047	71.7249	63.7658	0.97217	0.571885	0.962594	0.632779	0.992648	0.62568	0.140257	1.10077	0.164814	0.935952	0.0245571	0.960509
ENSG00000089091	DZANK1	0.331442	1.72127	0.589721	0.598712	0.688586	0.530455	0.995516	0.197096	0.791291	0.614644	-0.156574	0.517998	-0.00500008	0.522998	0.151574	0.674573
ENSG00000089094	KDM2B	21.1263	24.4873	20.2212	23.6977	0.920522	0.985426	0.831565	0.904119	0.978629	0.82489	-0.152105	0.0436615	-0.209703	0.253364	-0.0575977	0.195766
ENSG00000089123	TASP1	1.88155	2.66735	2.20252	2.86547	0.509079	0.973642	0.783515	0.654842	0.921851	0.886631	-0.325946	-0.0599755	-0.211324	0.151349	0.114622	0.265971
ENSG00000089127	OAS1	24.2001	15.0611	22.6476	16.9776	0.450994	0.944471	0.610177	0.401948	0.958812	0.509496	0.465275	-0.153587	0.37715	-0.530737	-0.0881251	-0.618862
ENSG00000089154	GCN1L1	242.009	252.008	279.97	254.36	0.985108	0.995976	0.973288	0.987568	0.945124	0.967415	-0.0712368	-0.0132972	0.137371	-0.150668	0.208607	0.0579396
ENSG00000089157	RPLP0	3897.38	4463.69	4228.55	4035.97	0.967755	0.810479	0.954571	0.675793	0.873344	0.941885	-0.0503854	0.145253	0.067215	0.0780379	0.1176	0.195638
ENSG00000089159	PXN	87.4267	56.0657	87.7299	66.3975	0.376766	0.694899	0.408423	0.0400065	0.996629	0.063306	0.386762	-0.236257	0.391645	-0.627903	0.00488316	-0.623019
ENSG00000089177	KIF16B	3.77672	6.87136	3.21542	2.69423	0.77172	0.592498	0.923898	0.789974	0.961961	0.708008	0.299362	0.918267	0.151895	0.766372	-0.147467	0.618905
ENSG00000089195	TRMT6	22.7528	20.5931	23.9938	21.6223	0.933706	0.946561	0.783823	0.795256	0.928948	0.6084	0.0674423	-0.0642672	0.138018	-0.202285	0.0705758	-0.131709
ENSG00000089220	PEBP1	237.412	271.533	246.21	241.495	0.98152	0.672488	0.978474	0.602212	0.952649	0.754155	-0.0243967	0.167823	0.0276691	0.140154	0.0520658	0.192219
ENSG00000089234	BRAP	12.017	14.0655	11.9096	13.9239	0.62704	0.990414	0.582913	0.607328	0.990826	0.565731	-0.184016	0.0127722	-0.195113	0.207885	-0.0110967	0.196788
ENSG00000089248	ERP29	44.1659	26.6884	41.3066	31.7088	0.00176087	0.41124	0.0568633	0.00176087	0.858083	0.00176087	0.453702	-0.232658	0.361462	-0.594119	-0.0922407	-0.68636
ENSG00000089280	FUS	458.738	515.239	476.005	429.224	0.881073	0.52972	0.764714	0.765797	0.96067	0.887583	0.0955091	0.262394	0.148588	0.113805	0.0530791	0.166884
ENSG00000089289	IGBP1	38.8206	39.8044	39.3802	41.8855	0.817958	0.909691	0.874657	0.972023	0.983975	0.987652	-0.104447	-0.0700895	-0.0848037	0.0147142	0.0196432	0.0343574
ENSG00000089327	FXYD5	240.65	163.514	233.114	183.02	0.0796852	0.724402	0.160126	0.00176087	0.963775	0.00458804	0.391196	-0.160728	0.345679	-0.506407	-0.0455164	-0.551924
ENSG00000089335	ZNF302	1.36986	1.93255	1.61406	2.51438	0.230393	0.70195	0.512937	0.629131	0.924516	0.884884	-0.421839	-0.199063	-0.320907	0.121845	0.100932	0.222776
ENSG00000089351	GRAMD1A	42.5639	39.5926	52.9058	44.9889	0.961305	0.904632	0.74799	0.963796	0.590553	0.662296	-0.0764445	-0.175993	0.224639	-0.400632	0.301083	-0.0995486
ENSG00000089356	FXYD3	2.18974	1.62969	1.90822	1.30785	0.702163	0.966257	0.839997	0.936909	0.966551	0.976764	0.340967	0.133953	0.240618	-0.106665	-0.100349	-0.207014
ENSG00000089486	CDIP1	100.773	124.667	96.4838	116.439	0.942554	0.981782	0.914719	0.923182	0.987086	0.900123	-0.204683	0.0968965	-0.266186	0.363082	-0.061503	0.301579
ENSG00000089505	CMTM1	30.5491	9.87157	7.85222	8.27393	0.741057	0.978371	0.992487	0.79937	0.829675	0.978474	1.66363	0.208523	-0.0604674	0.26899	-1.7241	-1.45511
ENSG00000089597	GANAB	370.122	464.53	388.46	427.296	0.70837	0.912733	0.87096	0.536611	0.960361	0.706833	-0.206197	0.119997	-0.136798	0.256795	0.0693991	0.326194
ENSG00000089639	GMIP	4.41734	11.5249	5.50358	4.63899	0.98152	0.564589	0.835239	0.541364	0.813225	0.64358	-0.0489884	1.02658	0.176615	0.849967	0.225604	1.07557
ENSG00000089682	RBM41	8.55305	14.4965	8.1523	11.6967	0.417232	0.774603	0.348427	0.186072	0.9751	0.141633	-0.376168	0.268332	-0.432022	0.700353	-0.0558534	0.6445
ENSG00000089685	BIRC5	110.857	111.728	108.034	123.866	0.782426	0.855606	0.699639	0.99272	0.978403	0.97629	-0.157393	-0.146301	-0.193939	0.0476381	-0.0365465	0.0110916
ENSG00000089693	MLF2	310.746	72.1794	338.177	77.3119	0.00176087	0.967415	0.00176087	0.00176087	0.923898	0.00176087	1.97938	-0.0965187	2.10068	-2.1972	0.121294	-2.0759
ENSG00000089737	DDX24	115.23	125.138	112.071	92.9394	0.399089	0.717398	0.434495	0.945556	0.976844	0.896358	0.304263	0.421316	0.264853	0.156463	-0.0394097	0.117053
ENSG00000089775	ZBTB25	2.66553	1.07929	2.57373	1.49663	0.871391	0.966551	0.814606	0.823705	0.992738	0.761087	0.416076	-0.183367	0.387406	-0.570773	-0.0286698	-0.599443
ENSG00000089818	NECAP1	11.8079	16.5164	13.0469	15.5995	0.677059	0.974686	0.855878	0.55508	0.952425	0.765045	-0.350041	0.0732692	-0.226068	0.299337	0.123972	0.42331
ENSG00000089820	ARHGAP4	21.8522	22.3936	26.2608	21.8344	0.999581	0.992317	0.932112	0.992487	0.930964	0.951642	0.00107703	0.0334574	0.245757	-0.2123	0.24468	0.0323803
ENSG00000089876	DHX32	36.6529	34.1556	35.3847	31.1592	0.794313	0.932764	0.863131	0.953267	0.978474	0.978475	0.221167	0.12481	0.173039	-0.0482288	-0.0481287	-0.0963575
ENSG00000089902	RCOR1	22.7456	18.3571	23.5885	20.7012	0.974899	0.962197	0.957671	0.9028	0.98902	0.870191	0.124403	-0.157237	0.172727	-0.329964	0.0483236	-0.28164
ENSG00000089916	GPATCH2L	7.45915	8.59108	8.19215	7.72699	0.988946	0.963065	0.982307	0.94001	0.972497	0.983952	-0.0402829	0.122784	0.0673931	0.0553913	0.107676	0.163067
ENSG00000090006	LTBP4	105.985	131.621	111.055	93.9227	0.955444	0.808443	0.920595	0.920957	0.985177	0.946272	0.170887	0.478203	0.237081	0.241122	0.0661939	0.307316
ENSG00000090013	BLVRB	52.1509	31.4393	50.4721	38.1711	0.0483894	0.454044	0.0987371	0.00176087	0.966778	0.00176087	0.430827	-0.264613	0.385393	-0.650006	-0.0454348	-0.695441
ENSG00000090020	SLC9A1	9.23329	12.995	8.40925	10.1591	0.892477	0.770756	0.631768	0.697502	0.907966	0.601498	-0.114256	0.302445	-0.22417	0.526615	-0.109914	0.416701
ENSG00000090054	SPTLC1	69.5225	40.8821	65.4841	58.7195	0.718649	0.450349	0.868254	0.177447	0.955255	0.262287	0.236237	-0.501784	0.152388	-0.654172	-0.0838495	-0.738022
ENSG00000090060	PAPOLA	108.341	141.508	113.686	93.0526	0.796815	0.543359	0.673594	0.743432	0.969001	0.806298	0.215171	0.594333	0.283416	0.310917	0.0682453	0.379162
ENSG00000090061	CCNK	41.1271	46.1525	44.2376	36.1772	0.858929	0.657835	0.682393	0.876998	0.927767	0.974069	0.175883	0.334899	0.276355	0.0585442	0.100472	0.159016
ENSG00000090097	PCBP4	3.80261	3.47531	4.31111	4.6399	0.912083	0.85513	0.980062	0.973554	0.955336	0.901227	-0.19446	-0.278221	-0.0732677	-0.204953	0.121192	-0.0837613
ENSG00000090238	YPEL3	2.64439	4.5649	2.49028	3.5857	0.9028	0.902625	0.896801	0.586689	0.98816	0.617363	-0.266249	0.233035	-0.314933	0.547968	-0.0486837	0.499284
ENSG00000090263	MRPS33	118.098	110.908	122.791	101.359	0.482761	0.838525	0.278255	0.910803	0.946937	0.789752	0.216548	0.127484	0.27185	-0.144366	0.0553018	-0.0890644
ENSG00000090266	NDUFB2	222.232	223.664	239.3	223.005	0.995956	0.996629	0.932814	0.993776	0.922211	0.944168	-0.00496488	0.00421922	0.100871	-0.0966516	0.105836	0.00918411
ENSG00000090273	NUDC	248.91	192.313	245.808	208.911	0.1847	0.742276	0.242195	0.0215676	0.98348	0.0302512	0.250536	-0.118252	0.232588	-0.35084	-0.0179472	-0.368788
ENSG00000090316	MAEA	44.4726	45.2956	40.7496	39.4925	0.795305	0.819924	0.975614	0.988987	0.895928	0.899721	0.16353	0.188855	0.0430603	0.145795	-0.120469	0.0253256
ENSG00000090339	ICAM1	35.1816	140.432	217.872	26.5347	0.58314	0.00176087	0.00176087	0.00176087	0.00176087	0.038001	0.381871	2.31948	2.94587	-0.626391	2.564	1.93761
ENSG00000090372	STRN4	81.6055	60.7705	81.5254	75.5323	0.972826	0.852071	0.972497	0.761597	0.999581	0.744637	0.1088	-0.304711	0.107418	-0.412128	-0.00138287	-0.413511
ENSG00000090432	MUL1	14.4669	11.269	12.8368	12.0723	0.422894	0.893517	0.908496	0.170706	0.696129	0.6691	0.226711	-0.0847985	0.0763218	-0.16112	-0.150389	-0.311509
ENSG00000090447	TFAP4	32.1703	31.8032	26.2941	39.0826	0.70725	0.675728	0.194397	0.991949	0.708278	0.736705	-0.265785	-0.281368	-0.538026	0.256659	-0.272242	-0.0155831
ENSG00000090470	PDCD7	33.9595	21.4338	29.1787	30.1322	0.977058	0.773601	0.992487	0.61729	0.967154	0.803086	0.162353	-0.455429	-0.043459	-0.41197	-0.205812	-0.617782
ENSG00000090487	SPG21	139.955	146.967	137.646	129.813	0.837714	0.616119	0.893564	0.920287	0.981418	0.86602	0.106941	0.1765	0.0832816	0.0932185	-0.0236594	0.0695591
ENSG00000090520	DNAJB11	240.571	205.686	243.091	251.982	0.952425	0.684173	0.967415	0.787134	0.990145	0.76322	-0.0663192	-0.290322	-0.0514087	-0.238914	0.0149104	-0.224003
ENSG00000090530	LEPREL1	152.025	116.843	147.397	117.368	0.475458	0.995956	0.591577	0.406741	0.978492	0.530346	0.367748	-0.0063592	0.323735	-0.330094	-0.0440134	-0.374108
ENSG00000090534	THPO	0.336703	0.0899104	0.273866	0.394663	0.982307	0.61284	0.953656	0.666544	0.977955	1	-0.0353483	-0.196382	-0.0746754	-0.121706	-0.0393271	-0.161033
ENSG00000090539	CHRD	0.441988	1.11369	0.932273	0.605727	0.943326	0.896088	0.882427	0.771226	0.670934	0.97736	-0.0936298	0.256939	0.170333	0.0866059	0.263963	0.350569
ENSG00000090554	FLT3LG	1.31381	0.661528	0.694464	0.723975	0.818319	0.98869	0.992877	0.817802	0.807645	0.992831	0.282777	-0.0334587	-0.0157152	-0.0177436	-0.298493	-0.316236
ENSG00000090565	RAB11FIP3	34.2207	43.23	43.5954	45.8287	0.771258	0.984346	0.984136	0.8369	0.776925	0.995787	-0.401062	-0.0805966	-0.0689883	-0.0116083	0.332074	0.320466
ENSG00000090581	GNPTG	24.5402	34.3553	24.9445	25.1458	0.984487	0.342905	0.993102	0.29156	0.988855	0.342905	-0.0325498	0.421437	-0.0107382	0.432175	0.0218116	0.453986
ENSG00000090612	ZNF268	1.45568	4.41433	1.83963	1.54194	0.981418	0.575895	0.929934	0.551554	0.885427	0.665646	-0.0355701	0.856759	0.116428	0.740331	0.151998	0.892329
ENSG00000090615	GOLGA3	11.0799	18.2447	11.2062	9.81767	0.975707	0.695538	0.971482	0.766236	0.995616	0.76331	0.146406	0.776599	0.16027	0.616329	0.0138639	0.630193
ENSG00000090621	PABPC4	471.934	424.703	455.634	472.994	0.996629	0.758651	0.963688	0.768029	0.966709	0.889687	-0.00322313	-0.154677	-0.053715	-0.100962	-0.0504919	-0.151454
ENSG00000090661	CERS4	2.42942	4.91451	1.43556	2.25676	0.977058	0.218184	0.632004	0.336979	0.579527	0.0302512	0.057362	0.699871	-0.30921	1.00908	-0.366573	0.642509
ENSG00000090674	MCOLN1	49.1748	74.2893	46.4108	38.8923	0.765569	0.443654	0.832485	0.709242	0.977392	0.62568	0.323604	0.899652	0.2435	0.656152	-0.0801046	0.576047
ENSG00000090686	USP48	25.6207	19.8664	24.3433	25.2922	0.992831	0.773925	0.982287	0.795557	0.978474	0.834062	0.0172612	-0.319773	-0.0510526	-0.26872	-0.0683138	-0.337034
ENSG00000090776	EFNB1	3.17284	3.06723	3.4266	3.64827	0.77065	0.678847	0.943633	0.977555	0.924737	0.85633	-0.126852	-0.156612	-0.0577605	-0.0988513	0.069092	-0.0297593
ENSG00000090857	PDPR	8.46296	8.36023	8.16613	8.7486	0.983059	0.978371	0.957241	0.992831	0.9812	0.987097	-0.0388577	-0.0530927	-0.0803782	0.0272854	-0.0415205	-0.014235
ENSG00000090861	AARS	130.662	198.219	139.434	206.346	0.00176087	0.961765	0.0279957	0.0104001	0.917351	0.0717915	-0.651226	-0.0574025	-0.558852	0.50145	0.0923738	0.593824
ENSG00000090863	GLG1	38.0755	60.7001	40.7963	49.6981	0.521566	0.756861	0.728918	0.153156	0.952633	0.308768	-0.367391	0.278356	-0.272625	0.550982	0.0947656	0.645747
ENSG00000090889	KIF4A	26.7754	30.8743	27.6327	28.851	0.923673	0.958948	0.969634	0.827042	0.97736	0.894497	-0.100481	0.0916429	-0.0581272	0.14977	0.0423541	0.192124
ENSG00000090905	TNRC6A	16.4415	14.9479	16.479	18.3818	0.959442	0.854908	0.970319	0.942554	0.998241	0.954643	-0.144325	-0.266175	-0.141395	-0.12478	0.00293068	-0.121849
ENSG00000090924	PLEKHG2	41.0125	49.5474	39.0469	43.6404	0.992159	0.980359	0.987128	0.967415	0.992518	0.951399	-0.0855554	0.175588	-0.153038	0.328626	-0.0674827	0.261144
ENSG00000090932	DLL3	2.09996	1.47456	1.77943	1.28414	0.262287	0.913982	0.595523	0.504517	0.847561	0.830929	0.320094	0.0813147	0.202653	-0.121338	-0.117441	-0.23878
ENSG00000090971	NAT14	1.67629	1.0684	1.66299	3.78134	0.265939	0.551305	0.371647	0.873344	0.997168	0.896199	-0.653153	-0.913917	-0.658382	-0.255535	-0.00522881	-0.260764
ENSG00000090975	PITPNM2	4.65417	5.55086	5.38616	4.6005	0.991807	0.804785	0.815356	0.787657	0.803086	0.98438	0.0116834	0.194066	0.162249	0.0318165	0.150566	0.182382
ENSG00000090989	EXOC1	6.49843	7.56404	7.40827	5.45718	0.869282	0.760061	0.629131	0.94413	0.929198	0.992159	0.188566	0.35899	0.335299	0.0236907	0.146733	0.170424
ENSG00000091009	RBM27	32.5927	29.4179	36.2433	34.7737	0.973651	0.915973	0.982947	0.963482	0.947111	0.879185	-0.0882067	-0.227088	0.0565327	-0.28362	0.144739	-0.138881
ENSG00000091039	OSBPL8	18.1597	29.9454	19.3469	14.4337	0.463245	0.549871	0.301588	0.69097	0.935425	0.717039	0.294817	0.958951	0.377369	0.581582	0.0825524	0.664134
ENSG00000091073	DTX2	41.9863	60.3947	82.8724	31.0642	0.473574	0.0104001	0.00176087	0.322264	0.00176087	0.380529	0.411784	0.916153	1.36003	-0.443872	0.948241	0.504369
ENSG00000091127	PUS7	25.6525	23.8782	26.6446	29.815	0.912083	0.762467	0.932204	0.955099	0.980359	0.885827	-0.202297	-0.29797	-0.151444	-0.146526	0.0508533	-0.0956726
ENSG00000091136	LAMB1	23.1777	31.4828	26.2643	19.5136	0.807128	0.676792	0.635825	0.804498	0.908676	0.925527	0.226898	0.638171	0.393732	0.244439	0.166834	0.411274
ENSG00000091140	DLD	47.2519	53.1052	48.7261	46.2213	0.980765	0.801246	0.94224	0.852803	0.9751	0.912083	0.0305088	0.192518	0.0730577	0.11946	0.0425489	0.162009
ENSG00000091157	WDR7	7.79661	4.40701	8.22822	5.80199	0.844903	0.891174	0.812832	0.606219	0.986197	0.580394	0.32844	-0.284191	0.390641	-0.674832	0.0622006	-0.612631
ENSG00000091164	TXNL1	77.7217	73.479	79.8583	61.7271	0.12565	0.378262	0.0587121	0.904867	0.969818	0.804939	0.323065	0.244168	0.361222	-0.117053	0.0381562	-0.0788972
ENSG00000091317	CMTM6	5.81015	6.31558	5.99247	4.73715	0.506035	0.373059	0.440731	0.921682	0.978474	0.965413	0.213212	0.303678	0.246503	0.0571755	0.0332912	0.0904666
ENSG00000091409	ITGA6	21.4759	10.2593	19.5561	3.65064	0.00176087	0.453451	0.00176087	0.601736	0.940793	0.640529	2.05469	1.11739	1.93161	-0.81422	-0.123084	-0.937304
ENSG00000091428	RAPGEF4	0.222422	0.561019	0.316131	0.223585	1	0.464781	1	0.444048	1	0.728806	-0.000754769	0.20383	0.0588293	0.145001	0.0595841	0.204585
ENSG00000091436	MLTK	13.3875	19.3389	13.8639	16.7062	0.266211	0.580394	0.406471	0.00818108	0.965281	0.0332405	-0.281758	0.189969	-0.237769	0.427738	0.0439886	0.471727
ENSG00000091483	FH	166.165	160.583	170.975	155.496	0.800943	0.945263	0.63601	0.937514	0.954643	0.814561	0.0945623	0.0458612	0.135248	-0.0893871	0.0406861	-0.0487011
ENSG00000091490	SEL1L3	20.7488	43.5755	19.2932	21.1587	0.990414	0.605558	0.955014	0.597117	0.970527	0.559564	-0.0257638	0.976704	-0.121161	1.09787	-0.0953977	1.00247
ENSG00000091527	CDV3	126.596	123.007	132.735	117.005	0.831057	0.929541	0.663191	0.97034	0.939503	0.867436	0.111824	0.0709867	0.179102	-0.108116	0.0672789	-0.0408369
ENSG00000091542	ALKBH5	31.9264	32.6582	29.5487	29.8945	0.848125	0.776744	0.986275	0.97629	0.793033	0.723623	0.0891007	0.119889	-0.0157271	0.135616	-0.104828	0.0307884
ENSG00000091622	PITPNM3	9.12385	9.69851	10.0151	8.16848	0.800639	0.770346	0.628042	0.958812	0.899277	0.984967	0.129552	0.202221	0.240745	-0.0385239	0.111192	0.0726686
ENSG00000091640	SPAG7	52.0399	50.7302	54.8406	59.6871	0.57588	0.437208	0.811157	0.975312	0.922846	0.840156	-0.190944	-0.226339	-0.118047	-0.108292	0.0728968	-0.0353955
ENSG00000091651	ORC6	20.1201	36.1193	18.0256	22.0839	0.914048	0.347415	0.61284	0.219967	0.907055	0.0882043	-0.122711	0.662453	-0.266224	0.928676	-0.143512	0.785164
ENSG00000091732	ZC3HC1	23.7348	27.3384	25.9481	30.6893	0.457014	0.921209	0.651264	0.908571	0.898414	0.971875	-0.345098	-0.156028	-0.226068	0.07004	0.11903	0.18907
ENSG00000091947	TMEM101	16.8911	18.7061	15.4971	20.1667	0.577783	0.907518	0.274676	0.870656	0.899144	0.624443	-0.230687	-0.0983382	-0.341278	0.24294	-0.110591	0.132349
ENSG00000091986	CCDC80	4.09271	1.84976	4.22632	2.16369	0.518135	0.967415	0.557568	0.365845	0.989854	0.403938	0.549221	-0.113094	0.580517	-0.693611	0.0312957	-0.662316
ENSG00000092010	PSME1	98.9849	94.2843	99.9419	105.427	0.929094	0.810011	0.94224	0.956706	0.990414	0.935603	-0.089217	-0.157984	-0.0756095	-0.0823747	0.0136076	-0.0687671
ENSG00000092020	PPP2R3C	20.1756	18.9895	17.812	17.8088	0.971928	0.986275	0.999867	0.986677	0.965695	0.984685	0.162832	0.0835263	0.00023304	0.0832933	-0.162599	-0.0793053
ENSG00000092036	HAUS4	25.0286	34.4229	28.5173	28.4932	0.922239	0.847408	0.999382	0.668417	0.924516	0.848878	-0.174001	0.256358	0.00113977	0.255218	0.175141	0.430359
ENSG00000092068	SLC7A8	0.671299	1.70227	0.962891	1.11959	0.517136	0.83899	0.954643	0.61861	0.804523	0.818951	-0.223815	0.247054	-0.0743509	0.321405	0.149464	0.470869
ENSG00000092094	OSGEP	19.9308	26.2235	18.4708	15.0718	0.457489	0.208389	0.634086	0.685018	0.941683	0.536611	0.361343	0.725282	0.261952	0.463329	-0.099391	0.363938
ENSG00000092098	RNF31	47.406	34.6358	42.462	45.9533	0.989065	0.814935	0.975707	0.77438	0.961073	0.893218	0.0430562	-0.388376	-0.109057	-0.279319	-0.152113	-0.431432
ENSG00000092108	SCFD1	45.613	52.6842	47.5636	40.2448	0.815261	0.360445	0.775302	0.753776	0.974744	0.901612	0.172582	0.37235	0.230507	0.141843	0.0579254	0.199769
ENSG00000092140	G2E3	12.9014	22.009	15.1174	12.3567	0.989651	0.824193	0.938082	0.817734	0.952425	0.886457	0.0537237	0.741851	0.253739	0.488112	0.200016	0.688127
ENSG00000092148	HECTD1	40.0862	41.4134	37.0936	35.4205	0.896801	0.890439	0.977944	0.985622	0.952425	0.938433	0.169518	0.214312	0.0631036	0.151208	-0.106415	0.0447932
ENSG00000092199	HNRNPC	670.451	516.777	664.244	571.987	0.356275	0.778931	0.423506	0.17938	0.988034	0.210701	0.228411	-0.145904	0.215033	-0.360936	-0.0133785	-0.374315
ENSG00000092201	SUPT16H	58.6307	77.1392	59.3157	68.8971	0.228812	0.809276	0.304075	0.517675	0.984109	0.539655	-0.225678	0.158666	-0.20947	0.368136	0.016208	0.384344
ENSG00000092203	TOX4	46.1746	39.3116	53.4275	44.9205	0.981313	0.861321	0.723037	0.790182	0.772238	0.504033	0.0380543	-0.183671	0.240384	-0.424055	0.202329	-0.221726
ENSG00000092208	GEMIN2	14.1517	10.5762	13.1635	13.9417	0.990826	0.718594	0.971111	0.702569	0.962061	0.848917	0.0188805	-0.342109	-0.0722027	-0.269907	-0.0910832	-0.36099
ENSG00000092295	TGM1	4.76738	5.86254	4.99802	5.87843	0.767613	0.99805	0.87428	0.808679	0.978517	0.895965	-0.219311	-0.00291271	-0.170961	0.168049	0.0483494	0.216398
ENSG00000092330	TINF2	18.997	28.6275	24.4421	13.7189	0.444397	0.643015	0.0372896	0.761393	0.630775	0.920989	0.417683	0.962327	0.750336	0.211991	0.332654	0.544644
ENSG00000092439	TRPM7	10.8713	10.0239	9.88905	8.05289	0.497325	0.614644	0.648677	0.943326	0.922041	0.990414	0.356547	0.258295	0.242023	0.0162715	-0.114524	-0.0982529
ENSG00000092445	TYRO3	31.3355	56.8187	28.9572	38.3659	0.671276	0.391003	0.449079	0.0858175	0.936909	0.0365309	-0.276078	0.543138	-0.382862	0.926	-0.106784	0.819216
ENSG00000092470	WDR76	24.7347	25.9629	25.2298	19.3507	0.393039	0.279824	0.337522	0.960361	0.984381	0.978842	0.32443	0.389231	0.350903	0.0383276	0.0264729	0.0648005
ENSG00000092531	SNAP23	43.7068	55.5897	44.2979	31.4782	0.341587	0.11332	0.29042	0.704252	0.990821	0.724032	0.449187	0.782589	0.467725	0.314864	0.0185379	0.333402
ENSG00000092621	PHGDH	275.424	329.404	286.188	344.279	0.0241497	0.895965	0.102053	0.134782	0.920734	0.303923	-0.319842	-0.0633439	-0.264925	0.201581	0.0549177	0.256498
ENSG00000092758	COL9A3	4.63948	7.36742	4.13659	5.28577	0.964763	0.868799	0.896027	0.726731	0.966709	0.605627	-0.134011	0.36257	-0.247644	0.610215	-0.113633	0.496581
ENSG00000092820	EZR	238.079	179.933	230.931	180.747	0.00458804	0.992487	0.0144433	0.0125108	0.951281	0.0279957	0.393661	-0.00644047	0.350055	-0.356495	-0.0436066	-0.400102
ENSG00000092841	MYL6	1107.05	1063.3	1145.2	966.747	0.745707	0.852778	0.692991	0.961961	0.975812	0.91167	0.195133	0.137068	0.243925	-0.106857	0.0487925	-0.0580646
ENSG00000092847	EIF2C1	5.92453	8.14003	5.93416	5.86601	0.990414	0.153915	0.989042	0.167371	0.997476	0.174223	0.0106934	0.366358	0.0124455	0.353913	0.00175212	0.355665
ENSG00000092853	CLSPN	19.7679	26.2655	20.6028	18.234	0.921986	0.638797	0.819447	0.732823	0.972316	0.767613	0.105421	0.482261	0.15972	0.322541	0.0542993	0.37684
ENSG00000092871	RFFL	6.38894	11.2323	10.1847	13.7897	0.515835	0.961924	0.926982	0.780468	0.839676	0.985622	-0.912423	-0.25492	-0.373913	0.118993	0.53851	0.657503
ENSG00000092929	UNC13D	22.4478	37.7827	18.7251	23.4257	0.98438	0.5894	0.857999	0.550823	0.908542	0.355405	-0.0565828	0.645854	-0.294908	0.940762	-0.238326	0.702437
ENSG00000092931	MFSD11	10.0016	13.7329	12.4122	14.2109	0.794549	0.990145	0.962341	0.8506	0.926478	0.977469	-0.433737	-0.0431796	-0.169674	0.126494	0.264064	0.390558
ENSG00000092964	DPYSL2	6.25761	10.4228	6.285	5.75727	0.85771	0.235889	0.85198	0.343967	0.994387	0.35014	0.0901753	0.679369	0.0949527	0.584417	0.00477741	0.589194
ENSG00000092969	TGFB2	3.10483	10.9323	3.07265	1.83067	0.589849	0.323802	0.574382	0.561083	0.994387	0.556556	0.414266	1.75531	0.405143	1.35017	-0.0091233	1.34104
ENSG00000092978	GPATCH2	3.09384	3.19145	2.98947	3.84721	0.644922	0.730504	0.492054	0.982307	0.978474	0.952106	-0.198995	-0.171611	-0.228862	0.057251	-0.0298671	0.0273839
ENSG00000093000	NUP50	75.2738	96.1888	78.5077	57.0072	0.553539	0.342905	0.47768	0.749627	0.97736	0.823271	0.389088	0.734667	0.448236	0.286432	0.0591474	0.345579
ENSG00000093009	CDC45	30.6015	43.9242	27.3505	21.8891	0.295669	0.0125108	0.61794	0.363869	0.879867	0.164331	0.448586	0.942902	0.297033	0.64587	-0.151553	0.494316
ENSG00000093010	COMT	218.055	115.385	227.064	137.017	0.147738	0.868379	0.110679	0.137133	0.978383	0.0991657	0.662603	-0.244013	0.720489	-0.964503	0.0578866	-0.906616
ENSG00000093100	XXbac-B461K10.4	0.634562	2.78022	0.482891	0.8792	0.91865	0.160126	0.711067	0.434655	0.957671	0.0684135	-0.128105	0.731409	-0.213647	0.945056	-0.0855422	0.859514
ENSG00000093144	ECHDC1	103.028	150.077	114.264	111.824	0.988294	0.953745	0.995127	0.920884	0.984109	0.952633	-0.116031	0.417997	0.0305997	0.387398	0.14663	0.534028
ENSG00000093167	LRRFIP2	41.5591	32.7737	41.1599	36.6171	0.960906	0.969408	0.965615	0.89462	0.996071	0.903852	0.173734	-0.151243	0.160452	-0.311695	-0.0132826	-0.324978
ENSG00000093183	SEC22C	17.5129	20.097	14.1601	16.8854	0.981129	0.79434	0.798071	0.869829	0.731056	0.393939	0.0471569	0.226579	-0.224835	0.451414	-0.271992	0.179422
ENSG00000093217	XYLB	4.51012	4.31216	3.66727	3.56015	0.735655	0.783447	0.986275	0.981477	0.837002	0.868379	0.22756	0.18301	0.0275301	0.15548	-0.20003	-0.0445504
ENSG00000094631	HDAC6	51.9372	87.9812	45.7958	63.237	0.708236	0.336255	0.346342	0.0309815	0.861761	0.00458804	-0.27441	0.463933	-0.448807	0.91274	-0.174397	0.738343
ENSG00000094804	CDC6	94.6215	73.6536	93.4219	54.1191	0.00176087	0.506227	0.00176087	0.614644	0.989042	0.639729	0.783852	0.430917	0.765829	-0.334912	-0.0180238	-0.352936
ENSG00000094841	UPRT	5.3372	5.2871	5.23341	4.72895	0.894701	0.941738	0.930556	0.993753	0.988988	0.993753	0.124848	0.114963	0.104295	0.0106689	-0.0205537	-0.00988482
ENSG00000094880	CDC23	21.4435	13.617	19.643	17.0026	0.633142	0.778544	0.829627	0.351543	0.921033	0.49782	0.302991	-0.283079	0.187704	-0.470783	-0.115287	-0.586071
ENSG00000094914	AAAS	114.588	128.161	124.552	142.473	0.162312	0.764061	0.559057	0.731283	0.788911	0.971586	-0.309381	-0.150503	-0.19107	0.0405669	0.118311	0.158878
ENSG00000094916	CBX5	56.9138	93.644	58.5573	79.1862	0.686579	0.880619	0.72139	0.343242	0.989042	0.377556	-0.462629	0.23644	-0.422934	0.659374	0.0396953	0.699069
ENSG00000094975	SUCO	2.84155	3.35774	3.03959	3.77247	0.303232	0.799412	0.47522	0.70723	0.941582	0.86826	-0.25372	-0.107564	-0.195882	0.0883182	0.0578374	0.146156
ENSG00000095002	MSH2	40.3857	31.9461	39.2655	34.9145	0.760061	0.908869	0.840738	0.512288	0.980359	0.608813	0.19939	-0.120942	0.160749	-0.28169	-0.0386415	-0.320332
ENSG00000095015	MAP3K1	2.0007	1.67368	2.46917	1.07481	0.00582385	0.0667157	0.00176087	0.625571	0.465543	0.055704	0.379755	0.256729	0.53951	-0.282781	0.159754	-0.123026
ENSG00000095059	DHPS	99.0109	105.058	77.022	78.4646	0.809919	0.750046	0.990589	0.979507	0.762973	0.697502	0.328085	0.411966	-0.0260999	0.438066	-0.354185	0.0838816
ENSG00000095066	HOOK2	10.7896	19.7479	6.8672	14.8836	0.866186	0.907026	0.310991	0.758133	0.763881	0.398865	-0.400651	0.365254	-0.929072	1.29433	-0.528421	0.765905
ENSG00000095139	ARCN1	41.7918	39.1341	41.6519	40.5235	0.973154	0.971875	0.976767	0.937927	0.995976	0.943326	0.0424004	-0.0479255	0.0377841	-0.0857096	-0.0046163	-0.0903259
ENSG00000095203	EPB41L4B	5.40342	6.23139	5.43418	4.90071	0.831357	0.271395	0.806858	0.657826	0.993494	0.673403	0.101447	0.254391	0.107429	0.146962	0.00598174	0.152944
ENSG00000095209	TMEM38B	21.4159	25.1651	21.3963	18.2501	0.771488	0.760449	0.808925	0.897727	0.999269	0.919538	0.209559	0.423825	0.208351	0.215474	-0.0012081	0.214266
ENSG00000095261	PSMD5	33.7908	28.7312	33.3095	20.1276	0.00324853	0.608939	0.00176087	0.818319	0.986071	0.839354	0.693742	0.473857	0.674209	-0.200352	-0.0195324	-0.219885
ENSG00000095303	PTGS1	0.172016	0.206832	0.284829	0.376076	0.45526	0.637264	0.869543	1	1	1	-0.129546	-0.106604	-0.0564948	-0.0501094	0.0730515	0.0229421
ENSG00000095319	NUP188	178.86	219.77	179.336	167.993	0.982063	0.880519	0.980296	0.909181	0.998212	0.9028	0.089398	0.383589	0.09319	0.290399	0.003792	0.294191
ENSG00000095321	CRAT	9.33896	11.8663	9.39716	11.1661	0.939456	0.983545	0.934981	0.900291	0.997168	0.888649	-0.21554	0.0747548	-0.208154	0.282909	0.00738605	0.290295
ENSG00000095380	NANS	111.02	94.2801	113.933	100.332	0.777016	0.915279	0.666577	0.470173	0.972338	0.34692	0.143321	-0.0879478	0.180034	-0.267982	0.0367132	-0.231269
ENSG00000095383	TBC1D2	17.1909	14.392	16.3601	14.6508	0.44178	0.98152	0.70195	0.366692	0.923091	0.619934	0.204831	-0.0225996	0.140982	-0.163582	-0.0638485	-0.22743
ENSG00000095397	DFNB31	10.9559	10.7097	11.7387	10.392	0.952649	0.979492	0.809718	0.983975	0.927496	0.897399	0.0642002	0.0365209	0.148836	-0.112316	0.0846363	-0.0276793
ENSG00000095485	CWF19L1	29.0575	25.2339	26.9559	25.243	0.770198	0.999581	0.943472	0.848972	0.930752	0.962061	0.189056	-0.000481985	0.0879718	-0.0884537	-0.101084	-0.189538
ENSG00000095564	BTAF1	10.9	12.1224	12.5415	9.76635	0.661118	0.31061	0.0882043	0.757566	0.535741	0.966341	0.132704	0.263318	0.305509	-0.0421908	0.172805	0.130614
ENSG00000095574	IKZF5	9.31875	17.2651	17.0252	12.3113	0.913982	0.898644	0.913839	0.698888	0.727916	0.996505	-0.33844	0.428835	0.410757	0.0180781	0.749197	0.767275
ENSG00000095637	SORBS1	2.09067	0.806096	1.61558	0.845585	0.0332405	0.985622	0.154234	0.117103	0.76969	0.322264	0.523612	-0.0201609	0.345502	-0.365663	-0.17811	-0.543773
ENSG00000095739	BAMBI	23.0147	53.5217	54.5555	15.0492	0.00324853	0.00176087	0.00176087	0.00176087	0.00176087	0.976794	0.553072	1.70335	1.72996	-0.0266156	1.17689	1.15028
ENSG00000095752	IL11	0.366429	0.304417	0.302927	0.112953	0.28265	1	1	0.958948	0.961635	1	0.163451	0.125141	0.124208	0.000933126	-0.039243	-0.0383098
ENSG00000095787	WAC	55.9771	51.4862	63.8311	50.6348	0.812832	0.987097	0.304075	0.885827	0.660831	0.472588	0.139466	0.0231497	0.322752	-0.299603	0.183286	-0.116316
ENSG00000095794	CREM	25.1635	62.3444	25.9062	32.0042	0.674849	0.10385	0.708965	0.0171566	0.984874	0.0207025	-0.324044	0.920102	-0.285127	1.20523	0.0389163	1.24415
ENSG00000095906	NUBP2	130.172	153.165	137.076	166.156	0.0750318	0.807157	0.246732	0.422419	0.911314	0.672605	-0.347384	-0.115997	-0.273927	0.15793	0.0734569	0.231387
ENSG00000095951	HIVEP1	10.376	14.6219	16.497	9.01846	0.863456	0.421131	0.0826771	0.589962	0.180629	0.935227	0.167623	0.593163	0.747369	-0.154206	0.579746	0.42554
ENSG00000096060	FKBP5	26.2092	24.0169	27.0832	26.7133	0.981782	0.807339	0.986458	0.865964	0.967951	0.773529	-0.0255534	-0.14227	0.0184669	-0.160737	0.0440203	-0.116717
ENSG00000096063	SRPK1	75.4386	121.698	80.6234	81.244	0.975547	0.539285	0.995122	0.426928	0.975614	0.474007	-0.104293	0.571404	-0.0107959	0.5822	0.0934976	0.675697
ENSG00000096070	BRPF3	8.73858	9.06485	6.62041	9.47406	0.941512	0.957723	0.0622683	0.97983	0.680442	0.157045	-0.0955727	-0.0523921	-0.412548	0.360156	-0.316975	0.0431807
ENSG00000096080	MRPS18A	82.9659	71.2519	84.8047	80.6378	0.966645	0.596955	0.914806	0.451608	0.976767	0.341275	0.0400821	-0.173936	0.0709713	-0.244907	0.0308892	-0.214018
ENSG00000096092	TMEM14A	27.2618	20.7699	27.2546	25.3123	0.895965	0.497449	0.893896	0.239774	0.999533	0.232726	0.0994677	-0.262423	0.0991127	-0.361536	-0.000355025	-0.361891
ENSG00000096093	EFHC1	1.16663	4.54506	1.19087	1.58511	0.829559	0.2568	0.852517	0.0867002	0.993509	0.093825	-0.179069	0.868389	-0.168068	1.03646	0.0110015	1.04746
ENSG00000096384	HSP90AB1	2101.08	2030.03	2116.84	2028.08	0.93699	0.997476	0.909794	0.936021	0.98902	0.909701	0.0509671	0.00138512	0.0617381	-0.0603529	0.0107709	-0.049582
ENSG00000096401	CDC5L	14.2652	14.4622	15.4711	14.7442	0.951326	0.976794	0.90408	0.982307	0.763175	0.827688	-0.0418729	-0.0245043	0.061309	-0.0858133	0.103182	0.0173686
ENSG00000096433	ITPR3	27.5234	24.6558	28.3285	23.1621	0.178752	0.819834	0.0867002	0.540588	0.952971	0.362944	0.230607	0.0831971	0.269422	-0.186225	0.0388153	-0.147409
ENSG00000096654	ZNF184	2.51285	1.91378	2.14023	3.29203	0.457955	0.0426481	0.11998	0.546952	0.798259	0.904632	-0.229782	-0.435259	-0.35411	-0.0811483	-0.124328	-0.205476
ENSG00000096696	DSP	138.558	133.666	143.504	133.155	0.914917	0.992987	0.739424	0.926357	0.930514	0.761687	0.0565507	0.00544432	0.106444	-0.101	0.0498932	-0.0511064
ENSG00000096717	SIRT1	10.7855	22.721	12.6281	15.7435	0.072309	0.614644	0.546435	0.163742	0.688356	0.346342	-0.472782	0.478446	-0.278548	0.756995	0.194234	0.951229
ENSG00000096746	HNRNPH3	298.008	251.866	288.021	254.02	0.657696	0.993494	0.794927	0.792211	0.975707	0.867868	0.228744	-0.0121893	0.179901	-0.19209	-0.0488436	-0.240934
ENSG00000096872	IFT74	5.15282	6.66296	5.6374	4.733	0.978203	0.880797	0.945005	0.918382	0.977121	0.961635	0.0872627	0.363611	0.181832	0.181778	0.0945694	0.276348
ENSG00000096968	JAK2	5.0699	3.60658	3.55617	2.63405	0.607714	0.86602	0.849493	0.801351	0.749426	0.993753	0.609416	0.274847	0.261817	0.0130303	-0.347599	-0.334569
ENSG00000097007	ABL1	37.5946	38.8974	43.6171	39.5631	0.961123	0.988145	0.817802	0.977469	0.641399	0.793033	-0.0699996	-0.0232941	0.134271	-0.157566	0.204271	0.0467054
ENSG00000097021	ACOT7	85.7641	78.8478	87.4273	84.0914	0.978371	0.890749	0.943554	0.821978	0.978371	0.758788	0.0277618	-0.0906606	0.0548462	-0.145507	0.0270844	-0.118422
ENSG00000097033	SH3GLB1	60.5557	58.128	62.7245	54.1769	0.676603	0.874854	0.496912	0.952309	0.957442	0.855253	0.155164	0.09806	0.204335	-0.106275	0.0491706	-0.0571044
ENSG00000097046	CDC7	14.0324	12.9988	13.3419	18.1248	0.638219	0.169201	0.291993	0.946561	0.974686	0.981787	-0.327984	-0.424127	-0.391497	-0.0326301	-0.0635132	-0.0961433
ENSG00000097096	SYDE2	3.36064	3.23637	2.0154	3.20066	0.96272	0.991777	0.061101	0.976794	0.0241497	0.0533112	0.0437105	0.00987232	-0.373151	0.383023	-0.416862	-0.0338382
ENSG00000099194	SCD	167.756	162.268	158.334	162.519	0.974686	0.998048	0.979561	0.973213	0.932204	0.980228	0.0452084	-0.00220274	-0.0371738	0.0349711	-0.0823822	-0.0474111
ENSG00000099203	TMED1	50.1875	85.3105	59.6352	71.8108	0.590666	0.880954	0.877138	0.265496	0.894701	0.61156	-0.500128	0.242323	-0.260077	0.502401	0.24005	0.742451
ENSG00000099204	ABLIM1	78.5424	44.472	78.699	42.1726	0.00176087	0.962495	0.00176087	0.00818108	0.997171	0.00582385	0.866597	0.07321	0.869399	-0.796189	0.00280233	-0.793387
ENSG00000099219	ERMP1	16.1739	16.0168	17.3274	15.502	0.942554	0.966897	0.697502	0.990145	0.875478	0.874707	0.0543483	0.041823	0.143128	-0.101305	0.0887795	-0.0125253
ENSG00000099246	RAB18	92.0935	117.373	87.1459	87.571	0.938472	0.153915	0.993648	0.293504	0.92686	0.135167	0.0710634	0.414373	-0.00686327	0.421236	-0.0779266	0.34331
ENSG00000099250	NRP1	10.226	8.57252	9.28114	7.37403	0.569575	0.91888	0.709059	0.934844	0.955099	0.97624	0.383211	0.173578	0.267172	-0.0935936	-0.11604	-0.209633
ENSG00000099256	PRTFDC1	8.07909	6.623	8.85216	6.38245	0.675639	0.983975	0.479314	0.806078	0.935603	0.656918	0.265922	0.0408179	0.372538	-0.33172	0.106617	-0.225104
ENSG00000099260	PALMD	14.8373	8.26479	13.3225	10.7856	0.0400065	0.183309	0.293804	0.00176087	0.733998	0.00176087	0.397141	-0.316816	0.261132	-0.577948	-0.136009	-0.713957
ENSG00000099290	FAM21A	6.35487	5.69549	5.22961	6.17306	0.985759	0.949954	0.778619	0.904914	0.689731	0.919767	0.0317411	-0.0868631	-0.176959	0.0900954	-0.2087	-0.118604
ENSG00000099308	MAST3	3.52608	1.98802	2.40978	2.59266	0.360945	0.389025	0.924385	0.063306	0.225503	0.616965	0.266926	-0.203657	-0.0586233	-0.145034	-0.32555	-0.470584
ENSG00000099326	MZF1	5.19305	7.35387	6.0203	5.15737	0.994809	0.555847	0.871325	0.555569	0.877665	0.86572	0.00717407	0.386134	0.164227	0.221907	0.157053	0.37896
ENSG00000099330	OCEL1	28.9502	33.9015	27.3076	38.3288	0.733655	0.952172	0.569123	0.937679	0.977944	0.872133	-0.381862	-0.167766	-0.460536	0.292769	-0.0786739	0.214095
ENSG00000099331	MYO9B	24.9977	24.9063	27.6469	20.4863	0.679067	0.813485	0.435694	0.997207	0.914806	0.945556	0.26379	0.258898	0.398835	-0.139937	0.135045	-0.00489249
ENSG00000099341	PSMD8	193.725	185.342	201.248	193.402	0.997007	0.943554	0.941185	0.941962	0.946561	0.827665	0.00238281	-0.0607709	0.0567959	-0.117567	0.0544131	-0.0631537
ENSG00000099364	FBXL19	38.5424	46.4606	38.0651	58.1203	0.607637	0.784718	0.597871	0.814935	0.993068	0.771615	-0.568421	-0.31104	-0.585506	0.274466	-0.0170854	0.257381
ENSG00000099365	STX1B	0.902218	0.619125	1.15868	0.717335	0.753957	0.912424	0.2568	0.55754	0.707139	0.17849	0.0949635	-0.0531075	0.217129	-0.270237	0.122166	-0.148071
ENSG00000099377	HSD3B7	20.0672	26.439	22.3721	26.1075	0.284133	0.98902	0.660831	0.275704	0.834516	0.643401	-0.349052	0.0169156	-0.205725	0.22264	0.143327	0.365967
ENSG00000099381	SETD1A	14.4756	14.0479	12.15	17.0688	0.75997	0.636246	0.233587	0.981765	0.736215	0.778931	-0.210883	-0.24883	-0.430412	0.181582	-0.219529	-0.0379465
ENSG00000099385	BCL7C	42.5742	39.6068	39.2735	43.3163	0.980618	0.757704	0.717398	0.835424	0.801649	0.989817	-0.0238212	-0.123211	-0.134814	0.0116035	-0.110993	-0.0993896
ENSG00000099617	EFNA2	2.73788	1.78232	1.98788	1.81122	0.553582	0.993501	0.970046	0.580842	0.740743	0.968868	0.313989	-0.0109815	0.0653691	-0.0763506	-0.24862	-0.32497
ENSG00000099622	CIRBP	42.0278	63.9402	40.1026	67.3797	0.00458804	0.9394	0.00176087	0.0171566	0.958765	0.00176087	-0.656099	-0.0733553	-0.720604	0.647249	-0.0645054	0.582744
ENSG00000099624	ATP5D	547.815	461.167	541.757	448.913	0.0991657	0.960668	0.12454	0.193182	0.984967	0.245749	0.286097	0.0386834	0.270113	-0.23143	-0.0159842	-0.247414
ENSG00000099625	C19orf26	1.51247	1.08792	1.26318	1.83328	0.909615	0.728541	0.770252	0.867442	0.936126	0.970779	-0.126093	-0.311944	-0.232301	-0.0796432	-0.106207	-0.185851
ENSG00000099783	HNRNPM	884.189	913.105	837.468	782.749	0.942088	0.923719	0.97597	0.988666	0.980359	0.971119	0.175383	0.221706	0.097244	0.124462	-0.0781391	0.0463229
ENSG00000099785	MARCH2	15.832	12.8018	14.6339	20.1699	0.714271	0.186072	0.52021	0.7801	0.964517	0.892238	-0.314134	-0.58283	-0.414476	-0.168354	-0.100342	-0.268696
ENSG00000099795	NDUFB7	223.245	184.337	223.486	220.835	0.987652	0.317823	0.986378	0.263858	0.997897	0.271686	0.0155192	-0.258062	0.017062	-0.275124	0.00154278	-0.273581
ENSG00000099797	TECR	371.516	418.151	406.311	373.924	0.993509	0.86213	0.895657	0.842847	0.879046	0.980629	-0.00927098	0.160467	0.119227	0.0412395	0.128498	0.169738
ENSG00000099800	TIMM13	349.023	384.091	349.768	364.074	0.966127	0.950559	0.967268	0.859129	0.997041	0.861944	-0.0605697	0.0768056	-0.0575111	0.134317	0.00305869	0.137375
ENSG00000099804	CDC34	112.208	138.503	119.451	121.591	0.946561	0.899366	0.989854	0.766953	0.964604	0.87206	-0.11391	0.185027	-0.0251993	0.210227	0.0887107	0.298937
ENSG00000099810	MTAP	112.507	79.0021	106.047	78.0738	0.867884	0.996629	0.851907	0.880797	0.984346	0.865964	0.516034	0.016629	0.432257	-0.415628	-0.0837768	-0.499405
ENSG00000099812	C19orf21	107.969	73.7904	101.524	94.212	0.363303	0.0249185	0.75136	0.00176087	0.82496	0.00176087	0.192808	-0.344202	0.105677	-0.449878	-0.0871316	-0.53701
ENSG00000099814	KIAA0284	10.3235	15.2503	9.29944	11.8434	0.684864	0.78898	0.229836	0.734787	0.827365	0.69153	-0.167786	0.317423	-0.292947	0.61037	-0.125161	0.485209
ENSG00000099817	POLR2E	207.137	191.104	212.479	199.665	0.964604	0.958812	0.888649	0.892998	0.975767	0.788891	0.0524876	-0.0625827	0.0888757	-0.151458	0.0363881	-0.11507
ENSG00000099821	POLRMT	90.1486	118.203	100.006	75.3415	0.745081	0.745124	0.500649	0.81657	0.888143	0.902673	0.25272	0.636158	0.399339	0.236819	0.14662	0.383439
ENSG00000099822	HCN2	35.8717	16.161	33.6609	18.5461	0.00176087	0.571476	0.00176087	0.00176087	0.839414	0.00176087	0.882256	-0.178021	0.795479	-0.973499	-0.0867771	-1.06028
ENSG00000099849	RASSF7	32.9045	23.4886	24.9983	27.5568	0.838688	0.880816	0.948193	0.597924	0.705481	0.976767	0.239923	-0.213638	-0.130622	-0.0830164	-0.370544	-0.453561
ENSG00000099860	GADD45B	39.6889	14.6846	38.9625	27.8701	0.857336	0.704207	0.863402	0.398795	0.993784	0.395604	0.480961	-0.840185	0.455602	-1.29579	-0.0253595	-1.32115
ENSG00000099864	PALM	32.9283	26.0704	32.0621	31.7727	0.980353	0.807339	0.993325	0.768029	0.986035	0.813319	0.0485389	-0.266808	0.0123099	-0.279118	-0.036229	-0.315347
ENSG00000099875	MKNK2	73.2486	122.731	69.4052	106.577	0.00818108	0.630622	0.00931705	0.00176087	0.937815	0.00176087	-0.528982	0.200102	-0.604617	0.804719	-0.0756356	0.729083
ENSG00000099889	ARVCF	2.37714	10.0836	3.17675	7.02398	0.355672	0.862433	0.543181	0.190399	0.941885	0.358606	-1.04378	0.421215	-0.801717	1.22293	0.242058	1.46499
ENSG00000099899	TRMT2A	79.954	85.7252	92.2634	82.7068	0.984848	0.984153	0.939586	0.966341	0.88854	0.964922	-0.0476634	0.0505135	0.15422	-0.103706	0.201883	0.098177
ENSG00000099901	RANBP1	848.636	708.691	874.096	856.435	0.992074	0.706667	0.984967	0.740458	0.97978	0.66548	-0.013167	-0.272486	0.0293801	-0.301867	0.0425471	-0.259319
ENSG00000099904	ZDHHC8	36.3881	37.3162	32.9668	35.4326	0.984381	0.971479	0.949481	0.986197	0.915119	0.881609	0.0363639	0.0708286	-0.0983095	0.169138	-0.134673	0.0344647
ENSG00000099910	KLHL22	6.19753	11.5899	7.65784	7.48315	0.799412	0.337175	0.987652	0.0942448	0.76465	0.395732	-0.210177	0.519097	0.0263342	0.492762	0.236511	0.729274
ENSG00000099917	MED15	62.1319	83.5054	74.2986	84.4998	0.540609	0.992541	0.908869	0.505241	0.800665	0.91167	-0.431655	-0.0166813	-0.18104	0.164359	0.250614	0.414973
ENSG00000099940	SNAP29	39.2478	37.5913	36.9787	34.8031	0.898728	0.950891	0.966635	0.978474	0.969871	0.990414	0.16449	0.105356	0.0828587	0.0224975	-0.0816312	-0.0591337
ENSG00000099942	CRKL	17.6532	24.1437	16.4269	22.6871	0.0295439	0.843928	0.00324853	0.00176087	0.81657	0.00176087	-0.328993	0.082706	-0.421944	0.50465	-0.0929509	0.411699
ENSG00000099949	LZTR1	38.7212	69.5887	42.7233	48.7368	0.733718	0.724383	0.907518	0.48517	0.944762	0.60558	-0.317252	0.496699	-0.182006	0.678705	0.135247	0.813952
ENSG00000099956	SMARCB1	100.819	87.716	104.534	93.8797	0.809021	0.829602	0.621609	0.438056	0.941885	0.248198	0.10081	-0.0958601	0.152017	-0.247877	0.051207	-0.19667
ENSG00000099957	P2RX6	0.689594	0.352549	0.386319	0.246027	0.378091	0.901612	0.821754	0.724383	0.738424	0.984189	0.260013	0.0668495	0.0874116	-0.0205621	-0.172601	-0.193164
ENSG00000099958	DERL3	1.68788	1.33483	2.51236	1.65477	0.995872	0.968512	0.909261	0.965402	0.921044	0.839414	0.0130111	-0.132167	0.304102	-0.436269	0.29109	-0.145178
ENSG00000099968	BCL2L13	39.9171	44.3472	39.57	22.7616	0.0365309	0.467031	0.0445736	0.943854	0.992541	0.941683	0.759434	0.904378	0.747438	0.156939	-0.0119962	0.144943
ENSG00000099974	DDTL	0.786145	0.649882	0.725269	1.12605	0.902222	0.842552	0.874707	0.976767	0.987983	0.986677	-0.166071	-0.238413	-0.197942	-0.0404705	-0.0318717	-0.0723422
ENSG00000099977	DDT	211.754	335.761	214.38	215.674	0.987513	0.431796	0.994029	0.402697	0.990826	0.427144	-0.0262177	0.633834	-0.00860194	0.642436	0.0176157	0.660051
ENSG00000099984	GSTT2	3.92166	3.96061	4.09804	2.91299	0.914311	0.924251	0.885533	0.997168	0.99026	0.992738	0.2694	0.278859	0.311744	-0.0328856	0.042344	0.00945832
ENSG00000099991	CABIN1	17.976	31.9027	19.6644	22.9685	0.277244	0.600329	0.653668	0.276123	0.873344	0.399719	-0.321841	0.441291	-0.204783	0.646074	0.117059	0.763132
ENSG00000099992	TBC1D10A	5.08587	7.55384	8.63941	5.59875	0.960906	0.816491	0.357433	0.777271	0.350519	0.947881	-0.100817	0.330319	0.485584	-0.155266	0.586401	0.431136
ENSG00000099994	SUSD2	0.723989	1.41669	0.718633	0.841412	0.903852	0.200681	0.894955	0.0661081	0.995213	0.0649905	-0.0608872	0.265991	-0.0637266	0.329718	-0.00283947	0.326878
ENSG00000099995	SF3A1	319.707	343.154	374.218	324.873	0.989056	0.964126	0.806073	0.936909	0.733718	0.912083	-0.0229829	0.07851	0.202839	-0.124329	0.225822	0.101493
ENSG00000099999	RNF215	3.86134	2.98219	3.23598	3.58765	0.987652	0.974073	0.982307	0.969858	0.976406	0.989042	0.0689889	-0.165462	-0.0937821	-0.0716795	-0.162771	-0.23445
ENSG00000100003	SEC14L2	4.71003	1.62287	3.34436	3.38761	0.909912	0.652968	0.996345	0.422419	0.912167	0.686171	0.316674	-0.572512	-0.0116282	-0.560884	-0.328302	-0.889186
ENSG00000100014	SPECC1L	16.1899	24.7451	14.1262	22.3057	0.50832	0.940793	0.20103	0.291829	0.851817	0.0767071	-0.418157	0.13798	-0.591888	0.729868	-0.173731	0.556137
ENSG00000100023	PPIL2	23.5474	29.0876	24.4112	29.7299	0.130006	0.977469	0.246438	0.209299	0.956302	0.369361	-0.312667	-0.0295037	-0.264693	0.235189	0.0479734	0.283163
ENSG00000100028	SNRPD3	254.895	216.169	253.196	246.839	0.974686	0.838505	0.979133	0.762264	0.992648	0.781097	0.0459662	-0.189766	0.0363931	-0.22616	-0.00957309	-0.235733
ENSG00000100029	PES1	226.134	251.409	231.57	228.573	0.986145	0.758133	0.983975	0.715678	0.969892	0.814222	-0.0153421	0.136244	0.0186314	0.117613	0.0339735	0.151586
ENSG00000100030	MAPK1	87.0989	75.7932	90.4484	72.873	0.795754	0.983527	0.712695	0.905067	0.979996	0.855015	0.250962	0.0551985	0.304203	-0.249004	0.0532407	-0.195764
ENSG00000100031	GGT1	3.66021	8.89218	3.91371	4.3729	0.950218	0.568608	0.970351	0.449776	0.983844	0.450621	-0.171094	0.773271	-0.107887	0.881157	0.0632079	0.944365
ENSG00000100033	PRODH	0.671175	0.59453	0.663864	0.861021	0.925172	0.838647	0.904344	0.978474	0.996071	0.978474	-0.0990556	-0.141057	-0.10301	-0.0380472	-0.00395407	-0.0420013
ENSG00000100034	PPM1F	34.0903	45.8018	38.5864	39.0602	0.868559	0.85299	0.991807	0.619242	0.887395	0.833751	-0.18613	0.219324	-0.0167443	0.236069	0.169385	0.405454
ENSG00000100036	SLC35E4	3.87527	3.40348	3.14851	5.03306	0.50994	0.652968	0.0862881	0.926895	0.691449	0.969857	-0.259497	-0.380264	-0.449998	0.0697339	-0.1905	-0.120766
ENSG00000100038	TOP3B	9.95222	10.9761	12.1484	6.99822	0.565208	0.42597	0.11332	0.964604	0.843655	0.955197	0.409567	0.528145	0.652927	-0.124782	0.24336	0.118578
ENSG00000100056	DGCR14	13.26	16.8603	11.6502	17.1428	0.179556	0.986677	0.0125108	0.457254	0.721524	0.142675	-0.327047	-0.0214492	-0.48788	0.466431	-0.160833	0.305598
ENSG00000100058	CRYBB2P1	37.4483	46.4517	40.6897	49.2407	0.429883	0.965129	0.645699	0.726149	0.927749	0.87096	-0.377327	-0.0807429	-0.263402	0.182659	0.113925	0.296584
ENSG00000100065	CARD10	28.0974	35.5073	27.0521	31.4028	0.870066	0.810574	0.757889	0.482498	0.975707	0.297257	-0.15033	0.167202	-0.201327	0.368529	-0.0509964	0.317533
ENSG00000100068	LRP5L	0.211429	0.465933	0.134997	0.270576	1	0.611288	1	0.380139	1	0.108384	-0.0380794	0.119075	-0.0888243	0.2079	-0.0507449	0.157155
ENSG00000100075	SLC25A1	121.04	187.421	119.76	175.084	0.00176087	0.804472	0.00176087	0.00176087	0.986234	0.00176087	-0.525306	0.0971624	-0.540394	0.637556	-0.0150871	0.622469
ENSG00000100077	ADRBK2	1.09063	0.908526	0.964343	0.724855	0.531175	0.848878	0.74447	0.883614	0.935425	0.978474	0.181721	0.0941087	0.121533	-0.0274242	-0.0601886	-0.0876127
ENSG00000100078	PLA2G3	0.87236	0.608589	0.979897	1.17461	0.682881	0.170147	0.864431	0.651486	0.944471	0.450994	-0.144343	-0.28331	-0.0913169	-0.191993	0.0530259	-0.138967
ENSG00000100083	GGA1	28.13	36.3888	32.8133	28.0173	0.996629	0.58526	0.781292	0.587262	0.787134	0.920989	0.00540646	0.354891	0.213844	0.141047	0.208438	0.349485
ENSG00000100084	HIRA	24.3199	29.3612	21.8959	28.1722	0.748709	0.973426	0.390448	0.66881	0.840438	0.322716	-0.197066	0.0557609	-0.336457	0.392218	-0.139391	0.252827
ENSG00000100092	SH3BP1	1.43502	2.0932	2.50666	2.22118	0.87944	0.991549	0.982063	0.934981	0.810599	0.977955	-0.297328	-0.0444172	0.0944123	-0.138829	0.39174	0.252911
ENSG00000100097	LGALS1	604.013	417.632	627.714	457.584	0.00818108	0.723263	0.00176087	0.00176087	0.928105	0.00176087	0.39902	-0.131204	0.454368	-0.585572	0.055348	-0.530224
ENSG00000100099	HPS4	10.4116	16.3508	10.7123	13.6466	0.426735	0.81988	0.556167	0.337878	0.981782	0.398163	-0.33416	0.229994	-0.299624	0.529618	0.034536	0.564154
ENSG00000100104	SRRD	34.2519	34.712	31.1667	33.3481	0.987097	0.9812	0.964318	0.991807	0.934981	0.918595	0.0364239	0.054619	-0.0918972	0.146516	-0.128321	0.0181951
ENSG00000100105	PATZ1	12.2337	13.9212	10.1933	16.8528	0.0198035	0.322237	0.00176087	0.649679	0.421131	0.0400065	-0.405468	-0.24383	-0.62869	0.38486	-0.223222	0.161638
ENSG00000100106	TRIOBP	22.7747	17.9982	23.25	15.6829	0.150457	0.782426	0.0982614	0.464724	0.985759	0.374774	0.486513	0.177515	0.513928	-0.336413	0.0274158	-0.308997
ENSG00000100109	TFIP11	42.8299	46.3648	41.2297	44.8613	0.966521	0.981418	0.906681	0.946561	0.974686	0.886393	-0.0639357	0.0455605	-0.116374	0.161935	-0.0524385	0.109496
ENSG00000100116	GCAT	47.6076	48.0199	48.4415	49.9775	0.956714	0.975556	0.976767	0.992753	0.986275	0.992831	-0.0673261	-0.0553851	-0.0432761	-0.012109	0.02405	0.011941
ENSG00000100124	ANKRD54	26.3834	28.0362	26.816	24.2297	0.95234	0.901695	0.935603	0.973159	0.990709	0.979492	0.113846	0.195501	0.135669	0.0598322	0.0218227	0.0816549
ENSG00000100129	EIF3L	697.649	875.57	732.489	705.656	0.991807	0.713952	0.976767	0.697502	0.966709	0.780753	-0.0164169	0.310466	0.0536927	0.256773	0.0701096	0.326883
ENSG00000100138	NHP2L1	606.733	482.35	605.787	551.599	0.814935	0.815852	0.819834	0.605378	0.99738	0.611288	0.136968	-0.192791	0.134724	-0.327516	-0.00224376	-0.32976
ENSG00000100139	MICALL1	37.077	71.8252	41.2211	53.2961	0.101153	0.509017	0.330723	0.0198035	0.863402	0.0891068	-0.500858	0.416936	-0.355442	0.772378	0.145416	0.917794
ENSG00000100142	POLR2F	235.31	205.671	221.483	232.751	0.987128	0.619222	0.918595	0.557194	0.88132	0.840076	0.0156416	-0.176832	-0.0709662	-0.105865	-0.0866078	-0.192473
ENSG00000100147	CCDC134	4.21688	2.65893	3.68201	3.84267	0.94893	0.724315	0.982307	0.648015	0.925527	0.826951	0.0895629	-0.326629	-0.0402264	-0.286403	-0.129789	-0.416192
ENSG00000100150	DEPDC5	21.6055	26.5156	21.6607	50.7105	0.641399	0.682365	0.605627	0.962061	0.999489	0.957241	-1.15897	-0.886339	-1.1556	0.269259	0.00336971	0.272628
ENSG00000100151	PICK1	19.4524	24.187	18.674	20.9699	0.930964	0.886498	0.807167	0.796255	0.969634	0.708166	-0.0986055	0.189106	-0.151927	0.341033	-0.0533215	0.287712
ENSG00000100154	TTC28	5.33663	11.1096	6.97021	6.24892	0.944492	0.686579	0.969892	0.551753	0.858083	0.771274	-0.169088	0.668347	0.120937	0.54741	0.290024	0.837434
ENSG00000100162	CENPM	51.9141	59.9799	51.208	51.627	0.992831	0.684173	0.990688	0.699976	0.985941	0.65645	0.00770308	0.208841	-0.0113164	0.220157	-0.0190195	0.201138
ENSG00000100196	KDELR3	12.8542	7.85505	13.6966	9.71598	0.776069	0.91401	0.674819	0.611288	0.976618	0.54292	0.342393	-0.249543	0.421974	-0.671517	0.0795812	-0.591936
ENSG00000100201	DDX17	37.4531	43.13	37.6349	27.0143	0.00931705	0.0717915	0.00324853	0.741226	0.992831	0.753435	0.443375	0.637323	0.450007	0.187315	0.00663267	0.193948
ENSG00000100207	TCF20	15.1919	19.6165	16.9924	17.6128	0.629955	0.804262	0.966341	0.178185	0.713505	0.629629	-0.190067	0.140337	-0.0463733	0.186711	0.143693	0.330404
ENSG00000100209	HSCB	13.2225	8.97901	15.333	13.226	0.99964	0.766236	0.879953	0.78898	0.893634	0.673991	-0.00033167	-0.471789	0.186984	-0.658773	0.187316	-0.471457
ENSG00000100211	CBY1	10.5381	23.5558	10.565	21.157	0.00176087	0.834516	0.00176087	0.00176087	0.997569	0.00176087	-0.88513	0.142202	-0.882038	1.02424	0.00309193	1.02733
ENSG00000100216	TOMM22	115.179	115.444	123.729	110.103	0.93308	0.941885	0.667631	0.996629	0.860104	0.891744	0.0638892	0.0671481	0.165493	-0.0983444	0.101603	0.00325897
ENSG00000100219	XBP1	122.034	150.79	158.138	119.65	0.976011	0.0490283	0.0134839	0.0886496	0.0279957	0.908629	0.0279993	0.328814	0.396579	-0.0677656	0.36858	0.300814
ENSG00000100220	C22orf28	108.949	146.802	112.805	117.334	0.883273	0.329801	0.961961	0.105185	0.968512	0.203935	-0.105108	0.318389	-0.0558197	0.374208	0.0492888	0.423497
ENSG00000100221	JOSD1	74.5836	85.7827	75.6772	76.1529	0.988612	0.878838	0.995053	0.849128	0.991796	0.881462	-0.0292639	0.167637	-0.00880821	0.176445	0.0204557	0.196901
ENSG00000100225	FBXO7	82.6659	85.0877	85.4894	75.5223	0.778132	0.85146	0.648677	0.976794	0.954384	0.994387	0.12717	0.167858	0.174497	-0.00663926	0.0473272	0.0406879
ENSG00000100226	GTPBP1	30.2237	30.0083	33.7578	31.0709	0.987983	0.985622	0.963859	0.995872	0.944506	0.941675	-0.0374402	-0.0471163	0.112696	-0.159812	0.150136	-0.0096761
ENSG00000100227	POLDIP3	75.8604	76.5046	81.549	72.0834	0.958812	0.949721	0.80331	0.992541	0.931531	0.946561	0.0717394	0.0836269	0.173472	-0.0898454	0.101733	0.0118874
ENSG00000100234	TIMP3	18.5137	12.1443	18.5284	13.6966	0.0134839	0.643272	0.0134839	0.00176087	0.998181	0.00176087	0.386136	-0.150231	0.387169	-0.5374	0.00103346	-0.536367
ENSG00000100239	PPP6R2	19.8414	19.7657	19.4383	17.8739	0.739695	0.751974	0.812832	0.994184	0.978474	0.982624	0.13619	0.131181	0.109315	0.0218659	-0.0268748	-0.00500891
ENSG00000100241	SBF1	41.3362	58.897	38.5489	62.6318	0.11998	0.965866	0.0420311	0.340397	0.897618	0.209934	-0.576672	-0.085873	-0.672581	0.586708	-0.0959099	0.490799
ENSG00000100242	SUN2	26.6449	41.7421	27.1525	29.7164	0.947112	0.789101	0.959462	0.680414	0.990986	0.688356	-0.146951	0.463793	-0.121609	0.585403	0.0253413	0.610744
ENSG00000100243	CYB5R3	232.743	253.652	236.693	205.862	0.595794	0.347223	0.478998	0.840936	0.981195	0.883614	0.175456	0.298555	0.19953	0.0990251	0.0240741	0.123099
ENSG00000100246	DNAL4	3.99711	6.65762	3.40869	8.21082	0.378599	0.886617	0.226095	0.628328	0.959786	0.461755	-0.767759	-0.238056	-0.916748	0.678691	-0.148988	0.529703
ENSG00000100258	LMF2	44.6285	45.6899	43.5379	47.5292	0.890922	0.947297	0.798071	0.975707	0.975767	0.9238	-0.0870673	-0.0545956	-0.121212	0.066616	-0.0341443	0.0324717
ENSG00000100263	RHBDD3	16.9287	21.9374	16.3852	19.5706	0.930335	0.956403	0.89359	0.815037	0.988034	0.762433	-0.188491	0.1502	-0.230521	0.380722	-0.0420305	0.338691
ENSG00000100266	PACSIN2	42.3595	35.1947	41.6179	30.21	0.166283	0.746068	0.155855	0.668898	0.986677	0.69153	0.461734	0.207588	0.437412	-0.229823	-0.0243228	-0.254146
ENSG00000100271	TTLL1	1.06609	1.73066	1.82876	1.9184	0.253156	0.965866	0.983029	0.622572	0.459383	0.985091	-0.353865	-0.0708338	-0.0333874	-0.0374463	0.320477	0.283031
ENSG00000100280	AP1B1	67.5887	72.3155	67.7692	63.8722	0.869543	0.506227	0.846843	0.831963	0.99484	0.828519	0.0791833	0.173993	0.0829206	0.0910729	0.00373723	0.0948101
ENSG00000100281	HMGXB4	10.7642	14.7955	15.0439	12.9203	0.493749	0.748137	0.630928	0.140043	0.0478315	0.986234	-0.225173	0.170798	0.191979	-0.0211807	0.417152	0.395972
ENSG00000100284	TOM1	14.9366	18.0045	14.7317	21.9515	0.239058	0.7285	0.253704	0.780017	0.991261	0.769816	-0.499972	-0.259791	-0.517532	0.257741	-0.0175602	0.24018
ENSG00000100285	NEFH	12.9613	2.18683	13.9033	1.69609	0.00176087	0.533206	0.00176087	0.00176087	0.850162	0.00176087	2.01716	0.179858	2.10525	-1.9254	0.0880906	-1.83731
ENSG00000100288	CHKB	5.81368	7.81037	5.88214	9.33518	0.331107	0.871878	0.313423	0.755874	0.993501	0.750046	-0.536733	-0.208428	-0.524148	0.31572	0.0125852	0.328305
ENSG00000100290	BIK	0.341799	0.685984	1.00591	0.754598	0.452623	0.977469	0.862433	0.587259	0.223694	0.803461	-0.234225	-0.0363911	0.12596	-0.162351	0.360185	0.197833
ENSG00000100292	HMOX1	13.6489	13.1251	11.2384	16.7869	0.477065	0.275232	0.0587121	0.965281	0.59985	0.685643	-0.263666	-0.312782	-0.504998	0.192216	-0.241332	-0.0491166
ENSG00000100294	MCAT	45.7716	38.3742	44.5903	42.7086	0.872741	0.759844	0.941885	0.484511	0.974672	0.584738	0.0956008	-0.147119	0.0594772	-0.206596	-0.0361236	-0.24272
ENSG00000100296	THOC5	84.9019	87.9823	82.6568	83.3513	0.988116	0.966976	0.993317	0.978474	0.982307	0.954512	0.0259746	0.0762281	-0.0117872	0.0880153	-0.0377618	0.0502535
ENSG00000100297	MCM5	176.47	175.008	193.904	185.457	0.958948	0.947988	0.964604	0.992347	0.873466	0.851385	-0.0708781	-0.0827451	0.0635872	-0.146332	0.134465	-0.011867
ENSG00000100299	ARSA	6.5947	6.1249	6.69401	5.98423	0.886391	0.984755	0.853633	0.939152	0.98902	0.909401	0.106294	0.0251968	0.122868	-0.0976717	0.0165745	-0.0810972
ENSG00000100300	TSPO	134.847	176.999	141.96	134.288	0.993494	0.293693	0.898977	0.305504	0.911314	0.461235	0.00590527	0.393293	0.0790095	0.314284	0.0731042	0.387388
ENSG00000100304	TTLL12	133.089	138.435	141.899	131.243	0.983952	0.907026	0.812417	0.947933	0.874854	0.9751	0.0198505	0.0758428	0.110997	-0.035154	0.0911464	0.0559923
ENSG00000100307	CBX7	0.98133	2.33861	1.01715	1.94165	0.145185	0.879685	0.405424	0.0459494	0.988612	0.233587	-0.402844	0.138433	-0.385613	0.524046	0.0172303	0.541277
ENSG00000100311	PDGFB	9.3656	4.27228	10.055	8.91293	0.969871	0.0163159	0.87096	0.0104001	0.941885	0.00176087	0.0586353	-0.798977	0.143593	-0.94257	0.0849578	-0.857612
ENSG00000100316	RPL3	1779.73	1750.2	1853.61	1877.34	0.867816	0.785501	0.982791	0.977944	0.920884	0.849933	-0.0769474	-0.101059	-0.0183326	-0.0827261	0.0586148	-0.0241113
ENSG00000100319	ZMAT5	14.0081	12.4884	14.6876	14.5421	0.976982	0.788924	0.992159	0.871499	0.967789	0.761393	-0.0473403	-0.191244	0.0126341	-0.203878	0.0599744	-0.143904
ENSG00000100320	RBFOX2	132.047	102.314	129.54	95.7684	0.854853	0.984109	0.872184	0.924516	0.994184	0.935524	0.455299	0.0934926	0.428061	-0.334569	-0.0272374	-0.361806
ENSG00000100324	TAB1	18.5195	75.2187	21.1816	25.7815	0.451386	0.603158	0.751903	0.464611	0.903852	0.527304	-0.437129	1.47483	-0.261144	1.73597	0.175985	1.91195
ENSG00000100325	ASCC2	91.7701	107.359	124.125	77.6764	0.891212	0.770907	0.60266	0.929172	0.791291	0.960075	0.234976	0.456848	0.66263	-0.205782	0.427654	0.221872
ENSG00000100330	MTMR3	8.80133	15.922	8.00743	9.46482	0.974744	0.756058	0.890612	0.615206	0.931489	0.55392	-0.0860047	0.644518	-0.196142	0.84066	-0.110137	0.730523
ENSG00000100335	SMCR7L	45.2427	45.5514	40.3421	46.8945	0.960361	0.97676	0.586353	0.992541	0.7285	0.773647	-0.0495808	-0.0401844	-0.207579	0.167395	-0.157999	0.0093964
ENSG00000100342	APOL1	1.64227	6.32471	2.14225	3.53671	0.0478315	0.243719	0.429749	0.00176087	0.798765	0.0154383	-0.604191	0.588371	-0.418614	1.00699	0.185577	1.19256
ENSG00000100344	PNPLA3	7.03428	7.66248	6.51624	8.88421	0.966077	0.981565	0.947297	0.987983	0.98816	0.978474	-0.268755	-0.171771	-0.353948	0.182177	-0.085193	0.0969839
ENSG00000100345	MYH9	916.939	299.599	987.653	257.368	0.0544748	0.9613	0.0325417	0.15163	0.983975	0.0858175	1.82497	0.217631	1.93192	-1.71429	0.106954	-1.60734
ENSG00000100347	SAMM50	87.3182	69.8211	91.0127	70.6305	0.22048	0.988151	0.107893	0.248465	0.944013	0.122827	0.298379	-0.0161678	0.356852	-0.37302	0.0584735	-0.314546
ENSG00000100348	TXN2	92.1838	101.605	95.8033	106.62	0.475435	0.94384	0.691048	0.813864	0.947858	0.924846	-0.205739	-0.0681961	-0.151335	0.0831386	0.0544042	0.137543
ENSG00000100350	FOXRED2	71.5545	78.4084	74.3774	70.8995	0.992541	0.91377	0.966551	0.928966	0.975767	0.970145	0.0129047	0.141437	0.0672369	0.0742004	0.0543322	0.128533
ENSG00000100353	EIF3D	249.54	291.132	262.84	211.003	0.268978	0.224362	0.0622683	0.662052	0.886631	0.805738	0.239914	0.460677	0.314247	0.146429	0.0743332	0.220763
ENSG00000100354	TNRC6B	8.02635	14.3436	8.99517	9.51501	0.886393	0.695071	0.97983	0.422308	0.934344	0.58732	-0.199719	0.50521	-0.0666458	0.571856	0.133073	0.704929
ENSG00000100359	SGSM3	34.0175	38.482	31.8484	37.3836	0.930531	0.984319	0.825218	0.899073	0.966077	0.789101	-0.128897	0.0396856	-0.218507	0.258193	-0.0896104	0.168583
ENSG00000100360	IFT27	17.3355	50.4295	16.914	20.2966	0.790308	0.559057	0.725374	0.470393	0.984619	0.460281	-0.205572	1.23356	-0.237369	1.47092	-0.0317976	1.43913
ENSG00000100364	KIAA0930	142.724	149.369	156.608	142.901	0.998212	0.958765	0.84801	0.959462	0.855253	0.955465	-0.00176336	0.0630022	0.130398	-0.0673958	0.132161	0.0647656
ENSG00000100372	SLC25A17	49.2889	47.066	55.382	53.4088	0.882521	0.813089	0.964328	0.970588	0.788078	0.734377	-0.111468	-0.175391	0.0504831	-0.225875	0.161952	-0.063923
ENSG00000100376	FAM118A	11.4955	29.4105	12.3411	12.593	0.948617	0.0599193	0.990203	0.02647	0.967755	0.0483894	-0.112798	1.10597	-0.0251208	1.13109	0.0876773	1.21877
ENSG00000100380	ST13	442.813	447.64	452.9	437.931	0.989056	0.982049	0.970653	0.98969	0.980225	0.989344	0.0159217	0.0314931	0.0482722	-0.0167791	0.0323505	0.0155714
ENSG00000100385	IL2RB	0.418233	0.191567	0.457009	0.671597	0.852803	0.342905	0.911084	0.655791	0.986071	0.628752	-0.143749	-0.28574	-0.120799	-0.16494	0.0229499	-0.14199
ENSG00000100387	RBX1	24.296	24.4282	22.5438	23.0469	0.977446	0.978474	0.989029	0.997041	0.968225	0.973586	0.0702113	0.0774461	-0.0292734	0.10672	-0.0994847	0.00723481
ENSG00000100393	EP300	15.1473	12.1353	14.8076	11.5002	0.0134839	0.884114	0.0249185	0.0544748	0.969871	0.111179	0.345001	0.0663217	0.316133	-0.249811	-0.0288677	-0.278679
ENSG00000100395	L3MBTL2	30.3143	29.5524	27.9523	37.5028	0.457137	0.32114	0.196803	0.978474	0.889963	0.939386	-0.289782	-0.324205	-0.399288	0.075083	-0.109506	-0.034423
ENSG00000100401	RANGAP1	131.054	198.099	127.186	197.769	0.00176087	0.996629	0.00176087	0.00176087	0.960197	0.00176087	-0.586321	0.00238123	-0.628883	0.631264	-0.0425622	0.588702
ENSG00000100403	ZC3H7B	27.9073	34.5967	28.6464	35.4831	0.0325417	0.964604	0.0678264	0.0587121	0.962782	0.117869	-0.325743	-0.0345267	-0.290523	0.255996	0.0352199	0.291216
ENSG00000100410	PHF5A	232.501	364.932	185.889	271.007	0.878906	0.826768	0.464128	0.718217	0.775302	0.569575	-0.219344	0.426575	-0.539057	0.965632	-0.319713	0.645919
ENSG00000100412	ACO2	76.4985	71.5271	81.8381	68.2926	0.726463	0.959442	0.395916	0.921967	0.877886	0.720808	0.159292	0.0649033	0.254233	-0.18933	0.0949409	-0.094389
ENSG00000100413	POLR3H	82.0775	83.6632	83.9048	87.2774	0.954362	0.973586	0.975762	0.987652	0.985866	0.996629	-0.0865752	-0.0596194	-0.0555563	-0.00406317	0.031019	0.0269558
ENSG00000100416	TRMU	53.7782	44.7865	53.8721	53.2946	0.990145	0.450994	0.98902	0.387003	0.997063	0.42597	0.0125628	-0.241046	0.0149895	-0.256036	0.00242667	-0.253609
ENSG00000100417	PMM1	9.32744	17.6561	10.3588	12.8832	0.215473	0.301306	0.498713	0.00324853	0.870541	0.0225126	-0.393863	0.401292	-0.268146	0.669438	0.125717	0.795155
ENSG00000100418	DESI1	100.322	62.2929	104.713	86.8524	0.889045	0.7499	0.827599	0.585842	0.980765	0.546537	0.203634	-0.466751	0.264253	-0.731005	0.0606196	-0.670385
ENSG00000100422	CERK	23.405	17.1902	25.8431	11.7628	0.0125108	0.484408	0.00176087	0.64007	0.926123	0.402849	0.884338	0.479596	1.01655	-0.53695	0.132207	-0.404743
ENSG00000100425	BRD1	6.35928	6.84329	5.21283	8.28976	0.156442	0.405058	0.00176087	0.885468	0.435694	0.14327	-0.299759	-0.218554	-0.512572	0.294018	-0.212813	0.0812045
ENSG00000100426	ZBED4	9.44487	7.95012	9.03567	8.64809	0.78749	0.803901	0.938433	0.374486	0.935762	0.599077	0.104106	-0.0978088	0.0515796	-0.149388	-0.0525269	-0.201915
ENSG00000100429	HDAC10	6.45738	7.01873	7.22725	9.76507	0.476021	0.66475	0.655418	0.969892	0.943561	0.988666	-0.476227	-0.383514	-0.350537	-0.0329765	0.12569	0.0927135
ENSG00000100439	ABHD4	45.4095	6.68276	5.30806	9.1159	0.29686	0.294284	0.00582385	0.157784	0.0886496	0.522691	2.09255	-0.356399	-0.605064	0.248665	-2.69762	-2.44895
ENSG00000100441	KHNYN	13.3111	20.3929	15.3852	17.6561	0.532437	0.876051	0.848972	0.363511	0.854853	0.63506	-0.360399	0.188064	-0.177117	0.365182	0.183282	0.548463
ENSG00000100442	FKBP3	47.9125	39.6018	47.6212	44.8317	0.880954	0.66893	0.901974	0.354056	0.991945	0.396525	0.0919158	-0.170839	0.0834712	-0.254311	-0.00844454	-0.262755
ENSG00000100445	SDR39U1	39.2248	37.5236	38.5383	36.834	0.97315	0.990414	0.979852	0.981418	0.99087	0.987983	0.0861922	0.025394	0.0619653	-0.0365712	-0.0242269	-0.0607981
ENSG00000100461	RBM23	93.4638	98.1564	94.2737	103.617	0.963147	0.984622	0.967174	0.985938	0.995506	0.988008	-0.145816	-0.0765875	-0.133628	0.057041	0.012188	0.0692289
ENSG00000100462	PRMT5	290.266	427.219	281.208	257.46	0.88085	0.506981	0.912083	0.65637	0.982287	0.596416	0.17177	0.726202	0.12635	0.599852	-0.04542	0.554432
ENSG00000100478	AP4S1	2.25742	1.36389	1.9767	2.64942	0.961635	0.733007	0.905967	0.7965	0.970351	0.891499	-0.127071	-0.46692	-0.225479	-0.241441	-0.0984077	-0.339849
ENSG00000100479	POLE2	16.1223	10.9639	15.2677	10.7761	0.361779	0.992487	0.457489	0.653188	0.970335	0.709701	0.504319	0.0210523	0.434628	-0.413576	-0.0696901	-0.483266
ENSG00000100483	METTL21D	2.67468	2.37639	2.03135	3.23673	0.871209	0.709862	0.470807	0.950601	0.794153	0.92542	-0.163799	-0.258925	-0.377403	0.118478	-0.213605	-0.0951263
ENSG00000100485	SOS2	2.23073	2.81915	2.7504	2.54279	0.891543	0.925527	0.949474	0.709701	0.740428	0.986677	-0.102672	0.0852001	0.0644704	0.0207297	0.167142	0.187872
ENSG00000100490	CDKL1	5.3679	10.6188	1.71816	13.8168	0.149993	0.935721	0.00176087	0.718217	0.0272824	0.203305	-1.10213	-0.325883	-2.0888	1.76291	-0.986665	0.776249
ENSG00000100503	NIN	13.6428	13.1299	17.9793	11.4244	0.891744	0.964318	0.671195	0.985736	0.747925	0.83749	0.220641	0.172545	0.573648	-0.401104	0.353007	-0.0480963
ENSG00000100504	PYGL	11.54	12.0784	13.5582	11.3787	0.986636	0.926984	0.544895	0.95547	0.610177	0.787286	0.0172898	0.0735454	0.217737	-0.144192	0.200447	0.0562556
ENSG00000100519	PSMC6	116.076	118.255	117.829	94.9519	0.444397	0.399047	0.37543	0.983432	0.986074	0.995396	0.284375	0.310756	0.305636	0.00511978	0.0212613	0.0263811
ENSG00000100522	GNPNAT1	59.1647	54.6328	55.3148	40.5866	0.379217	0.542741	0.285234	0.960361	0.956993	0.991807	0.5223	0.411238	0.428508	-0.0172699	-0.0937915	-0.111061
ENSG00000100523	DDHD1	2.2186	2.43741	2.46059	1.73586	0.450994	0.222614	0.158073	0.886393	0.856404	0.991945	0.175324	0.248277	0.255794	-0.00751669	0.0804702	0.0729536
ENSG00000100526	CDKN3	55.0912	48.5467	49.6423	44.3246	0.490091	0.897739	0.846338	0.789008	0.846338	0.984346	0.30149	0.125838	0.156775	-0.0309363	-0.144715	-0.175651
ENSG00000100528	CNIH	106.449	119.22	106.49	108.628	0.982287	0.852899	0.982503	0.812665	0.999533	0.826812	-0.0286998	0.131911	-0.0281545	0.160066	0.000545319	0.160611
ENSG00000100532	CGRRF1	5.57162	13.4925	8.9615	8.54128	0.603497	0.369361	0.980629	0.0895333	0.52956	0.448172	-0.477376	0.55552	0.0563952	0.499125	0.533771	1.0329
ENSG00000100554	ATP6V1D	52.2979	52.8071	44.7716	42.5919	0.811189	0.800974	0.978383	0.994029	0.877665	0.868654	0.284115	0.297581	0.0688511	0.22873	-0.215264	0.0134664
ENSG00000100558	PLEK2	4.5372	9.19688	4.05322	5.87251	0.755264	0.385597	0.523335	0.0649905	0.941092	0.0163159	-0.268151	0.508201	-0.379121	0.887322	-0.11097	0.776352
ENSG00000100564	PIGH	15.6421	26.3376	14.7908	12.7854	0.783485	0.426655	0.853707	0.621655	0.976767	0.560168	0.254849	0.938544	0.183498	0.755047	-0.0713513	0.683695
ENSG00000100567	PSMA3	385.927	398.27	378.244	350.421	0.870656	0.877743	0.91167	0.982307	0.984755	0.96989	0.138485	0.183674	0.109626	0.074048	-0.0288597	0.0451883
ENSG00000100568	VTI1B	88.7143	104.565	88.9659	99.2055	0.874447	0.966863	0.923212	0.736215	0.997063	0.835403	-0.157886	0.074446	-0.15389	0.228336	0.00399584	0.232332
ENSG00000100575	TIMM9	54.1347	61.2863	44.5779	44.184	0.792372	0.75136	0.994184	0.938817	0.77988	0.724381	0.2815	0.4545	0.0122525	0.442248	-0.269247	0.173
ENSG00000100577	GSTZ1	10.4403	19.5097	11.9122	17.4761	0.0858175	0.908678	0.32998	0.0365309	0.898219	0.173909	-0.646684	0.143283	-0.485354	0.628637	0.161329	0.789966
ENSG00000100578	KIAA0586	7.64874	16.2347	7.98964	7.46055	0.990042	0.653188	0.975767	0.661422	0.983527	0.677906	0.0284165	0.946691	0.0785086	0.868182	0.0500921	0.918274
ENSG00000100580	TMED8	3.01433	4.54736	2.94816	3.42582	0.69097	0.0796852	0.597117	0.00176087	0.979705	0.00176087	-0.113784	0.271072	-0.132949	0.404021	-0.0191648	0.384856
ENSG00000100583	SAMD15	0.168698	0.544694	0.140781	0.35405	0.805865	0.92542	0.756223	0.762647	1	0.733645	-0.118316	0.112347	-0.137008	0.249355	-0.0186919	0.230663
ENSG00000100591	AHSA1	509.449	392.644	507.071	469.197	0.832716	0.55508	0.86602	0.271395	0.993509	0.295056	0.11826	-0.255779	0.111537	-0.367315	-0.0067235	-0.374039
ENSG00000100592	DAAM1	9.65981	5.66561	9.42799	8.67937	0.973586	0.708278	0.980359	0.667345	0.993494	0.726731	0.126718	-0.478354	0.0977451	-0.576099	-0.0289726	-0.605072
ENSG00000100596	SPTLC2	22.2008	14.7573	16.913	16.6636	0.732061	0.957562	0.992541	0.694899	0.796951	0.957701	0.374827	-0.155438	0.0191509	-0.174589	-0.355677	-0.530265
ENSG00000100600	LGMN	17.127	18.2074	17.6142	16.0047	0.919674	0.741969	0.841517	0.940114	0.978474	0.974267	0.087237	0.16651	0.123525	0.0429852	0.0362879	0.0792731
ENSG00000100601	ALKBH1	8.02659	6.66567	7.76475	7.41254	0.921036	0.893405	0.969524	0.721852	0.978474	0.819269	0.091175	-0.119273	0.052999	-0.172272	-0.038176	-0.210448
ENSG00000100603	SNW1	73.883	30.9608	75.4193	34.8047	0.00176087	0.93268	0.00176087	0.0279957	0.98438	0.0257461	1.04389	-0.159139	1.0728	-1.23194	0.0289165	-1.20303
ENSG00000100605	ITPK1	55.8421	45.5161	62.285	44.6837	0.762838	0.990352	0.549414	0.781552	0.930514	0.566282	0.309201	0.0254975	0.461563	-0.436066	0.152362	-0.283704
ENSG00000100612	DHRS7	35.2083	41.7737	36.3794	37.5245	0.948357	0.886393	0.980353	0.69097	0.976871	0.793033	-0.0871227	0.147317	-0.0424151	0.189732	0.0447077	0.23444
ENSG00000100614	PPM1A	12.9979	16.8447	11.9669	12.6773	0.985108	0.75935	0.96516	0.754973	0.923212	0.654243	0.0311739	0.360572	-0.0715748	0.432147	-0.102749	0.329398
ENSG00000100625	SIX4	2.85652	4.02023	7.67647	2.13831	0.612066	0.0332405	0.00176087	0.438719	0.00176087	0.00324853	0.230881	0.540777	1.22544	-0.684662	0.994558	0.309896
ENSG00000100629	CEP128	3.53987	3.34679	3.65928	2.67813	0.735212	0.920989	0.676201	0.984874	0.986229	0.976138	0.24392	0.192741	0.274687	-0.0819455	0.0307664	-0.0511791
ENSG00000100632	ERH	160.098	158.495	170.049	136.215	0.520662	0.741264	0.313423	0.99087	0.913441	0.931834	0.229952	0.215614	0.315905	-0.100291	0.0859532	-0.0143379
ENSG00000100644	HIF1A	61.4378	67.1564	71.0227	60.4657	0.989042	0.882091	0.800316	0.915706	0.841657	0.966486	0.0222785	0.146799	0.225281	-0.0784822	0.203002	0.12452
ENSG00000100647	KIAA0247	1.09904	1.17511	1.11842	1.55235	0.355878	0.481291	0.360209	0.958908	0.989905	0.972289	-0.196952	-0.161967	-0.187958	0.0259913	0.00899387	0.0349852
ENSG00000100650	SRSF5	168.869	170.479	169.136	186.789	0.754973	0.80152	0.752722	0.989718	0.997036	0.990712	-0.143884	-0.130354	-0.141631	0.0112774	0.0022526	0.01353
ENSG00000100664	EIF5	312.46	127.567	276.946	137.38	0.00176087	0.948246	0.00176087	0.00176087	0.781089	0.00704704	1.17385	-0.105325	1.00096	-1.10629	-0.172891	-1.27918
ENSG00000100697	DICER1	18.8317	15.5964	17.0168	10.0136	0.627868	0.806073	0.670233	0.962315	0.978474	0.98152	0.794112	0.550612	0.662606	-0.111994	-0.131506	-0.2435
ENSG00000100711	ZFYVE21	12.6379	6.49742	11.8314	9.17695	0.378768	0.329801	0.588813	0.00176087	0.954462	0.00818108	0.389182	-0.39543	0.307421	-0.70285	-0.0817614	-0.784612
ENSG00000100714	MTHFD1	173.847	183.658	195.214	139.567	0.569731	0.428611	0.235297	0.959293	0.845952	0.955014	0.312836	0.391162	0.478277	-0.0871145	0.165441	0.0783268
ENSG00000100722	ZC3H14	47.4407	45.7235	54.4225	46.5313	0.988034	0.989573	0.760096	0.980932	0.821978	0.777016	0.0267837	-0.0242157	0.217355	-0.241571	0.190571	-0.0509993
ENSG00000100726	TELO2	42.3156	85.0797	44.9553	68.7568	0.00176087	0.58232	0.07918	0.00324853	0.935688	0.00931705	-0.675054	0.299468	-0.591581	0.891048	0.0834734	0.974522
ENSG00000100731	PCNX	11.9229	9.28621	13.7242	11.6919	0.993924	0.918781	0.964318	0.902597	0.969921	0.806073	0.0241371	-0.278762	0.199664	-0.478426	0.175527	-0.302899
ENSG00000100739	BDKRB1	0.0562346	0.186851	0.536325	0.0403578	1	1	0.234468	1	0.0767071	0.71324	0.0111827	0.100033	0.313917	-0.213885	0.302735	0.0888501
ENSG00000100744	GSKIP	14.0497	11.9174	10.5303	10.5365	0.885881	0.977611	0.999739	0.965786	0.880524	0.976794	0.356412	0.150755	-0.00071367	0.151469	-0.357125	-0.205657
ENSG00000100749	VRK1	20.0696	17.6619	21.8294	14.0159	0.298284	0.69097	0.174535	0.851422	0.921435	0.695932	0.462556	0.295898	0.573238	-0.27734	0.110682	-0.166658
ENSG00000100764	PSMC1	113.761	192.106	128.486	88.6016	0.575818	0.426631	0.227545	0.626671	0.880235	0.709634	0.353541	1.09924	0.526287	0.57295	0.172746	0.745695
ENSG00000100767	PAPLN	1.23485	1.89931	1.33166	1.80114	0.626855	0.978371	0.655801	0.449324	0.966551	0.438675	-0.232733	0.0367867	-0.190191	0.226978	0.0425424	0.26952
ENSG00000100784	RPS6KA5	1.3114	1.85503	1.55344	1.54042	0.890134	0.893947	0.99484	0.69097	0.87096	0.896801	-0.0964792	0.122822	0.00529582	0.117526	0.101775	0.219301
ENSG00000100796	SMEK1	40.8904	33.9738	34.3658	44.2011	0.917986	0.55115	0.464866	0.750595	0.716623	0.992159	-0.107272	-0.360981	-0.345345	-0.0156358	-0.238072	-0.253708
ENSG00000100802	C14orf93	5.28362	4.67371	3.60014	8.09719	0.337522	0.674573	0.00582385	0.959489	0.472999	0.8736	-0.471226	-0.597393	-0.850419	0.253026	-0.379193	-0.126167
ENSG00000100804	PSMB5	203.132	214.438	214.906	212.305	0.920169	0.98787	0.984848	0.88854	0.876711	0.995956	-0.0631129	0.0142883	0.0174045	-0.00311615	0.0805174	0.0774012
ENSG00000100811	YY1	71.096	83.0175	78.5562	73.9988	0.980607	0.935842	0.972316	0.871162	0.930964	0.977036	-0.0561842	0.161783	0.084019	0.0777642	0.140203	0.217967
ENSG00000100813	ACIN1	63.3162	52.9854	65.5329	59.9769	0.933014	0.745515	0.843673	0.543284	0.967995	0.412462	0.0757103	-0.172682	0.12386	-0.296542	0.0481497	-0.248392
ENSG00000100814	CCNB1IP1	20.4148	21.655	21.6374	43.5575	0.0617376	0.0420311	0.00324853	0.978824	0.975812	0.999581	-1.02324	-0.945543	-0.946617	0.00107381	0.0766197	0.0776935
ENSG00000100815	TRIP11	13.4443	32.1608	11.9484	16.1813	0.84326	0.423979	0.602867	0.240535	0.934153	0.155146	-0.235381	0.909886	-0.382356	1.29224	-0.146975	1.14527
ENSG00000100823	APEX1	165.216	158.012	174.643	160.518	0.967415	0.983681	0.80929	0.937813	0.903567	0.758085	0.0411134	-0.0224194	0.120237	-0.142656	0.0791237	-0.0635328
ENSG00000100836	PABPN1	88.1294	87.1786	86.7228	77.5227	0.688866	0.844884	0.751061	0.991777	0.985167	0.994716	0.180631	0.165331	0.157938	0.00739266	-0.0226929	-0.0153002
ENSG00000100852	ARHGAP5	18.5862	30.2292	19.2992	21.7057	0.807167	0.713887	0.930454	0.420062	0.977724	0.511111	-0.203556	0.443134	-0.154435	0.597569	0.0491217	0.646691
ENSG00000100865	CINP	46.952	36.444	47.6556	44.4763	0.936126	0.448172	0.898219	0.221132	0.985622	0.156442	0.0748726	-0.273737	0.0954612	-0.369198	0.0205886	-0.348609
ENSG00000100867	DHRS2	0.551672	0.357329	0.456272	0.575557	0.988328	0.845524	0.913413	0.860973	0.934981	0.948923	-0.0134416	-0.127731	-0.0684141	-0.0593172	-0.0549726	-0.11429
ENSG00000100883	SRP54	27.7111	52.2229	28.0218	27.0359	0.978778	0.35366	0.970973	0.38103	0.990145	0.390871	0.0331643	0.901065	0.0481727	0.852892	0.0150085	0.8679
ENSG00000100888	CHD8	34.8559	44.4752	28.5614	39.0345	0.953637	0.947795	0.696326	0.83192	0.850354	0.50265	-0.154942	0.179624	-0.425127	0.60475	-0.270185	0.334565
ENSG00000100889	PCK2	10.7891	19.8907	12.6221	17.2923	0.633226	0.959939	0.765797	0.5687	0.940136	0.680295	-0.59311	0.182293	-0.399875	0.582168	0.193236	0.775403
ENSG00000100890	KIAA0391	36.511	40.8528	39.6572	39.9374	0.954586	0.99026	0.995506	0.945844	0.961961	0.988162	-0.122967	0.0311521	-0.00967155	0.0408236	0.113295	0.154119
ENSG00000100897	DCAF11	57.4202	72.392	58.5009	72.7402	0.605429	0.996071	0.625404	0.616361	0.987097	0.637047	-0.330931	-0.00673694	-0.304928	0.298191	0.0260031	0.324194
ENSG00000100902	PSMA6	292.274	268.864	321.94	273.181	0.9455	0.990098	0.792733	0.925859	0.896536	0.776069	0.0967792	-0.0228122	0.235346	-0.258158	0.138567	-0.119591
ENSG00000100906	NFKBIA	54.3052	272.847	256.41	39.6031	0.557776	0.00176087	0.00176087	0.00176087	0.00176087	0.95547	0.436577	2.72387	2.6349	0.0889668	2.19832	2.28729
ENSG00000100908	EMC9	17.8523	19.7262	20.7348	22.4791	0.726149	0.898219	0.954586	0.942146	0.876711	0.977469	-0.302244	-0.172115	-0.106648	-0.0654664	0.195596	0.13013
ENSG00000100911	PSME2	160.27	208.821	155.288	201.034	0.29739	0.964604	0.234158	0.183309	0.975032	0.133286	-0.323325	0.0542972	-0.368313	0.42261	-0.0449877	0.377622
ENSG00000100916	BRMS1L	3.69362	4.49979	5.31542	3.64556	0.991558	0.762129	0.295056	0.759639	0.262912	0.823836	0.0122295	0.203276	0.373824	-0.170548	0.361594	0.191047
ENSG00000100918	REC8	1.34559	2.04408	1.01011	2.28453	0.852517	0.984269	0.683407	0.908678	0.945263	0.77504	-0.356876	-0.0833254	-0.509321	0.425995	-0.152444	0.273551
ENSG00000100926	TM9SF1	35.077	37.9403	35.1368	37.47	0.975397	0.993524	0.977058	0.970527	0.998727	0.973651	-0.090232	0.0170886	-0.087907	0.104996	0.00232499	0.107321
ENSG00000100934	SEC23A	31.1289	40.0827	30.9107	40.586	0.48753	0.99215	0.470009	0.630537	0.993753	0.610177	-0.362289	-0.017152	-0.371823	0.354671	-0.00953359	0.345137
ENSG00000100938	GMPR2	90.7726	161.888	93.9335	154.466	0.860158	0.992487	0.882351	0.842414	0.992831	0.867158	-0.754079	0.066861	-0.705743	0.772604	0.0483359	0.82094
ENSG00000100941	PNN	54.8812	49.666	61.6689	54.8549	0.999533	0.906444	0.848972	0.896954	0.83647	0.632685	0.000667209	-0.138069	0.163304	-0.301374	0.162637	-0.138737
ENSG00000100949	RABGGTA	29.5968	35.2442	38.7863	24.1721	0.570107	0.705244	0.0104001	0.863402	0.345294	0.942934	0.271749	0.508986	0.640055	-0.131069	0.368306	0.237237
ENSG00000100979	PLTP	0.488081	0.136316	0.220963	0.244508	0.882746	1	1	0.660349	0.845717	1	0.148634	-0.0712742	-0.0152139	-0.0560603	-0.163848	-0.219908
ENSG00000100982	PCIF1	20.6199	22.213	20.2299	25.6209	0.174535	0.50994	0.141633	0.840057	0.979957	0.771488	-0.288168	-0.189978	-0.313259	0.12328	-0.0250911	0.0981893
ENSG00000100983	GSS	43.541	44.4483	45.171	42.8408	0.981527	0.945897	0.897727	0.976767	0.946561	0.981418	0.022354	0.0508138	0.0730882	-0.0222744	0.0507342	0.0284598
ENSG00000100991	TRPC4AP	34.5219	38.1116	36.0028	37.1288	0.804939	0.965281	0.955073	0.671177	0.926678	0.87206	-0.099469	0.0357886	-0.0421251	0.0779138	0.0573439	0.135258
ENSG00000100994	PYGB	35.5105	39.9933	37.0159	39.8141	0.78898	0.995288	0.893954	0.78583	0.956375	0.890688	-0.156695	0.00616965	-0.0999273	0.106097	0.0567677	0.162865
ENSG00000100997	ABHD12	36.5143	40.1636	32.6647	43.4583	0.81657	0.95108	0.539285	0.930514	0.900219	0.686888	-0.23915	-0.108546	-0.391076	0.282531	-0.151927	0.130604
ENSG00000101000	PROCR	5.74967	7.45534	5.6824	5.70154	0.997291	0.941744	0.999174	0.937797	0.996311	0.939858	0.00898792	0.295982	-0.00358987	0.299572	-0.0125778	0.286994
ENSG00000101003	GINS1	4.91664	8.35302	5.22964	6.35874	0.579175	0.747838	0.733071	0.334812	0.957148	0.423143	-0.273214	0.308694	-0.209362	0.518056	0.0638524	0.581908
ENSG00000101004	NINL	0.770195	0.92669	0.781443	1.25704	0.652809	0.902905	0.69097	0.946047	0.993753	0.958125	-0.233574	-0.154291	-0.227728	0.0734364	0.00584601	0.0792824
ENSG00000101019	UQCC	103.671	187.609	98.2308	131.876	0.756223	0.6691	0.653953	0.341445	0.978474	0.271395	-0.341318	0.50213	-0.417571	0.919702	-0.0762536	0.843448
ENSG00000101040	ZMYND8	12.9461	21.4949	23.2332	19.9329	0.197096	0.947457	0.84597	0.10336	0.136427	0.959076	-0.553327	0.099251	0.202227	-0.102976	0.755554	0.652579
ENSG00000101052	IFT52	13.7369	22.5671	14.1719	14.5402	0.967863	0.18852	0.986275	0.119587	0.983975	0.210701	-0.0718253	0.570751	-0.0324875	0.603238	0.0393378	0.642576
ENSG00000101057	MYBL2	242.695	184.659	237.192	189.338	0.0104001	0.961961	0.0317807	0.00458804	0.965544	0.0163159	0.354861	-0.0357184	0.322046	-0.357764	-0.0328155	-0.39058
ENSG00000101076	HNF4A	0.341759	0.295031	0.393904	0.298526	0.965544	1	0.870792	0.97736	0.963306	0.932137	0.0268836	-0.00219534	0.0586563	-0.0608517	0.0317727	-0.029079
ENSG00000101079	NDRG3	21.7938	30.4892	23.2154	22.4744	0.968756	0.213061	0.966778	0.137512	0.892376	0.29156	-0.0406878	0.408687	0.0430316	0.365655	0.0837194	0.449375
ENSG00000101084	C20orf24	222.536	195.201	229.022	186.826	0.374087	0.934981	0.222614	0.60509	0.969634	0.446715	0.249889	0.0626094	0.290973	-0.228363	0.0410835	-0.18728
ENSG00000101104	PABPC1L	0.35822	0.193683	0.458675	0.622625	0.674483	0.148422	0.882172	0.545797	0.903556	0.29455	-0.153313	-0.257656	-0.0931305	-0.164526	0.0601827	-0.104343
ENSG00000101109	STK4	9.88409	13.7985	9.75201	10.0889	0.989042	0.731016	0.981418	0.732538	0.991807	0.686733	-0.0246515	0.386105	-0.0407754	0.42688	-0.0161239	0.410756
ENSG00000101115	SALL4	3.45281	1.87552	4.33106	2.85276	0.870627	0.462586	0.398163	0.20775	0.800284	0.0225126	0.168194	-0.324416	0.383642	-0.708057	0.215447	-0.49261
ENSG00000101126	ADNP	33.1216	36.882	29.9428	32.266	0.980293	0.82083	0.920434	0.858739	0.843359	0.615184	0.0355808	0.182325	-0.101287	0.283612	-0.136868	0.146744
ENSG00000101132	PFDN4	71.9118	63.2222	70.998	67.7895	0.924816	0.903333	0.953261	0.712437	0.988409	0.770329	0.0827947	-0.0976469	0.0648469	-0.162494	-0.0179478	-0.180442
ENSG00000101138	CSTF1	38.848	45.8285	30.7572	42.3008	0.897727	0.912167	0.193547	0.646828	0.398163	0.0346294	-0.117067	0.110538	-0.435521	0.546059	-0.318453	0.227605
ENSG00000101146	RAE1	59.3276	74.5765	64.012	72.0856	0.64166	0.978474	0.836634	0.602764	0.935688	0.78016	-0.272657	0.0477086	-0.166465	0.214173	0.106192	0.320365
ENSG00000101150	TPD52L2	44.8719	78.6893	44.6809	83.2202	0.00176087	0.874028	0.00176087	0.00176087	0.993068	0.00176087	-0.862472	-0.0788181	-0.868363	0.789545	-0.0058909	0.783654
ENSG00000101152	DNAJC5	13.0715	23.9082	13.8216	25.4067	0.00458804	0.934418	0.00582385	0.00176087	0.96067	0.0241497	-0.862706	-0.0811198	-0.792633	0.711513	0.0700725	0.781586
ENSG00000101158	TH1L	141.879	66.0118	140.137	69.7278	0.00176087	0.936446	0.00176087	0.00176087	0.987999	0.00176087	1.00425	-0.0767473	0.986678	-1.06343	-0.0175739	-1.081
ENSG00000101160	CTSZ	337.111	357.907	344.046	348.911	0.938106	0.962746	0.980359	0.830652	0.970969	0.921618	-0.0493476	0.036519	-0.0201413	0.0566603	0.0292062	0.0858666
ENSG00000101161	PRPF6	72.3716	67.8787	75.1693	74.0632	0.973293	0.782225	0.982287	0.871146	0.940985	0.707363	-0.0324468	-0.122346	0.0208284	-0.143174	0.0532752	-0.089899
ENSG00000101166	SLMO2	174.023	137.246	185.412	150.008	0.585228	0.9028	0.32864	0.57777	0.904275	0.449682	0.211617	-0.126511	0.302066	-0.428577	0.0904494	-0.338128
ENSG00000101181	GTPBP5	45.3367	35.6039	39.3723	45.1549	0.994891	0.41365	0.74085	0.388808	0.720645	0.85741	0.00555144	-0.326525	-0.188743	-0.137783	-0.194294	-0.332077
ENSG00000101182	PSMA7	425.813	366.482	440.714	405.763	0.891113	0.667695	0.733735	0.395732	0.943351	0.242445	0.0692494	-0.146137	0.118644	-0.264781	0.0493947	-0.215386
ENSG00000101187	SLCO4A1	65.5206	56.6131	73.0762	58.9547	0.789581	0.956302	0.402849	0.595414	0.796924	0.225503	0.14759	-0.0565143	0.300618	-0.357132	0.153028	-0.204105
ENSG00000101189	MRGBP	23.1839	33.1537	22.5192	26.3693	0.63125	0.158073	0.507368	0.00931705	0.970611	0.00458804	-0.171829	0.309346	-0.210419	0.519765	-0.0385898	0.481175
ENSG00000101190	TCFL5	6.63798	6.541	6.80331	5.68396	0.738455	0.789745	0.65644	0.989042	0.982287	0.973468	0.168844	0.152555	0.196196	-0.0436411	0.0273521	-0.016289
ENSG00000101191	DIDO1	16.7249	21.6672	17.2998	17.9292	0.869171	0.315442	0.955197	0.0987371	0.959671	0.155855	-0.0899258	0.248005	-0.0462979	0.294303	0.0436279	0.337931
ENSG00000101193	GID8	21.216	28.5014	22.3371	29.7561	0.0163159	0.946561	0.0574364	0.0562965	0.932956	0.174868	-0.451914	-0.0581583	-0.383876	0.325718	0.0680378	0.393756
ENSG00000101199	ARFGAP1	51.5306	48.7714	50.9464	48.9342	0.965215	0.996639	0.973586	0.962061	0.990414	0.970335	0.0717291	-0.00461864	0.0558979	-0.0605166	-0.0158312	-0.0763478
ENSG00000101213	PTK6	3.47456	5.26342	3.78663	6.22426	0.0125108	0.782537	0.0644441	0.235297	0.941199	0.455651	-0.587143	-0.179237	-0.507162	0.327926	0.0799804	0.407906
ENSG00000101216	GMEB2	11.2247	17.1459	13.1609	14.5536	0.0599193	0.355275	0.710907	0.00176087	0.429883	0.0406367	-0.32391	0.20989	-0.12679	0.33668	0.19712	0.5338
ENSG00000101220	C20orf27	96.3449	90.8736	99.0219	99.7331	0.949889	0.71301	0.99026	0.872422	0.965003	0.759144	-0.048867	-0.131449	-0.0101211	-0.121328	0.0387459	-0.0825817
ENSG00000101222	SPEF1	0.20814	0.350596	0.157037	0.522092	0.198196	0.881798	0.0617376	0.858083	1	0.754973	-0.191789	-0.101594	-0.22557	0.123976	-0.0337807	0.090195
ENSG00000101224	CDC25B	85.2525	89.8584	79.4019	99.1089	0.905243	0.948923	0.792733	0.98007	0.971815	0.929129	-0.212642	-0.138426	-0.312776	0.174349	-0.100134	0.0742152
ENSG00000101236	RNF24	6.36636	6.8155	5.96775	5.94168	0.912083	0.704394	0.994716	0.913982	0.921912	0.719519	0.0751558	0.150598	0.00472815	0.14587	-0.0704277	0.0754423
ENSG00000101246	ARFRP1	13.7848	21.3204	11.6395	25.4694	0.0862881	0.841715	0.0198035	0.470861	0.882011	0.205244	-0.799289	-0.236233	-1.01003	0.773802	-0.210745	0.563057
ENSG00000101247	NDUFAF5	28.944	32.8864	32.2004	29.0997	0.994512	0.880336	0.895701	0.868603	0.883614	0.98787	-0.00724096	0.165764	0.137113	0.0286515	0.144353	0.173005
ENSG00000101255	TRIB3	24.5773	17.7471	22.0152	22.8098	0.849456	0.15163	0.961037	0.0180295	0.71324	0.276123	0.0992844	-0.329269	-0.0469623	-0.282307	-0.146247	-0.428554
ENSG00000101266	CSNK2A1	48.4297	53.6447	51.4514	39.7926	0.357874	0.0826771	0.122358	0.806073	0.913982	0.958812	0.271026	0.412997	0.35498	0.0580165	0.0839541	0.141971
ENSG00000101290	CDS2	12.8233	20.8555	14.3998	13.6499	0.970653	0.297627	0.9751	0.0844611	0.896414	0.192434	-0.0782868	0.546388	0.0675248	0.478863	0.145812	0.624675
ENSG00000101294	HM13	210.681	167.725	209.072	132.916	0.00176087	0.652625	0.00176087	0.653953	0.991974	0.676494	0.65663	0.331138	0.645674	-0.314536	-0.0109559	-0.325492
ENSG00000101310	SEC23B	48.0979	45.5416	48.0071	46.2874	0.963859	0.986229	0.966127	0.943467	0.997089	0.946561	0.0531033	-0.0224563	0.0504862	-0.0729425	-0.00261719	-0.0755597
ENSG00000101311	FERMT1	17.1441	16.6389	18.3139	20.5154	0.759132	0.725374	0.898656	0.983975	0.959462	0.936266	-0.234012	-0.272595	-0.148445	-0.124151	0.0855674	-0.0385831
ENSG00000101337	TM9SF4	31.4119	37.3626	35.0877	47.456	0.0982614	0.53611	0.339407	0.729422	0.877202	0.952633	-0.565784	-0.32932	-0.415205	0.0858847	0.150579	0.236463
ENSG00000101343	CRNKL1	15.7242	23.5093	15.6556	14.6952	0.957829	0.565274	0.96139	0.637702	0.996205	0.631768	0.0862871	0.61159	0.0806925	0.530897	-0.00559466	0.525303
ENSG00000101346	POFUT1	25.3087	37.0899	24.8393	32.4428	0.243719	0.709242	0.255426	0.0279957	0.984967	0.0325417	-0.334842	0.182593	-0.359855	0.542449	-0.0250136	0.517435
ENSG00000101347	SAMHD1	5.58317	8.02699	5.12956	6.77918	0.418225	0.506383	0.131214	0.0134839	0.844884	0.00176087	-0.211285	0.19173	-0.300273	0.492004	-0.088988	0.403016
ENSG00000101350	KIF3B	18.2971	17.8036	19.0402	15.8094	0.585435	0.702615	0.36508	0.9739	0.953745	0.883674	0.188635	0.153124	0.24051	-0.0873857	0.0518748	-0.0355109
ENSG00000101361	NOP56	275.406	254.664	280.946	261.802	0.906466	0.968512	0.839112	0.815037	0.977944	0.743615	0.0725435	-0.0395745	0.101071	-0.140646	0.0285278	-0.112118
ENSG00000101363	MANBAL	37.7089	33.6799	36.1031	36.0118	0.935842	0.883431	0.995956	0.703472	0.941044	0.87223	0.0630151	-0.0913358	0.00346103	-0.0947968	-0.059554	-0.154351
ENSG00000101365	IDH3B	68.3968	69.731	66.7108	63.5447	0.862433	0.775918	0.925563	0.980359	0.975707	0.938162	0.103031	0.130118	0.0680578	0.0620599	-0.034973	0.0270869
ENSG00000101367	MAPRE1	75.1842	90.9846	75.596	88.0509	0.268146	0.943633	0.29641	0.11613	0.991616	0.134782	-0.222435	0.0462511	-0.214758	0.26101	0.00767673	0.268686
ENSG00000101384	JAG1	4.19789	2.72405	5.48494	2.69762	0.0134839	0.991258	0.00176087	0.0134839	0.152395	0.00176087	0.399847	0.00809422	0.672061	-0.663967	0.272214	-0.391753
ENSG00000101391	CDK5RAP1	36.5818	30.4356	40.5942	34.034	0.906946	0.899174	0.591945	0.795557	0.834516	0.631506	0.0985616	-0.151781	0.241298	-0.393079	0.142737	-0.250342
ENSG00000101400	SNTA1	12.3342	10.2995	12.6587	11.9544	0.970319	0.612792	0.921682	0.482498	0.976767	0.352888	0.0387413	-0.18212	0.0710371	-0.253157	0.0322958	-0.220862
ENSG00000101407	TTI1	21.7731	25.6544	20.3178	24.3865	0.893564	0.978421	0.685511	0.887034	0.942576	0.744819	-0.15047	0.067709	-0.241605	0.309314	-0.0911352	0.218179
ENSG00000101412	E2F1	29.0554	33.9893	27.141	35.7889	0.125205	0.897727	0.0215676	0.378262	0.845039	0.0951374	-0.283118	-0.0703945	-0.374912	0.304518	-0.0917938	0.212724
ENSG00000101413	RPRD1B	18.8493	20.5796	20.2773	20.762	0.947157	0.994184	0.988034	0.969858	0.973213	0.992831	-0.126628	-0.0116074	-0.0310529	0.0194455	0.0955754	0.115021
ENSG00000101417	PXMP4	2.53453	3.192	2.31405	1.9097	0.781127	0.442316	0.891486	0.832485	0.965786	0.704252	0.213895	0.409232	0.141985	0.267247	-0.0719101	0.195337
ENSG00000101421	CHMP4B	97.3097	85.6048	97.5	95.5313	0.977469	0.587384	0.9751	0.477065	0.996175	0.467031	0.0260694	-0.154855	0.0288312	-0.183687	0.00276189	-0.180925
ENSG00000101439	CST3	57.206	36.385	54.6201	46.1625	0.262287	0.262287	0.488636	0.00324853	0.942554	0.0125108	0.297833	-0.327368	0.233404	-0.560772	-0.0644291	-0.625201
ENSG00000101442	ACTR5	9.11955	6.88697	7.94107	8.03889	0.751061	0.67898	0.989142	0.21688	0.70271	0.720808	0.147499	-0.175836	-0.0141267	-0.16171	-0.161625	-0.323335
ENSG00000101444	AHCY	205.962	239.365	218.637	227.604	0.590215	0.883259	0.920884	0.29739	0.835547	0.675962	-0.142828	0.0720687	-0.057473	0.129542	0.0853548	0.214897
ENSG00000101447	FAM83D	40.589	28.2171	23.8769	39.0521	0.938307	0.00582385	0.00176087	0.00176087	0.00176087	0.365203	0.0530248	-0.442091	-0.665791	0.2237	-0.718816	-0.495116
ENSG00000101452	DHX35	6.40176	6.36904	5.72821	8.71394	0.661767	0.620053	0.488291	0.99641	0.943739	0.942965	-0.350726	-0.356355	-0.471283	0.114928	-0.120557	-0.00562943
ENSG00000101457	DNTTIP1	17.1471	21.8429	18.2236	17.3364	0.990092	0.432092	0.948896	0.398163	0.931371	0.611462	-0.0141933	0.30224	0.0647206	0.23752	0.0789139	0.316434
ENSG00000101464	PIGU	44.2994	65.3895	46.2803	50.1663	0.7285	0.261583	0.87096	0.0426481	0.958719	0.0923632	-0.172125	0.369406	-0.111683	0.481089	0.0604411	0.54153
ENSG00000101473	ACOT8	11.288	26.2138	12.3483	12.1622	0.947795	0.514276	0.99026	0.464242	0.928948	0.526311	-0.0919214	0.994356	0.0188344	0.975521	0.110756	1.08628
ENSG00000101474	APMAP	18.593	23.1673	20.0509	21.5746	0.525312	0.882039	0.852517	0.289313	0.846534	0.605855	-0.195079	0.0943172	-0.0963958	0.190713	0.0986835	0.289396
ENSG00000101544	ADNP2	8.99851	8.57151	10.9754	7.98184	0.834516	0.935793	0.302617	0.963983	0.640373	0.497105	0.13993	0.0828038	0.378401	-0.295598	0.238471	-0.0571266
ENSG00000101546	RBFA	16.4956	15.0767	15.9196	14.8661	0.822239	0.991807	0.916659	0.939503	0.969858	0.970611	0.133056	0.0179028	0.087412	-0.0695092	-0.0456437	-0.115153
ENSG00000101557	USP14	71.1657	21.7703	72.4963	22.261	0.00176087	0.981418	0.00176087	0.00176087	0.980765	0.00176087	1.59253	-0.0294789	1.61853	-1.64801	0.0260013	-1.62201
ENSG00000101558	VAPA	165.725	153.185	164.371	130.202	0.172861	0.721905	0.202256	0.909393	0.990414	0.925172	0.343354	0.231245	0.33166	-0.100415	-0.0116938	-0.112109
ENSG00000101574	METTL4	8.00895	6.7182	5.95485	7.59757	0.981418	0.940366	0.788476	0.887492	0.710306	0.937815	0.0605496	-0.138639	-0.270834	0.132196	-0.331384	-0.199188
ENSG00000101577	LPIN2	3.47456	3.38833	2.75754	4.3641	0.661649	0.624443	0.0872365	0.986229	0.566441	0.666878	-0.217213	-0.240118	-0.419741	0.179622	-0.202527	-0.0229048
ENSG00000101596	SMCHD1	20.1314	18.1265	17.2879	14.5603	0.43426	0.69794	0.644527	0.941885	0.800665	0.970806	0.418366	0.281368	0.219967	0.0614002	-0.198399	-0.136998
ENSG00000101608	MYL12A	343.234	225.441	346.228	267.033	0.130006	0.590805	0.10336	0.0233574	0.990145	0.0207025	0.359791	-0.242291	0.372249	-0.61454	0.0124577	-0.602082
ENSG00000101624	CEP76	10.2693	6.52501	12.708	12.1089	0.94302	0.555944	0.984381	0.736215	0.890439	0.46588	-0.201553	-0.726832	0.0599956	-0.786828	0.261548	-0.52528
ENSG00000101639	CEP192	3.12059	4.0058	3.6705	3.09799	0.995053	0.842829	0.82282	0.823859	0.806294	0.960197	0.00638151	0.236428	0.153547	0.0828805	0.147166	0.230046
ENSG00000101654	RNMT	12.2825	20.3356	13.2533	15.7281	0.762973	0.731323	0.887152	0.285061	0.971398	0.456632	-0.311789	0.333307	-0.216917	0.550224	0.0948729	0.645096
ENSG00000101665	SMAD7	10.375	6.34813	7.7042	9.03621	0.903852	0.604178	0.888979	0.358368	0.669504	0.8664	0.165184	-0.40272	-0.185564	-0.217156	-0.350747	-0.567904
ENSG00000101680	LAMA1	138.033	25.4171	137.041	22.6749	0.00176087	0.662296	0.00176087	0.00176087	0.990414	0.00176087	2.50465	0.152032	2.49439	-2.34236	-0.0102565	-2.35262
ENSG00000101695	RNF125	1.81837	1.02631	1.51564	2.02992	0.97736	0.725869	0.890213	0.7285	0.935842	0.844884	-0.0777943	-0.413191	-0.196964	-0.216228	-0.11917	-0.335397
ENSG00000101745	ANKRD12	10.8754	9.78271	9.49716	9.07429	0.961997	0.984346	0.989042	0.980629	0.975707	0.992627	0.217403	0.0894572	0.0540633	0.0353939	-0.16334	-0.127946
ENSG00000101751	POLI	2.2554	1.90664	1.75549	1.54277	0.784645	0.904914	0.961854	0.940622	0.888151	0.976767	0.264417	0.141051	0.0841233	0.0569272	-0.180294	-0.123366
ENSG00000101752	MIB1	4.51803	4.35204	5.24306	6.47104	0.396992	0.29702	0.786391	0.965281	0.814935	0.672772	-0.378103	-0.415319	-0.22594	-0.189379	0.152163	-0.037216
ENSG00000101773	RBBP8	39.1889	42.1643	43.4938	33.8927	0.826231	0.689732	0.569123	0.958205	0.914207	0.983975	0.198565	0.29919	0.341979	-0.0427893	0.143414	0.100625
ENSG00000101782	RIOK3	11.4297	19.7197	11.322	10.4769	0.864102	0.119143	0.942064	0.219452	0.992756	0.314034	0.106168	0.799745	0.0945512	0.705193	-0.0116164	0.693577
ENSG00000101811	CSTF2	47.3035	45.939	51.8214	43.353	0.826257	0.95073	0.437712	0.978474	0.807339	0.826811	0.120492	0.0800018	0.246982	-0.16698	0.12649	-0.0404903
ENSG00000101843	PSMD10	50.7272	53.9018	50.7094	60.1837	0.481735	0.748769	0.460858	0.909401	0.999378	0.904914	-0.237989	-0.153642	-0.238476	0.0848345	-0.000487117	0.0843474
ENSG00000101844	ATG4A	7.82021	10.5631	7.00942	9.19645	0.876809	0.891543	0.672611	0.600702	0.934103	0.323802	-0.189216	0.166151	-0.313535	0.479686	-0.12432	0.355367
ENSG00000101846	STS	4.12532	1.51632	4.10428	1.63598	0.00176087	0.923539	0.00176087	0.00176087	0.993309	0.00176087	0.752441	-0.0482779	0.747477	-0.795755	-0.00496408	-0.800719
ENSG00000101849	TBL1X	45.0121	57.8111	46.1868	57.3388	0.696963	0.994184	0.742343	0.684513	0.986378	0.72739	-0.335944	0.0114375	-0.300338	0.311775	0.0356059	0.347381
ENSG00000101856	PGRMC1	69.8607	77.3881	71.7246	76.7467	0.682052	0.98902	0.81657	0.633641	0.964763	0.783853	-0.132016	0.0117033	-0.0950734	0.106777	0.0369431	0.14372
ENSG00000101868	POLA1	44.0239	47.2764	45.682	44.1803	0.993753	0.810479	0.945354	0.78287	0.931918	0.940793	-0.0048943	0.0936193	0.0461672	0.0474521	0.0510615	0.0985136
ENSG00000101871	MID1	24.5257	20.8213	28.5624	23.3576	0.970104	0.911374	0.684864	0.800316	0.765743	0.427252	0.0649726	-0.152037	0.26934	-0.421377	0.204367	-0.21701
ENSG00000101882	NKAP	25.5405	23.7807	25.9319	27.2645	0.882878	0.599077	0.926123	0.873275	0.983975	0.814935	-0.0875969	-0.18286	-0.0672379	-0.115622	0.020359	-0.0952633
ENSG00000101888	NXT2	11.2322	10.5656	11.8958	13.1068	0.773161	0.675289	0.899144	0.958719	0.954362	0.870792	-0.191145	-0.265719	-0.120549	-0.145169	0.0705959	-0.0745734
ENSG00000101898	RP3-324O17.4	15.1816	15.5258	15.821	14.1479	0.987097	0.982287	0.978474	0.994184	0.991558	0.994809	0.0895178	0.118134	0.142232	-0.024098	0.0527139	0.0286159
ENSG00000101901	ALG13	41.8933	41.0408	36.6026	39.0674	0.929559	0.967415	0.93928	0.987097	0.788482	0.876216	0.0960071	0.0677113	-0.0892956	0.157007	-0.185303	-0.0282958
ENSG00000101911	PRPS2	55.6065	65.7428	61.5172	55.3775	0.995516	0.663191	0.867529	0.662454	0.873501	0.943067	0.0057465	0.239583	0.146662	0.0929203	0.140916	0.233836
ENSG00000101928	MOSPD1	50.5245	52.3113	49.5143	47.3712	0.942554	0.851553	0.964157	0.974686	0.984685	0.942554	0.0893208	0.137583	0.0613033	0.0762794	-0.0280176	0.0482619
ENSG00000101935	AMMECR1	6.51492	4.31348	6.96354	3.33631	0.00324853	0.666871	0.00176087	0.350357	0.896801	0.235509	0.67415	0.242593	0.748226	-0.505633	0.0740756	-0.431558
ENSG00000101940	WDR13	181.6	131.302	180.194	135.562	0.248807	0.982063	0.264056	0.335447	0.991796	0.354056	0.416484	-0.0453836	0.405393	-0.450777	-0.0110906	-0.461868
ENSG00000101945	SUV39H1	53.8215	35.6841	52.3527	37.1764	0.0125108	0.956714	0.0249185	0.00176087	0.974744	0.00458804	0.510836	-0.0560289	0.472367	-0.528396	-0.0384692	-0.566865
ENSG00000101966	XIAP	6.74989	12.5433	6.567	10.9832	0.55141	0.933572	0.480552	0.324646	0.991074	0.257808	-0.569309	0.163709	-0.599784	0.763493	-0.0304748	0.733018
ENSG00000101972	STAG2	66.2394	71.8729	67.1547	70.7053	0.984675	0.993494	0.987652	0.976764	0.99484	0.978982	-0.0914556	0.0229847	-0.0722332	0.0952179	0.0192223	0.11444
ENSG00000101974	ATP11C	19.0532	28.6218	22.9341	16.2163	0.718894	0.462471	0.223694	0.62718	0.639809	0.814207	0.20881	0.749329	0.45289	0.296439	0.244081	0.54052
ENSG00000101977	MCF2	1.32264	1.07277	1.17384	0.924789	0.595849	0.922702	0.794058	0.843359	0.933862	0.963983	0.183997	0.0712072	0.117897	-0.0466896	-0.0661006	-0.11279
ENSG00000101986	ABCD1	92.2811	63.9564	93.4944	73.644	0.467564	0.825218	0.390552	0.33655	0.990145	0.302285	0.317743	-0.197713	0.33619	-0.533903	0.0184475	-0.515456
ENSG00000101997	CCDC22	30.2923	31.574	30.3199	30.7819	0.981418	0.977955	0.982287	0.961037	0.998048	0.962061	-0.0217093	0.034445	-0.0204767	0.0549217	0.00123253	0.0561542
ENSG00000102003	SYP	0.268664	0.202675	0.418946	0.562873	0.250546	0.0831236	0.836183	1	0.702306	0.400151	-0.175919	-0.218505	-0.0833834	-0.135122	0.0925356	-0.0425863
ENSG00000102007	PLP2	832.488	666.116	828.881	726.149	0.362944	0.689731	0.382965	0.0309815	0.992487	0.0353284	0.196658	-0.124135	0.190408	-0.314543	-0.00624944	-0.320793
ENSG00000102024	PLS3	236.598	194.116	246.934	208.274	0.770724	0.944161	0.648677	0.692292	0.966451	0.605727	0.182311	-0.100563	0.243493	-0.344056	0.0611813	-0.282875
ENSG00000102030	NAA10	314.346	328.076	315.204	287.36	0.933138	0.875493	0.926869	0.978474	0.997293	0.978683	0.128638	0.189933	0.132545	0.0573873	0.00390761	0.0612949
ENSG00000102034	ELF4	25.0039	23.8592	26.4341	17.3911	0.0445736	0.626855	0.00458804	0.971482	0.917367	0.887738	0.477773	0.415283	0.552227	-0.136944	0.0744544	-0.0624901
ENSG00000102038	SMARCA1	0.594175	0.199564	0.359734	0.61122	0.990414	0.043231	0.472479	0.07918	0.553066	0.463159	-0.00944821	-0.247506	-0.1461	-0.101407	-0.136652	-0.238058
ENSG00000102048	ASB9	14.2165	17.4513	14.9533	12.9777	0.947881	0.683484	0.87096	0.846748	0.97736	0.888649	0.114646	0.37705	0.17875	0.1983	0.0641036	0.262404
ENSG00000102054	RBBP7	1258.38	1391.56	1305.69	1223.57	0.98152	0.849719	0.94729	0.906229	0.977446	0.95632	0.0404059	0.185322	0.0935677	0.0917545	0.0531618	0.144916
ENSG00000102078	SLC25A14	12.7942	27.0038	12.9176	19.1243	0.155481	0.289313	0.223694	0.00176087	0.992831	0.00176087	-0.513872	0.457338	-0.501888	0.959226	0.0119838	0.97121
ENSG00000102081	FMR1	19.0801	25.3583	18.215	19.6441	0.986378	0.826231	0.967995	0.782863	0.980939	0.76465	-0.0380921	0.338005	-0.0985476	0.436552	-0.0604555	0.376097
ENSG00000102096	PIM2	9.44161	18.0512	6.94498	21.5344	0.00176087	0.407337	0.00176087	0.00176087	0.14405	0.00176087	-1.04048	-0.231082	-1.39562	1.16454	-0.35514	0.809399
ENSG00000102098	SCML2	6.80102	8.84964	5.6516	8.72943	0.637154	0.988839	0.0503208	0.552754	0.755501	0.0180295	-0.285831	0.0160737	-0.48774	0.503814	-0.201909	0.301905
ENSG00000102100	SLC35A2	43.0897	68.0527	41.7423	64.2809	0.00324853	0.93313	0.00176087	0.0272824	0.961924	0.0125108	-0.555795	0.0798475	-0.599564	0.679412	-0.0437688	0.635643
ENSG00000102103	PQBP1	520.399	664.462	570.645	481.856	0.940366	0.582854	0.770724	0.696228	0.912472	0.864978	0.110574	0.461945	0.243063	0.218882	0.132489	0.35137
ENSG00000102119	EMD	206.949	175.174	212.767	192.184	0.806706	0.73292	0.684105	0.343686	0.964604	0.236899	0.105727	-0.132257	0.145348	-0.277605	0.0396215	-0.237984
ENSG00000102125	TAZ	26.9366	27.2249	23.8206	24.4991	0.980873	0.981418	0.992465	0.997168	0.977446	0.977955	0.126952	0.141255	-0.0374208	0.178676	-0.164373	0.0143027
ENSG00000102144	PGK1	890.92	812.883	917.619	779.176	0.671195	0.951642	0.544588	0.846263	0.976274	0.744819	0.192883	0.0609453	0.235389	-0.174443	0.0425053	-0.131938
ENSG00000102158	MAGT1	32.2251	20.6323	31.6816	18.0094	0.00176087	0.684673	0.00176087	0.00176087	0.982624	0.00176087	0.774377	0.177705	0.751283	-0.573577	-0.0230941	-0.596672
ENSG00000102172	SMS	339.291	358.257	344.537	339.069	0.998396	0.882878	0.978824	0.884772	0.980359	0.934981	0.000938737	0.0789628	0.0229458	0.0560171	0.022007	0.0780241
ENSG00000102178	UBL4A	84.9192	124.778	73.4919	114.908	0.133639	0.903096	0.0125108	0.139336	0.696963	0.0257461	-0.427627	0.116931	-0.63098	0.747911	-0.203353	0.544558
ENSG00000102181	CD99L2	18.2424	23.8734	19.3577	25.3721	0.0700596	0.924516	0.193846	0.261835	0.937813	0.463731	-0.435326	-0.0812365	-0.35795	0.276713	0.0773759	0.354089
ENSG00000102189	EEA1	6.55343	8.20131	5.93239	6.8884	0.983975	0.892909	0.908678	0.839997	0.95547	0.585618	-0.0554207	0.198759	-0.164168	0.362927	-0.108747	0.254179
ENSG00000102195	GPR50	1.33811	0.672204	1.60895	0.895781	0.569666	0.799487	0.266753	0.195582	0.863517	0.0689734	0.205079	-0.115922	0.317627	-0.433549	0.112548	-0.321001
ENSG00000102218	RP2	4.51104	5.09396	4.58614	4.3023	0.956375	0.60509	0.927653	0.767613	0.986234	0.814312	0.0470096	0.170713	0.0635547	0.107158	0.0165452	0.123703
ENSG00000102221	PHF16	11.1768	8.99386	13.6234	7.92889	0.376624	0.845329	0.134378	0.595632	0.736705	0.258088	0.408296	0.146994	0.654004	-0.50701	0.245708	-0.261302
ENSG00000102225	CDK16	207.013	234.081	215.447	214.899	0.966778	0.922993	0.997041	0.836573	0.966312	0.934981	-0.0534307	0.122259	0.0036404	0.118618	0.0570711	0.175689
ENSG00000102226	USP11	80.3033	113.735	77.8754	77.109	0.98438	0.718098	0.994765	0.78284	0.989056	0.779754	0.0571084	0.548911	0.0139094	0.535002	-0.043199	0.491803
ENSG00000102241	HTATSF1	61.536	60.0778	66.5912	61.9696	0.991137	0.967011	0.8506	0.975556	0.808605	0.740243	-0.0098122	-0.043309	0.100637	-0.143946	0.110449	-0.0334968
ENSG00000102265	TIMP1	357.451	272.526	348.641	257.196	0.489764	0.973159	0.493846	0.651969	0.987097	0.66196	0.471752	0.0828993	0.435951	-0.353052	-0.0358004	-0.388852
ENSG00000102287	GABRE	4.95365	4.1642	3.89411	3.25237	0.520295	0.793909	0.855324	0.897015	0.7761	0.971641	0.404802	0.230945	0.166305	0.0646397	-0.238496	-0.173857
ENSG00000102302	FGD1	19.9332	25.7154	19.6902	23.9277	0.384887	0.871146	0.334528	0.106119	0.987568	0.0826771	-0.241378	0.0961936	-0.257451	0.353644	-0.016073	0.337572
ENSG00000102309	PIN4	7.62089	8.57659	8.34357	9.48926	0.980359	0.989789	0.988666	0.989314	0.992159	0.996629	-0.256044	-0.119411	-0.151552	0.0321404	0.104492	0.136632
ENSG00000102312	PORCN	20.0035	26.7233	20.7409	27.0869	0.289545	0.990145	0.378768	0.451115	0.977944	0.541412	-0.402637	-0.018148	-0.35508	0.336932	0.0475563	0.384488
ENSG00000102316	MAGED2	83.0808	126.079	87.5051	82.2855	0.993753	0.631946	0.967951	0.663467	0.97736	0.700893	0.0135491	0.603678	0.0866854	0.516992	0.0731363	0.590128
ENSG00000102317	RBM3	220.512	164.021	222.939	174.313	0.225004	0.92542	0.209299	0.156774	0.989289	0.137133	0.335744	-0.0867731	0.351395	-0.438168	0.0156507	-0.422517
ENSG00000102384	CENPI	9.07164	8.26223	8.84676	6.3148	0.554661	0.760962	0.574292	0.954643	0.987608	0.968137	0.413115	0.303591	0.383511	-0.0799199	-0.0296048	-0.109525
ENSG00000102390	CXorf26	0.266823	0.139442	0.495465	0.338897	0.935086	0.739896	0.825283	1	0.614275	0.623902	-0.0451566	-0.128594	0.0934803	-0.222074	0.138637	-0.0834372
ENSG00000102393	GLA	78.1407	79.0963	77.9753	70.7091	0.912014	0.913227	0.914719	0.992368	0.997571	0.991523	0.140399	0.1575	0.137419	0.0200816	-0.00298061	0.017101
ENSG00000102452	NALCN	7.58042	7.99169	7.59404	5.21019	0.329801	0.34054	0.31594	0.976703	0.998048	0.976026	0.410052	0.470691	0.412101	0.0585903	0.00204955	0.0606398
ENSG00000102471	NDFIP2	45.9651	42.4154	49.3724	39.6619	0.677906	0.906935	0.348427	0.880418	0.903567	0.597924	0.203256	0.0923313	0.302265	-0.209933	0.0990084	-0.110925
ENSG00000102531	FNDC3A	15.7007	18.016	16.8866	15.8323	0.989616	0.514623	0.848822	0.506227	0.824936	0.845329	-0.0106864	0.166661	0.0828702	0.0837907	0.0935566	0.177347
ENSG00000102543	CDADC1	13.6439	22.4211	12.4581	21.011	0.257421	0.974256	0.146483	0.407633	0.950846	0.274176	-0.556723	0.0858045	-0.670446	0.75625	-0.113722	0.642528
ENSG00000102547	CAB39L	1.22755	15.3029	1.46802	1.8009	0.750592	0.202017	0.93722	0.0767071	0.940793	0.124917	-0.235902	2.1866	-0.132229	2.31883	0.103673	2.4225
ENSG00000102554	KLF5	40.5525	61.6581	64.7403	32.8213	0.223143	0.00176087	0.00176087	0.0478315	0.00176087	0.957701	0.289274	0.870374	0.938588	-0.0682141	0.649314	0.5811
ENSG00000102572	STK24	139.378	64.926	141.09	59.1005	0.00176087	0.919132	0.00176087	0.00176087	0.988839	0.00176087	1.2103	0.131383	1.22767	-1.09628	0.0173652	-1.07892
ENSG00000102580	DNAJC3	15.137	15.8439	15.378	14.8017	0.980607	0.902994	0.964318	0.9528	0.985759	0.974686	0.0285074	0.0868238	0.0486548	0.0381689	0.0201475	0.0583164
ENSG00000102595	UGGT2	8.95154	8.90204	8.73117	7.52913	0.810106	0.901185	0.842135	0.997168	0.98816	0.991949	0.200717	0.194182	0.171391	0.0227907	-0.0293264	-0.00653564
ENSG00000102606	ARHGEF7	15.544	23.2299	15.4442	15.9588	0.980741	0.179556	0.977517	0.185932	0.994512	0.207042	-0.0337132	0.490444	-0.0419435	0.532387	-0.00823028	0.524157
ENSG00000102699	PARP4	18.2371	15.9833	18.5931	16.0118	0.504907	0.996629	0.395291	0.490701	0.97736	0.375227	0.16806	-0.00228458	0.193219	-0.195503	0.0251585	-0.170345
ENSG00000102710	FAM48A	13.8539	20.3867	14.5698	8.44604	0.35014	0.447249	0.288899	0.774202	0.978474	0.819834	0.601882	1.09969	0.6656	0.434086	0.0637184	0.497804
ENSG00000102738	MRPS31	16.851	27.5877	16.2316	16.5373	0.98438	0.309008	0.98438	0.333757	0.968436	0.285458	0.0242099	0.674566	-0.02399	0.698556	-0.0481999	0.650356
ENSG00000102743	SLC25A15	20.2096	20.9592	20.1813	18.9897	0.908678	0.802192	0.936624	0.964126	0.998048	0.970145	0.0815019	0.129391	0.0796624	0.0497285	-0.00183949	0.047889
ENSG00000102753	KPNA3	33.1837	9.20218	33.3016	8.58817	0.00176087	0.908937	0.00176087	0.00176087	0.993753	0.00176087	1.73245	0.0813263	1.73728	-1.65595	0.00482637	-1.65113
ENSG00000102763	VWA8	10.3933	13.1872	12.2348	8.48786	0.722796	0.512821	0.426735	0.793033	0.843943	0.974686	0.24084	0.534136	0.440702	0.0934337	0.199862	0.293296
ENSG00000102780	DGKH	0.956744	0.535404	1.13348	0.405552	0.0459494	0.790003	0.0114792	0.22148	0.852517	0.061101	0.297641	0.0758477	0.381398	-0.30555	0.0837564	-0.221794
ENSG00000102781	KATNAL1	5.09898	2.83027	3.73766	2.5357	0.121132	0.972535	0.655555	0.748201	0.779417	0.924807	0.646287	0.0907786	0.339137	-0.248359	-0.307149	-0.555508
ENSG00000102786	INTS6	39.7445	28.6525	35.9667	31.2852	0.724863	0.95547	0.890625	0.633558	0.946561	0.801188	0.326705	-0.118876	0.189854	-0.30873	-0.136852	-0.445581
ENSG00000102796	DHRS12	1.20045	1.69615	1.45732	2.24835	0.627677	0.869699	0.747344	0.838262	0.946377	0.954237	-0.408628	-0.200879	-0.297248	0.0963692	0.111379	0.207749
ENSG00000102804	TSC22D1	96.0977	103.327	131.857	91.7723	0.912167	0.592168	0.00176087	0.816641	0.00176087	0.0508851	0.0650575	0.167642	0.513459	-0.345817	0.448401	0.102584
ENSG00000102805	CLN5	14.9109	11.7409	15.3359	14.9327	0.998981	0.881865	0.989344	0.872126	0.98882	0.852071	-0.00185859	-0.301336	0.0339507	-0.335286	0.0358093	-0.299477
ENSG00000102854	MSLN	42.9957	46.9823	48.2116	36.8646	0.938307	0.876062	0.834516	0.976794	0.964922	0.991807	0.21133	0.333804	0.369564	-0.0357602	0.158234	0.122473
ENSG00000102858	MGRN1	46.4492	80.3257	54.0055	61.2705	0.482375	0.78293	0.866413	0.573689	0.847695	0.707317	-0.38506	0.37981	-0.175964	0.555774	0.209096	0.76487
ENSG00000102870	ZNF629	6.64803	4.00387	6.00352	4.23649	0.00458804	0.947091	0.0617376	0.00324853	0.759639	0.0189271	0.471637	-0.0548415	0.3599	-0.414742	-0.111737	-0.526479
ENSG00000102871	TRADD	7.27951	8.12113	7.64063	10.9584	0.678743	0.676658	0.68559	0.95547	0.986229	0.97736	-0.481767	-0.356517	-0.426688	0.070171	0.0550788	0.12525
ENSG00000102878	HSF4	19.8594	2.6324	4.13125	3.44765	0.442415	0.914076	0.947819	0.342149	0.505121	0.763187	2.00455	-0.233874	0.170547	-0.404421	-1.834	-2.23842
ENSG00000102882	MAPK3	134.908	137.529	144.518	115.91	0.77152	0.702354	0.556708	0.987513	0.94517	0.964763	0.215521	0.242879	0.313392	-0.0705129	0.0978712	0.0273583
ENSG00000102886	GDPD3	1.03289	0.948984	1.43703	4.05311	0.0198035	0.0154383	0.107097	0.974686	0.727715	0.647423	-0.996983	-1.03746	-0.816514	-0.220944	0.180469	-0.0404752
ENSG00000102893	PHKB	26.4346	30.0349	26.3478	23.1198	0.818581	0.648677	0.807645	0.887152	0.996449	0.865964	0.178823	0.35082	0.174412	0.176408	-0.00441073	0.171997
ENSG00000102897	LYRM1	19.7939	21.8407	19.0657	16.9514	0.94102	0.853858	0.963488	0.967415	0.988034	0.948983	0.20162	0.331122	0.152591	0.178531	-0.0490285	0.129502
ENSG00000102898	NUTF2	143.634	162.945	159.841	147.041	0.976794	0.739517	0.815494	0.633382	0.723263	0.980203	-0.033362	0.146276	0.118868	0.0274079	0.15223	0.179638
ENSG00000102900	NUP93	113.688	97.28	112.35	91.4418	0.606505	0.961961	0.658525	0.775666	0.990414	0.814492	0.308099	0.087435	0.291316	-0.203881	-0.0167829	-0.220664
ENSG00000102901	CENPT	19.0612	19.1475	16.3649	13.5146	0.492727	0.720751	0.795754	0.997168	0.860809	0.913581	0.440961	0.446861	0.243325	0.203536	-0.197637	0.00589948
ENSG00000102908	NFAT5	2.48297	2.60492	2.81513	2.4163	0.983774	0.943351	0.832214	0.970635	0.883614	0.952633	0.0216167	0.0603379	0.124737	-0.0643987	0.10312	0.0387212
ENSG00000102910	LONP2	25.6782	23.9637	28.3504	23.0829	0.743273	0.965048	0.327313	0.89359	0.778746	0.56255	0.142046	0.0497918	0.275011	-0.22522	0.132965	-0.0922541
ENSG00000102921	N4BP1	14.3248	44.7556	14.2054	13.892	0.986677	0.02647	0.990145	0.0353284	0.995506	0.0325417	0.0387646	1.55684	0.0281739	1.52866	-0.0105907	1.51807
ENSG00000102931	ARL2BP	56.9259	57.8083	53.234	57.1029	0.996629	0.990145	0.929593	0.988666	0.935688	0.90592	-0.00432703	0.0171168	-0.0976723	0.114789	-0.0933453	0.0214438
ENSG00000102934	PLLP	16.1548	13.9842	13.6686	14.4718	0.920761	0.98438	0.970145	0.869046	0.787315	0.988034	0.140353	-0.0433517	-0.0721219	0.0287703	-0.212475	-0.183704
ENSG00000102967	DHODH	16.3973	16.5263	13.1757	14.048	0.830014	0.865609	0.96272	0.994184	0.671307	0.738455	0.197101	0.207181	-0.0806304	0.287812	-0.277731	0.0100807
ENSG00000102974	CTCF	30.9268	32.2201	28.568	35.4951	0.432814	0.661422	0.063306	0.923898	0.762162	0.52956	-0.18744	-0.131858	-0.29468	0.162822	-0.10724	0.0555817
ENSG00000102977	ACD	19.7057	19.5938	20.5506	21.0127	0.888649	0.873351	0.978289	0.992831	0.946561	0.935006	-0.0843563	-0.0918131	-0.0292644	-0.0625487	0.0550919	-0.0074568
ENSG00000102978	POLR2C	79.4608	126.056	80.4189	95.8554	0.666029	0.613603	0.682811	0.272115	0.990589	0.28667	-0.264545	0.388051	-0.247676	0.635728	0.0168692	0.652597
ENSG00000102981	PARD6A	2.05629	3.21538	1.87325	4.81749	0.0241497	0.364695	0.0125108	0.413244	0.963859	0.272858	-0.74908	-0.386468	-0.815696	0.429228	-0.0666162	0.362612
ENSG00000102984	ZNF821	1.23377	0.811702	1.26883	1.73842	0.891174	0.505334	0.896358	0.857134	0.993509	0.821909	-0.209212	-0.410985	-0.193654	-0.217331	0.0155573	-0.201773
ENSG00000102996	MMP15	42.122	44.2954	42.5398	43.2608	0.961635	0.966551	0.978474	0.883824	0.986677	0.920696	-0.0367639	0.0326068	-0.023167	0.0557738	0.0135969	0.0693707
ENSG00000103005	USB1	92.7245	78.2687	89.5168	82.3155	0.788975	0.968512	0.880653	0.776298	0.971432	0.838505	0.16794	-0.0709603	0.118239	-0.189199	-0.049701	-0.2389
ENSG00000103018	CYB5B	177.674	147.176	179.84	153.011	0.59977	0.974355	0.539676	0.687424	0.987983	0.654085	0.213011	-0.0553551	0.230299	-0.285654	0.0172879	-0.268366
[truncated: 11,366 more rows]
